# Supplementary material
Source: PubMed Central journal article supplement (PMC5753769)
Supplement: NIHMS929167-supplement-Supp_info.pdf [file NIHMS929167-supplement-Supp_info.pdf]

## **Supporting Information**

1. Supplemental Note S1.
2. Supplemental Note S2. Experimental
3. Supplemental Tables T1-T6.
4. Supplemental Figures S1-S4.

## **Supplemental Note S1**

### **S1.1. Definition of dementia used**

As previously detailed [11], we identified significant cognitive decline/dementia by caregiver and patient report of cognitive impairment in more than one cognitive domain that interfered with function. This was rated using the Clinical Dementia Rating (CDR), which was administered as a semi-structured interview. The investigators also used the MMSE, the Dementia Rating Scale (DRS), the Frontal Assessment Battery and the Short Orientation, Memory Concentration Test, which allowed assessment of a broad range of cognitive function. This classification was highly correlated with cortical atrophy, suggesting validity.[11] We did not use the Movement Disorder Society (MDS)-criteria, which were not available at the time of classification of subjects; however, we recently retrospectively examined all subjects using our CDR-based or DRS based classification and showed considerable overlap (57-78%) with classification using an independent neuropsychological battery (using cutoffs 1.5-2 SD suggested by MDS) (McDermott K, unpublished data, presented at the International Conference on Dementia, Banff, AB, May 2016). Our classification was more comprehensive taking into account all clinically available information.

### **S1.2. More information on participants**

Participants performed three waves of standardized assessments, including assessment for cognitive function and dementia. In brief, we used patient and caregiver reports to determine clinical dementia rating. We used cognitive and functional assessment to determine if significant cognitive decline was present.[13,14] No single test was used. The mental status assessments

included the standardized Mini-Mental Status Examination, the Frontal Assessment Battery and the Clinical Dementia Scale in order to cover a broad range of cognitive function.

### **S1.3. Uni-variate statistical analysis**

In our work, t-test and volcano plot are used for uni-variate statistical analysis.

For the pair-wise comparisons of Control vs. PD and PDND vs. PDID, we conducted “t-tests for two independent samples” for each metabolite in Excel, with the assumption of two-tailed distribution and equal sample variance. The t-test was used to determine if the means of two populations were equal. For example, by analyzing the samples from the control group and the PD group, we were informed whether the mean concentration of a specific metabolite in blood of PD patients is different from that in the blood of the healthy control group. The purpose of doing this is to determine whether a specific metabolite can be used to differentiate the PD patients from healthy controls according to blood concentrations.

Applying multiple tests to a single set of data may result in an increase in false positives. To address this issue, we followed the method described in the work of LeWitt et al.[8]. Briefly, we calculated the q-value, which is the false discovery rate (FDR) analogue of the p-value, for each p-value. The q-values were generated using QVALUE, an R package.[19] Supplemental Table T1 lists the p-values and q-values for Control vs. PD and PDND vs. PDID. A q-value represents the false positive percentile among the metabolites whose q-values are smaller than this value. For the cut-off of FDR, we used a value of 10%. We note that, in our statistical analysis, the t-test was used only as the primary screening of the significant metabolites. The selected significant metabolites were further investigated using fold change, box and whisker diagram, and ROC analysis. Therefore, starting with a relative large FDR would ensure the

inclusion of more potential significant metabolites in the subsequent analyses, thereby decreasing the chance of missing some true biomarkers.

The volcano plot is a set of many uni-variate analyses (fold change and p-value/q-value). For each individual metabolite, the fold change is the ratio of the average concentration in one study group to that in the other study group. The t-tests are also individually performed for each metabolite to report the p-value and the corresponding q-value. On the volcano plot,  $\log_2$  (fold change) is plotted on the x-axis and  $-\log$  (q-value) is plotted on the y-axis to visualize these two parameters for all the variables. The volcano plot itself has no data analysis function. Usually there is a cut-off threshold of the fold change to determine the significantly changed variables. The criterion we used was that the fold change should be larger than 1.2 or smaller than 0.83. The red color means the fold change of this metabolite is larger than 1.2 and the q-value of it is smaller than 0.1. The blue color means the fold change of this metabolite is smaller than 0.83 and the q-value of it is smaller than 0.1.

#### **S1.4. Definition of putative identification**

Putative identification refers to a structure in the HMDB library and EML database with its mass matched to that of a detected peak pair or metabolite in the samples. Listing these putatively identified metabolites is useful not only in the present study but also for future research. For example, future researchers can consult this list of putatively identified metabolites for information about (or validation of) a specific peak pair or metabolite determined to be a biomarker or related to a specific metabolic pathway of interest. These matched structures can be

used as the starting point for future confirmation including the synthesis of standards to positively identify the putative matches.

### **S1.5. PLS-DA regression model**

A total number of 719 metabolites were included in the PLS-DA analysis. It is known that PLS-DA or OPLS-DA models may have over-fitting issues since the number of variables is usually larger than the number of samples. To avoid the case that a model gives a good separation of two groups by random chance, validation methods are needed. We actually used two methods to avoid the over-fitting issue. The first one is cross-validation, which gives the  $R^2$  and the  $Q^2$  values. The second is the permutation test. For the cross-validation approach, the original dataset is separated into two sub-sets. One is the training dataset and the other is the testing dataset. The training dataset is first used to generate the PLS-DA model. Since a few principal components cannot explain the total variance of the whole dataset and there is always a residual, we need a parameter to measure the goodness of the fit. The  $R^2$  value is the ratio of the variance in the training dataset that this model can explain to the total variance in the training dataset. Therefore,  $R^2$  estimates the goodness of fit, and an  $R^2$  closer to 1 is preferred. After that, the testing dataset is substituted into the PLS-DA model and it then predicts the class labels of the samples in the testing dataset. The  $Q^2$  value is the ratio of the variance in the testing dataset that this model can predict to the total variance in the testing dataset. Therefore,  $Q^2$  estimates the goodness of prediction, and a  $Q^2$  closer to 1 is preferred.

Empirically, a very high  $Q^2$  value, which is usually supposed to be higher than 0.9, is believed to represent a good and valid separation. At the same time, other researchers have asserted that the model can be accepted as long as the  $Q^2$  value is larger than 0.5. However, there

is no universally accepted cut-off threshold of  $Q^2$  value to determine whether a model should be accepted. The value of  $Q^2$  has no statistical significance as it has no values with which to be compared. For example, it is not easy to interpret the statistical meaning of a  $Q^2$  value of 0.51. In order to prove a  $Q^2$  value that is not that large is not given by random chance, we need to apply a permutation test, in which the class labels of the two groups are permuted. A correlation coefficient, which is the x-axis of the permutation plot, represents how close the permuted group assignment is to the original group assignment. When the correlation coefficient is 0, the group assignment is totally randomized. For each permuted case, the  $R^2$  and the  $Q^2$  are calculated and plotted onto to permutation plot. The rationale behind the permutation test is that with the wrong class labels, the newly calculated classification model should not be able to predict the classes very well. Then the  $Q^2$  of the original dataset can be compared with the  $Q^2$  values of the randomized data. If we find that the  $Q^2$  values of the permuted models are all much lower than the  $Q^2$  value of the original model, we can tell that the separation of the original model is not generated by chance.

#### **S1.6. Receiver operating characteristic curves (ROC) analysis using random forest method and criteria used for selecting the biomarkers and forming the panels**

Receiver operating characteristic (ROC) curves are graphical plots that illustrate the performance of a binary classifier system as its discrimination threshold is varied. In our work, ROC analysis was used to show to diagnosis power of one or a group of metabolite candidates. There are several classification models available for building an ROC curve, such as the PLS,

random forest, support vector machines, etc. Among them, we have chosen the random forest method for our analysis.

Random forest analysis (from R) was used in this report as the classifier of the ROC analysis. In general, the random forest method begins with splitting the original data set using bootstrapping into many small sub data sets. Some of these small data sets work as training sets and others work as testing sets. For each training set, a decision tree is generated. A random number out of the five biomarker candidates might be involved in one specific decision tree. An example of a decision tree can be: if No. 429 < 0.5, the result is PD; if not, it then examines No. 197; if No. 197 > 1.5, the result is PD, and if not, the result is Control. For each new testing data set input into the random forest model, each decision tree will produce a specific result. After the testing data works through many decision trees, the result with most hits (or votes) is the final output. For the testing sets, the true grouping information is known, so we can calculate the sensitivity (true positive rate) and specificity (1-false positive rate). As the software changes the cut-off thresholds in the decision trees, more pairs of sensitivity and specificity are generated. These are then used to plot the ROC curve. Random forest analysis is a powerful machine-learning-based procedure for predictive biomarker discovery analyses. The advantage of this method is that it can easily cope with missing values, outliers, and relatively small sample sizes.

For building the ROC curves, we did not simply input all 709 variables into the model and then let it find the best five biomarker candidates to use in building the ROC curve. Instead, we manually selected the candidates based on standard procedures. To select the potential biomarkers for differentiating PD vs. control, 5 metabolites were selected according to the following criteria: (1) a large fold change, (2) a q-value of smaller than 0.1 and (3) metabolite identification with high confidence (positive IDs were preferred as they could be immediately

used as biomarkers if they could be validated in future studies using large cohorts of samples). The metabolites were first ranked according to their fold change. There were seven putatively identified significant metabolites with fold changes of larger than 10, and each of these generated an ROC curve with very high AUC (the lowest one was 0.914). If these metabolites could be positively identified, they would work as very strong biomarkers for the diagnosis of PD. In order to use more positively identified metabolites to build the classification model, the positively identified metabolites were selected from the top 20 ranked metabolites (according to fold change). We excluded vanillylmandelic acid as it is potentially related to catecholamine metabolism, which can be affected by the dopa medication. The three selected metabolites were vanillic acid, hydroxykynurenine and theophylline. Since the discrimination power of these three positively identified metabolites were not strong (AUC=0.698), two putatively identified metabolites with large fold changes and high-confidence putative identifications, isoleucyl-alanine and 5-acetylamino-6-amino-3-methyluraci, were added to make a 5-metabolites biomarker panel. The ROC curve of this panel of 5 metabolites produced an AUC value of 0.955 with sensitivity of 87.5% and specificity of 93.0%. Adding more metabolites to this panel resulted in only minor increase in sensitivity and specificity. Considering that in real world clinical applications a panel of a few metabolites is preferred over a panel of many metabolites, we concluded that this panel of 5 metabolites was sufficient to illustrate the overall performance of the metabolic profiles for differentiating PD vs. Control. We note that using CIL LC-MS there is no need to select the panel for targeted analysis in a validation study. CIL LC-MS is a quantitative method where thousands of metabolites can be analyzed in one LC-MS run. Thus, the selected biomarkers discussed in this work are only used to illustrate the separation performance. These biomarkers, along with all other labeled metabolites, will be monitored in



our future validation studies. This approach will increase the likelihood of finding the high performance biomarkers which may be different from the initial biomarkers determined using a small cohort of discovery samples.

We followed a similar procedure for PDND vs. PDID discrimination. The minor variations were that, although we began with the top 20 metabolites according to the fold change and q-value, the positively identified metabolites did not produce a good classification model. Therefore, we selected a combination of eight positively and putatively identified metabolites with the highest fold changes. This panel gave a very good performance as discussed in the text.

We are aware—and it is generally known—that different selection criteria can result in the inclusion of different biomarker candidates. This, in turn, could lead to small changes in the observed ROC curves. One efficient way for selecting the biomarker candidates is to sort the univariate AUCs from high to low and pick the highest-ranked metabolites. Since a large fold change does not necessarily mean a large AUC, the selected biomarker candidates might be slightly different from the list of biomarkers that we are using. However, we followed a standard, efficient and productive procedure. As an illustration, we built another ROC curve with five metabolites (Numbers 429, 562, 563, 135 and 197) according to uni-variate AUC. Among these five, No. 429 and No. 135 are being used in the current panel (of the present report) and No. 562, No. 563 and No. 197 are new. The AUC of the new ROC curve is 0.973 (95% confidence interval: 0.930-0.998). Comparing to the current panel (AUC=0.955), the diagnosis power (AUC) is not greatly improved, but the confidence of metabolite identification is lower (No. 562 and No. 563 can only be matched to the EML library). Therefore, we chose to use more comprehensive criteria for selecting the biomarker candidates in the present study.

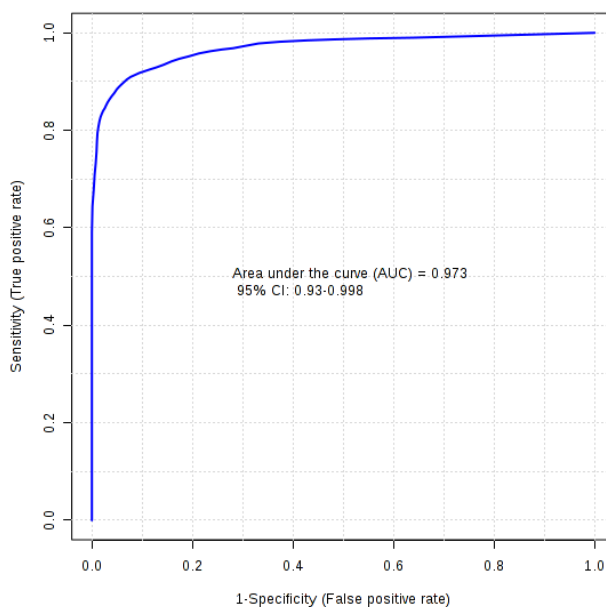

Figure 1. ROC curve generated by random forest model using No. 429, No. 562, No. 563, No. 135 and No. 197.

We also note that random forest models can handle more biomarker candidates and that an optimized number of metabolites can be found by comparing the AUC values of multiple models. For the PDND vs. PDID study, we input all the 36 significantly changed metabolites into Metaboanalyst, and these metabolites were ranked by application of a random forest analysis. Subsequently, different numbers of the top-ranked metabolites were used to generate the ROC curves. Figure 2 (see below) shows a series of ROC curves generated from different numbers of variables. For example, the red ROC curve (AUC = 0.729) is produced by the top two metabolites. Clearly, the remaining curves, each of which reflects the results after including more variables in the system, are associated with increasing discrimination power. The highest discrimination (AUC = 0.904) is produced by the analysis that includes all 36 metabolites. However, for clinical diagnostic purposes, we were trying to balance (1) achieving high

sensitivity and specificity with (2) minimizing the required number of metabolites in the diagnosis panel. For real-world applications, a smaller set of biomarkers will be easier to quantify. Moreover, half of the present 36 significant metabolites have not yet been identified. As we noted earlier, we determined a priori that we wanted to include only the identified metabolites in the discrimination panel. For this reason, we did not input all the significant metabolites into the system. For the PDND vs. PDID, we selected 8 metabolites according to our criteria, and the resulting AUC is close to that produced by the 20-metabolite panel.

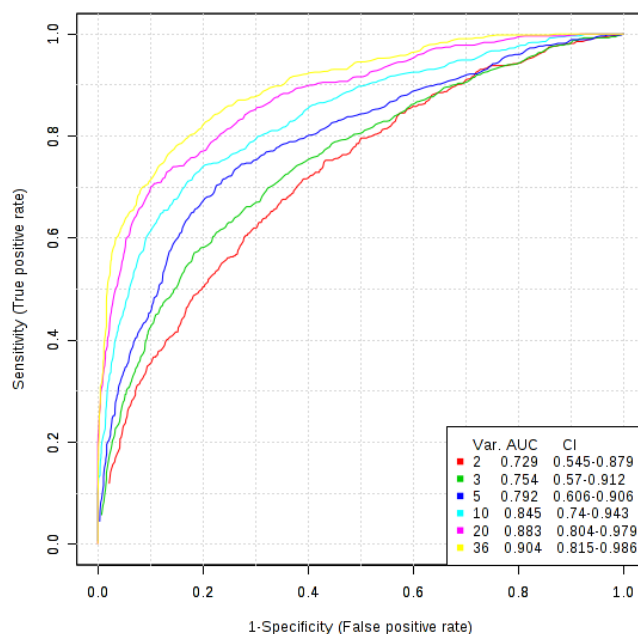

Figure 2. Comparison of ROC curves generated from different numbers of variables (2 variables in red, 3 variables in green, 5 variables in dark blue, 10 variables in sky blue, 20 variables in purple and 36 variables in yellow).

For Control vs. PD, as we mentioned before, seven putatively identified significant metabolites with fold changes of larger than 10, and each of these generated an ROC curve with very high AUC (the lowest one was 0.914). So inputting more metabolites into the system will

further increase the discrimination power. However, as more significant metabolites are positively identified, we prioritized the positively identified metabolites when selecting the biomarker candidates. We also generated an ROC curve with all the 11 positively identified metabolites among the 76, including citrulline, methionine sulfoxide, isomer of methionine sulfoxide, pantothenic acid, glycyl-valine, vanillylmandelic acid, pipecolic acid, theophylline, Vanillic acid, hydroxykynurenine and serotonin. The resulting ROC curve is shown in Figure 3. The AUC value is 0.979, and the sensitivity and specificity at the optimal point are 90.0% and 96.0%, respectively. Compared to the current 5-metabolites panel, the performance improvement is not very significant, so we retain the current panel as a smaller panel size is preferred.

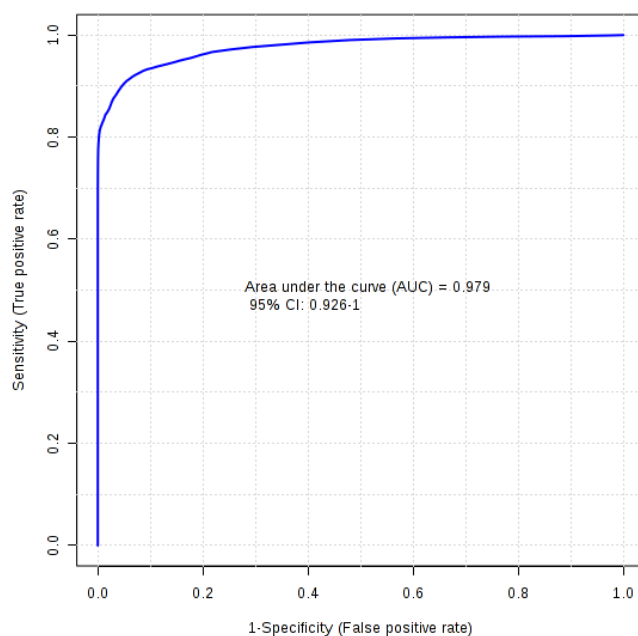

Figure 3. ROC curve generated by the random forest model using 11 positively identified significant metabolites for the Control group and PD group.

### S1.7. Permutation tests for ROC curves

To address the issue of potential over-fitting in generating ROC curves from the biomarker panels, we did a permutation test, which can help detect potential over-fitting. The group assignment of the original data set was permuted to generate many other ROC curves, as shown in the graph (see Figure 4 below). In this permutation graph for the ROC curve of Control vs. PD, we can clearly see that the ROC curves generated with the 5-metabolites panel and randomized group assignments are all around the diagonal, representing the random conditions. As the AUC of our curve is much better than those of the permuted curves, we can conclude that there is no significant over-fitting issue. We also show the permutation test result of the biomarker panel for PDND vs. PDID (see Figure 5 below). Although the distance between the original data and the permuted data is not as large as in the first graph (Figure 4), it still shows a clear separation and thus over-fitting is not an issue in this case either.

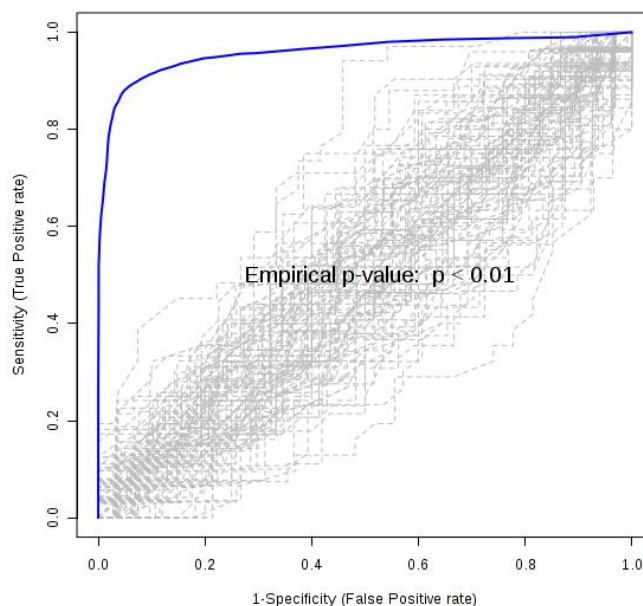

Figure 4. Permutation test result for the ROC curve of Control vs. PD.

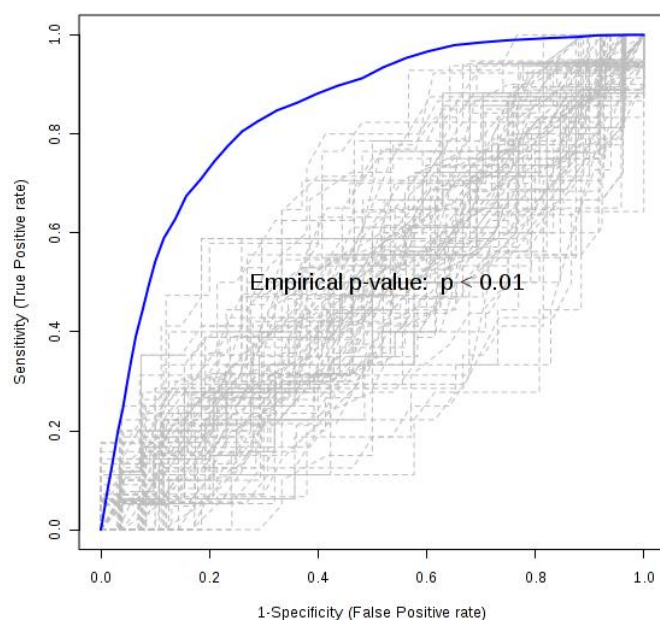

Figure 5. Permutation test result for the ROC curve of PDND vs. PDID.

### S1.8. Effect of unidentified metabolites used in the panels on differentiation performance

In the list of significant metabolites, there were 38 detected metabolites that could not be matched to the dansyl standard library or the human metabolome databases. Supplemental Table S6 lists the fold changes and p-values of these unidentified metabolites along with those of the identified (positively or putatively) metabolites used as the current biomarker panels. We list p-values in this table as the p-value is more straight forward when we are comparing uni-variate analysis results, and the variable with smaller p-value always has a smaller q-value.

For Control vs. PD, the five identified metabolites currently used and their fold changes are: vanillic acid (3.48), hydroxykynurenine (2.73), theophylline (0.48), isoleucyl-alanine (0.66) and 5-acetylamino-6-amino-3-methyluracil (0.61). Among the 38 unidentified metabolites, only the fold change of ID506, 1.65, is larger than the worst one in the current panel, which is 5-acetylamino-6-amino-3-methyluracil (0.61). Therefore, we used ID506 to replace 5-acetylamino-

6-amino-3-methyluracil to build a new 5-metabolites panel, and the resulting ROC curve is shown in Figure 6 (see below). The AUC of the new ROC curve is 0.956, which is very close to that of the current 5-metabolites panel (0.955). Based on this analysis, we determined that it was not necessary to use the unidentified metabolites in the current diagnosis panel.

For PDND vs. PDID, none of the 38 unidentified metabolites surpassed the eight metabolites currently being used according to the fold change and p-value. Therefore, there was no need to use the unidentified metabolites to build a new panel.

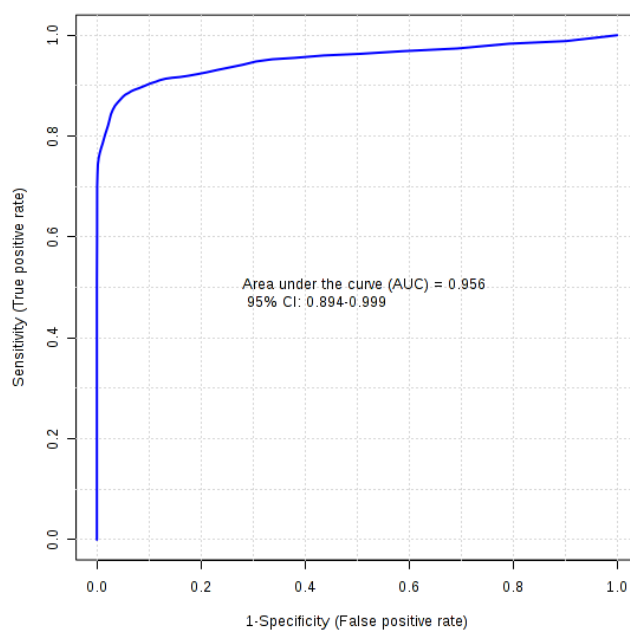

Figure 6. ROC curve generated by the random forest model using 5 metabolite biomarker candidates: vanillic acid, hydroxykynurenine, theophylline, isoleucyl-alanine and unknown ID506.

### **S1.9. Comparison of biomarkers found using PLS-DA analysis and those by the random forest method.**

The PLS method can be used to predict grouping information and to perform ROC analyses. With the PLS-DA model for differentiating between Control and PD groups, we generated a ROC curve with an AUC of 0.936 (see Figure 7 below). However, compared to the random forest method, the PLS-DA approach has some disadvantages. Specifically, it can be more significantly affected by the presence of missing values in the metabolite-intensity data matrix, which may explain the observation of a more “lumpy” curve. In addition, the PLS-DA model is susceptible to the over-fitting problem if validations are not properly performed. Therefore, we chose to use the random forest method to conduct the ROC analyses in this research project.

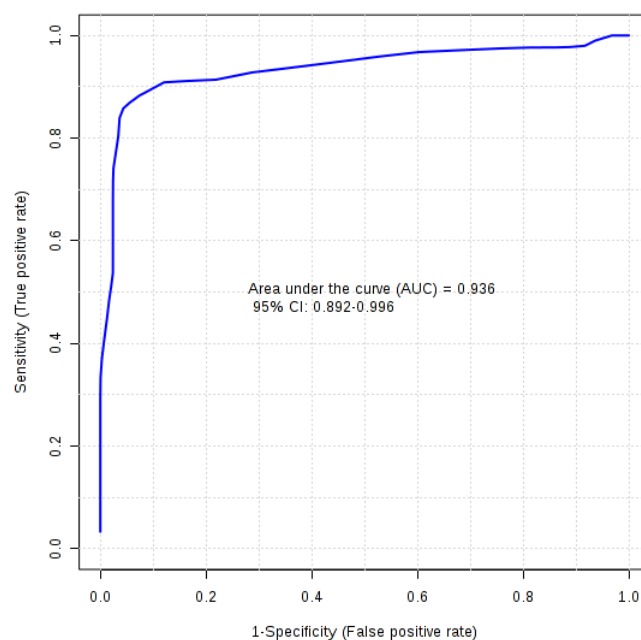

Figure 7. ROC curve generated by the PLS-DA model for Control vs. PD.

Nevertheless, we have investigated the differences in the results generated by the two statistical models: PLS-DA and random forest method. The MetaboAnalyst program assesses the variable importance in terms of a VIP score for the PLS-DA method, or in terms of a Mean



Decrease Accuracy (variables ranked by their contributions to classification accuracy) for the random forest method. In Table 1 (see below), we have listed the top 15 significant metabolites (for Control vs. PD) from both methods, with their VIP scores and Mean Decrease Accuracies, respectively. The metabolites commonly existing in the two lists are labeled in red.

Table 1. List of top 15 significant metabolites (for Control vs. PD) according to the VIP score (from the PLS-DA model) or the Mean Decrease Accuracy (from the random forest model). The common metabolites are shown in red.

| PLS-DA       |           | Random Forest |                        |
|--------------|-----------|---------------|------------------------|
| Variable No. | VIP score | Variable No.  | Mean Decrease Accuracy |
| 502          | 4.2071    | 502           | 0.020725               |
| 714          | 3.9855    | 714           | 0.017421               |
| 429          | 3.9477    | 429           | 0.015893               |
| 306          | 3.8046    | 306           | 0.015729               |
| 563          | 3.6543    | 562           | 0.010278               |
| 562          | 3.5936    | 249           | 0.0091136              |
| 712          | 3.4930    | 563           | 0.0084603              |
| 249          | 3.4643    | 570           | 0.0077845              |
| 570          | 3.2113    | 355           | 0.0060562              |
| 355          | 2.9694    | 712           | 0.0050555              |
| 612          | 2.6587    | 710           | 0.0043272              |
| 135          | 2.6199    | 135           | 0.0031059              |

|     |        |     |           |
|-----|--------|-----|-----------|
| 292 | 2.5076 | 612 | 0.0030599 |
| 295 | 2.4832 | 541 | 0.0028203 |
| 294 | 2.4743 | 707 | 0.0027604 |

As can be seen in the table, 13 metabolites have high rankings in both methods, and the orders of the top 5 metabolites are exactly the same. Based on these results, we conclude that the two statistical models (PLS-DA and random forest analyses) provide equivalent biomarker candidates.

#### **S1.10. Differentiation of the more demented versus less demented subjects**

There were relatively few patients within each dementia severity range as this was an incident cohort (subjects were initially non-demented) with relatively short follow up (36 months). When we divided groups according to clinical severity there were 6 with mild dementia and 10 with more moderate to severe dementia at the final time point. While recognizing the sample size was small, we performed the PLS-DA analysis to see if we could differentiate these two groups. The PLS-DA score plot and the permutation test result are shown in Figures 8 and 9 (see below). Although the two group sizes were small, a good separation model with  $R^2=0.987$  and  $Q^2=0.766$  was generated and this model passed the permutation test.

In addition, we did the uni-variate ROC analyses of the metabolome data set for differentiating the two groups. The top five metabolites with the highest AUC values were found to be: ID329 (m/z 163.1034, putatively identified by the EML library with structure matches shown in Supplemental Table T3) (AUC=0.938), 5-acetylamino-6-amino-3-methyluracil (putatively identified by the HMDB library with structure matches shown in Supplemental Table

T3 and used in the panel for differentiating Control vs. PD) (AUC=0.875), theophylline (definitively identified by Dns-library and used in the panel for differentiating Control vs. PD) (AUC=0.867), ID496 (m/z 126.0316, putatively identified by the EML library) (AUC=0.858) and ID478 (m/z 245.0697, putatively identified by the EML library) (AUC=0.825). It is interesting to note that, among the top five metabolites, two of them are related to both the onset of PD and the progression of dementia.

We also examined the AUCs of the eight metabolites used in the diagnosis panel for differentiating PDID from PDND for differentiating the more demented vs. less demented subjects. They are: His-Asn-Asp-Ser (AUC=0.742), 3, 4-dihydroxyphenylacetone (0.625), desaminotyrosine (0.604), hydroxy-isoleucine (0.604), alanyl-alanine (0.571), putrescine [-2H] (0.654), purine [+O] (0.775) and its riboside (0.783). Among these eight metabolites, three metabolites have relatively high discrimination power (AUC > 0.7) for determining dementia severity.

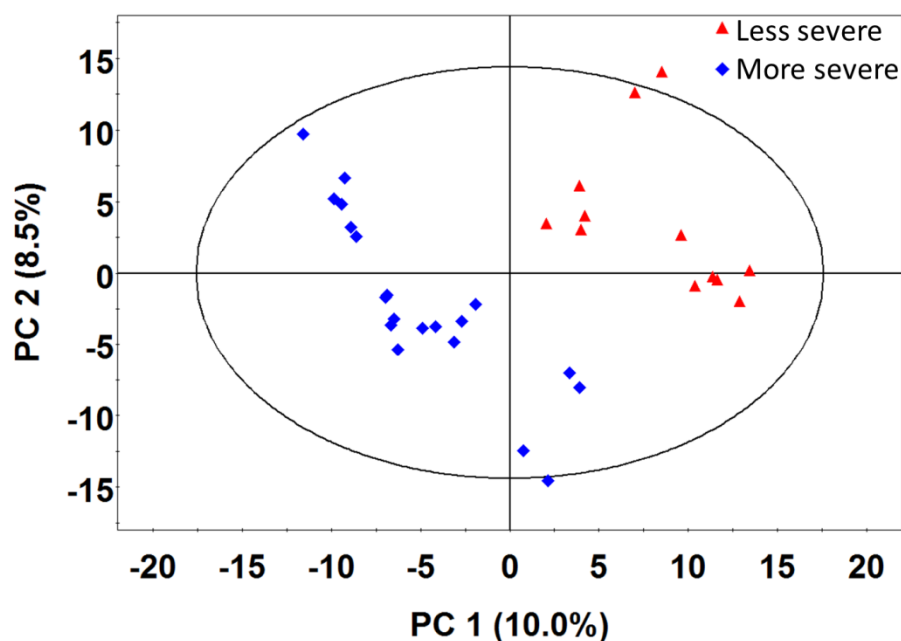

Figure 8. PLS-DA score plot for differentiating PD patients with less severe dementia vs. more severe dementia.

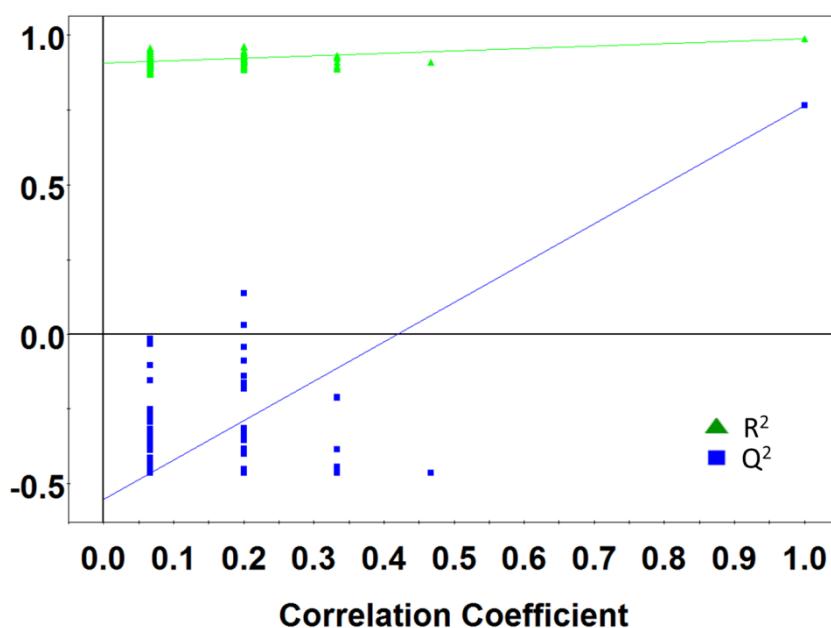

Figure 9. Permutation test result of the PLS-DA model shown in Figure 6.

### S1.11. Age effect on group separation

We have examined the effect of age within the healthy control group. The 42 participants at baseline ranged from 65 to 84 years old, with an average of 71. We split the healthy group into two age groups: 22 individuals under 71 and 20 individuals of 71 or older. We used the PLS-DA analysis to investigate the difference between these two groups. The resulting score plot is shown in Figure 10 (see below). Although there is a separation of the two groups in the plot, the  $Q^2$  value of the model is only 0.477, indicating that the separation is not valid.

We also performed the uni-variate ROC analyses of the metabolites used in the two diagnosis panels. The metabolites and their corresponding AUCs are: vanillic acid (0.586), 3-

hydroxykynurenine (0.540), theophylline (0.664), isoleucyl-alanine (0.584), 5-acetylamino-6-amino-3-methyluraci (0.651), His-Asn-Asp-Ser (0.610), 3, 4-dihydroxyphenylacetone (0.584), desaminotyrosine (0.682), hydroxy-isoleucine (0.535), alanyl-alanine (0.510), putrescine [-2H] (0.563), purine [+O] (0.503) and its riboside (0.520). These AUC values are low, indicating that these metabolites do not differ significantly between the two age groups.

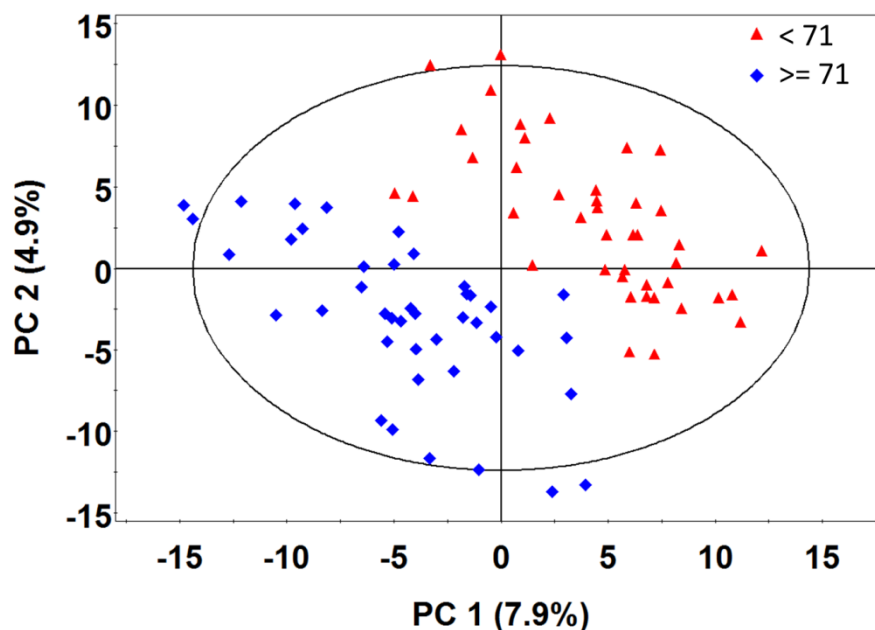

Figure 10. PLS-DA score plot for differentiating healthy people below and above 71 years old.

### S1.12. Limitations due to medication, diet and single-time sample collection

In this study, the majority (all but 2) of the patients were on levodopa with few on additional medications. When we compared total levodopa (not equivalents) between those with and without future cognitive impairment there was a difference between groups [cognitively intact mean (SD): 452 (278); dementia mean (SD) 641 (286);  $p = 0.049$ ]. To minimize the influence of medication on group differentiation, we excluded the detected metabolites which are involved in the dopa metabolism pathway. These include dopa-sulfate, dopamine-3-O-sulfate,

dopamine-4-O-sulfate, 3-methoxytyrosine, 3, 4-dihydroxyphenylethanol, 3, 4-dihydroxyphenylacetic acid, 3-methoxy-4-hydroxyphenylethyleneglycol and homovanillic acid. The pre-analysis exclusion approach has been used in many other studies, such as the work of LeWitt et al.[8] However, it remains possible that levodopa itself may have influenced the results.

On diet effect, in this work, subjects came to the study in the morning after taking morning medication but no food or caffeine. They were given a breakfast after the samples were obtained. While it would have been ideal to take samples before medication this was a symptomatic group of patients and we felt it would be challenging (logistically and ethically) to withdraw patients from medication. Clearly this is something to consider in follow up validation studies.

On sample collection, we collected blood only at baseline, not at multiple time points, and thus intra-patient comparisons of changes in metabolome profiles are not possible. A predictive analysis to check if PD patients without dementia at baseline have specific profiles with respect to the evolution to dementia is not possible either. We would recommend this follow-up blood collection for future research. We note that, in this work, our research goal was to compare PD with PDID, where the PD group was stable for the full period (and thus PDND) and the PDID is PDND at baseline but PDID 3 years later. This is a very interesting challenge, comparing two groups who, for all clinical purposes, were members of the same phenotype at baseline, with one developing dementia during the ensuing three years. We asked whether there would be detectable biomarker differences between these groups prior to their bifurcation into two subgroups. This attempt to discover early biomarkers of incipient dementia in PD patients was successful. Our design did not permit analyses of stable PDND and PDID, as we did not

collect blood at the third wave. The patients diagnosed at the onset of cognitive decline; therefore, they were very early in the course of cognitive decline.

### **S1.12. Correlations of other measures of PD progression with metabolomic changes.**

We have not examined correlations of other measures of PD progression with metabolomic changes. Future work using a larger number of subjects might enable us to examine selected correlations. In this work, we avoided examining motor assessments as they may be more directly related to treatment. PD medications can improve motor status, but not cognitive function. No patients were on medications for cognition. We showed in our previous longitudinal study that motor and cognitive decline were correlated (MMSE/UPDRS linear correlation  $r=0.244$ ,  $p=0.029$ ).[13,14] Moreover, the motor measures are not readily dichotomized as present/absent. Of course all patients by definition had motor impairment at baseline (not significant cognitive impairment) and our goal of this work was to examine the incidence of cognitive decline.

### **S1.13 Internal validations for the statistical studies.**

An external validation with new samples is essential to this work, and this will be done in the future. With the current data, we took several steps to establish internal validation. We used cross-validation and permutation procedures together with statistical methods. Specifically, for the PLS-DA analysis, the  $R^2$  and  $Q^2$  values are actually generated by cross-validation. A part of the data was used as the training set and the remaining data were used as the testing set. The good  $R^2$  and  $Q^2$  values showed that the PLS-DA separation between the two groups was valid. Subsequently, this result was further validated by a permutation test, which rearranged the

grouping information. In addition, the ROC curve was validated by a permutation test to avoid over-fitting. Finally, to manually perform a cross-validation for the diagnosis panels, we randomly picked some samples from each study group and label them as “new data” before re-inputting them into the diagnosis model provided by Metaboanalyst. If the output group information of these samples from the diagnosis model can match to their true group information, our diagnosis model can be validated by this small internal set of samples.

For Control vs. PD, we randomly picked 10 control and 10 PD samples and labeled them as “new data” to be the testing set. The current 5-biomarker panel correctly grouped all of them. For the PDND vs. PDID panel, we randomly chose 5 PDND samples and 5 PDID samples to serve as the testing set, and the result also showed very good prediction power. The results are shown in the following tables (Table 2 and Table 3).

Table 2. Prediction results of 10 control samples and 10 PD samples given by the 5-biomarker panel.

| Name    | Probability | True Class | Output Class |
|---------|-------------|------------|--------------|
| 010-New | 0.95734     | Control    | Control      |
| 014-New | 0.95294     | Control    | Control      |
| 033-New | 0.95021     | Control    | Control      |
| 035-New | 0.83045     | Control    | Control      |
| 037-New | 0.75114     | Control    | Control      |
| 040-New | 0.79774     | Control    | Control      |
| 046-New | 0.86796     | Control    | Control      |
| 050-New | 0.80981     | Control    | Control      |



|         |         |         |         |
|---------|---------|---------|---------|
| 067-New | 0.98047 | Control | Control |
| 074-New | 0.88057 | Control | Control |
| 002-New | 0.98836 | PD      | PD      |
| 004-New | 0.85274 | PD      | PD      |
| 013-New | 0.73185 | PD      | PD      |
| 020-New | 0.84236 | PD      | PD      |
| 021-New | 0.92356 | PD      | PD      |
| 026-New | 0.99681 | PD      | PD      |
| 032-New | 1       | PD      | PD      |
| 047-New | 1       | PD      | PD      |
| 081-New | 0.64957 | PD      | PD      |
| 096-New | 0.99998 | PD      | PD      |
|         |         |         |         |

Table 3. Prediction results of 5 control samples and 5 PD samples given by the 8-biomarker panel.

| Name    | Probability | True Class | Output Class |
|---------|-------------|------------|--------------|
| 003-New | 0.91        | PDND       | PDND         |
| 017-New | 0.94        | PDND       | PDND         |
| 022-New | 0.97333     | PDND       | PDND         |
| 029-New | 0.99        | PDND       | PDND         |
| 081-New | 0.99        | PDND       | PDND         |

|         |         |      |      |
|---------|---------|------|------|
| 008-New | 0.93667 | PDID | PDID |
| 019-New | 0.77667 | PDID | PDID |
| 028-New | 0.77333 | PDID | PDID |
| 043-New | 0.88333 | PDID | PDID |
| 072-New | 0.79667 | PDID | PDID |

## Supplemental Note S2. Experimental details.

### Dansylation Labeling

Briefly, the frozen serum samples were thawed in an ice-bath and then centrifuged at 14000 rpm for 15 min. 30  $\mu$ L supernatant was taken into an Eppendorf tube and was mixed with 90  $\mu$ L methanol. The mixture was then incubated at  $-20^{\circ}\text{C}$  for 2 hours to precipitate the proteins. After this, the mixture was centrifuged at 14000 rpm for 15 min. 90  $\mu$ L supernatant was taken and dried using a Speed Vac. The sample was re-dissolved to 75  $\mu$ L with 2:1 Water/ACN. Then 25  $\mu$ L of 250 mM sodium carbonate/sodium bicarbonate buffer were added into the sample to make a basic environment for the dansylation reaction. The solution was vortexed, spun down, and mixed with 50  $\mu$ L of freshly prepared  $^{12}\text{C}$ -dansyl chloride solution (18 mg/mL) (for light labeling) or  $^{13}\text{C}$ -dansyl chloride solution (18 mg/mL) (for heavy labeling). After 45 min incubation at  $40^{\circ}\text{C}$ , 10  $\mu$ L of 250 mM NaOH was added to the reaction mixture to quench the excess dansyl chloride. The solution was then incubated at  $40^{\circ}\text{C}$  for another 10 min. Finally, formic acid (425 mM) in 1:1 ACN/ $\text{H}_2\text{O}$  was added to consume excess NaOH and to make the solution acidic.

### LC-UV quantification

To perform the LC-UV quantification, a Waters ACQUITY UPLC system with a photodiode array (PDA) detector was used. Briefly, 4  $\mu$ L of the labeled serum was injected onto a Phenomenex Kinetex C18 column (2.1 mm  $\times$  5 cm, 1.7  $\mu$ m particle size) for a fast step-gradient run. Solvent A was 0.1% (v/v) formic acid in 5% (v/v) ACN, and solvent B was 0.1% (v/v) formic acid in ACN. The gradient started with 0% B for 1 min and was increased to 95%

within 0.01 min and held at 95% B for 1 min to ensure complete elution of all labeled metabolites. The flow rate used was 0.45 mL/min. The peak area, which can represent the total metabolite concentration in the sample, was integrated using the Empower software (6.00.2154.003). Based on the quantification results, the  $^{12}\text{C}$ - and  $^{13}\text{C}$ -labeled samples were mixed in equal amounts.

## LC-MS

For LC-MS, an Agilent 1100 series binary system (Agilent, Palo Alto, CA) and an Agilent reversed-phase Eclipse plus C18 column (2.1 mm×100 mm, 1.8  $\mu\text{m}$  particle size, 95 Å pore size) were used. LC solvent A was 0.1% (v/v) formic acid in 5% (v/v) ACN, and solvent B was 0.1% (v/v) formic acid in ACN. The gradient elution profile was as follows:  $t = 0$  min, 20% B;  $t = 3.5$  min, 35% B;  $t = 18.0$  min, 65% B;  $t = 24.0$  min, 99% B;  $t = 28.0$  min, 99% B. The flow rate was 180  $\mu\text{L}/\text{min}$ . After one injection, the column was re-equilibrated with the initial mobile phase conditions for 15 min before injecting the next sample. The flow was loaded to the electrospray ionization (ESI) source of a Bruker maXis impact high-resolution quadrupole time-of-flight (Q-TOF) mass spectrometer (Bruker, Billerica, MA). All MS spectra were obtained in the positive ion mode. According to the UV-quantification result, 1.5 nmol of each labeled and mixed samples were injected into the LC-MS system.

Supplemental Table T1A. List of p-values for Control vs. PD and their corresponding q-values.

| Metabolite No. | p-value (Control vs. PD) | q-value     |
|----------------|--------------------------|-------------|
| 714            | 4.36723E-25              | 1.37965E-22 |
| 429            | 2.51001E-22              | 3.96468E-20 |
| 306            | 1.96549E-21              | 2.06972E-19 |
| 563            | 3.2338E-21               | 2.55397E-19 |
| 562            | 2.48068E-18              | 1.56734E-16 |
| 612            | 2.47553E-10              | 1.30341E-08 |
| 135            | 4.25845E-10              | 1.92184E-08 |
| 294            | 6.72466E-10              | 2.65548E-08 |
| 295            | 8.17867E-10              | 2.8708E-08  |
| 292            | 9.36915E-10              | 2.95981E-08 |
| 712            | 2.26622E-09              | 6.27936E-08 |
| 249            | 2.38525E-09              | 6.27936E-08 |
| 261            | 3.95641E-09              | 9.61437E-08 |
| 293            | 4.37211E-09              | 9.86566E-08 |
| 197            | 4.82678E-09              | 1.01655E-07 |
| 355            | 1.64753E-08              | 3.25294E-07 |
| 370            | 2.37768E-08              | 4.41842E-07 |
| 570            | 2.65643E-07              | 4.66218E-06 |
| 145            | 3.20163E-07              | 5.32329E-06 |
| 258            | 3.98612E-07              | 6.29627E-06 |
| 364            | 4.75583E-07              | 7.15435E-06 |
| 67             | 5.37216E-07              | 7.71417E-06 |
| 506            | 5.74752E-07              | 7.89434E-06 |
| 50             | 1.73198E-06              | 2.23002E-05 |
| 259            | 1.76476E-06              | 2.23002E-05 |
| 248            | 2.21932E-06              | 2.69656E-05 |
| 436            | 2.9605E-06               | 3.46389E-05 |
| 569            | 4.59489E-06              | 5.18418E-05 |
| 244            | 5.0635E-06               | 5.51589E-05 |
| 245            | 5.9434E-06               | 6.25859E-05 |
| 363            | 7.40308E-06              | 7.54421E-05 |
| 350            | 9.26915E-06              | 9.14614E-05 |
| 117            | 9.55408E-06              | 9.14614E-05 |
| 129            | 1.44768E-05              | 0.000134511 |
| 41             | 1.99879E-05              | 0.000173992 |
| 95             | 2.02249E-05              | 0.000173992 |
| 148            | 2.03783E-05              | 0.000173992 |
| 416            | 2.4916E-05               | 0.000207137 |
| 127            | 2.73085E-05              | 0.000221206 |
| 489            | 3.55633E-05              | 0.00028087  |
| 260            | 3.842E-05                | 0.000296031 |
| 243            | 5.03161E-05              | 0.000378461 |
| 26             | 5.26619E-05              | 0.000386893 |

|     |             |             |
|-----|-------------|-------------|
| 564 | 5.9969E-05  | 0.000430563 |
| 390 | 6.6412E-05  | 0.000457221 |
| 568 | 6.74904E-05 | 0.000457221 |
| 130 | 6.80239E-05 | 0.000457221 |
| 692 | 7.27492E-05 | 0.000478795 |
| 468 | 7.63775E-05 | 0.000492416 |
| 490 | 8.58988E-05 | 0.000542725 |
| 105 | 0.000102095 | 0.000632408 |
| 25  | 0.000120241 | 0.000730486 |
| 459 | 0.000134715 | 0.000802977 |
| 19  | 0.000176188 | 0.001030731 |
| 289 | 0.000217362 | 0.001248486 |
| 42  | 0.000240283 | 0.001327066 |
| 128 | 0.000242861 | 0.001327066 |
| 193 | 0.000243645 | 0.001327066 |
| 299 | 0.000267846 | 0.001411479 |
| 561 | 0.000268079 | 0.001411479 |
| 492 | 0.000294751 | 0.00152647  |
| 467 | 0.00031634  | 0.001611853 |
| 352 | 0.000331053 | 0.001660045 |
| 637 | 0.00035722  | 0.001763269 |
| 222 | 0.000374031 | 0.001817846 |
| 186 | 0.000406398 | 0.001945228 |
| 300 | 0.000458023 | 0.00215961  |
| 525 | 0.000465929 | 0.00216458  |
| 584 | 0.000482089 | 0.002207197 |
| 546 | 0.000494707 | 0.00223261  |
| 100 | 0.000544488 | 0.002422662 |
| 544 | 0.000572622 | 0.002460633 |
| 256 | 0.000577747 | 0.002460633 |
| 171 | 0.000580274 | 0.002460633 |
| 139 | 0.000584178 | 0.002460633 |
| 16  | 0.000594638 | 0.002465572 |
| 567 | 0.00060096  | 0.002465572 |
| 231 | 0.000613394 | 0.002484322 |
| 24  | 0.000636676 | 0.002545976 |
| 485 | 0.000652464 | 0.002576496 |
| 134 | 0.000731135 | 0.002851514 |
| 515 | 0.000762955 | 0.002914499 |
| 237 | 0.000765736 | 0.002914499 |
| 706 | 0.000837369 | 0.003149202 |
| 483 | 0.000955485 | 0.00355114  |
| 635 | 0.000967734 | 0.003554843 |
| 476 | 0.001007795 | 0.00365945  |
| 461 | 0.001037269 | 0.003723674 |
| 710 | 0.001081556 | 0.003805328 |
| 361 | 0.001084106 | 0.003805328 |

|     |             |             |
|-----|-------------|-------------|
| 664 | 0.001193308 | 0.004104391 |
| 538 | 0.001195291 | 0.004104391 |
| 420 | 0.001232596 | 0.004186978 |
| 268 | 0.00132032  | 0.004437253 |
| 668 | 0.001524925 | 0.005070932 |
| 247 | 0.001773423 | 0.005835848 |
| 516 | 0.001857864 | 0.006050692 |
| 165 | 0.001911013 | 0.00616028  |
| 164 | 0.001955518 | 0.006240071 |
| 266 | 0.002050792 | 0.006456061 |
| 402 | 0.002064078 | 0.006456061 |
| 373 | 0.002146816 | 0.006649019 |
| 458 | 0.002266461 | 0.006951426 |
| 376 | 0.002339369 | 0.007044226 |
| 588 | 0.002341314 | 0.007044226 |
| 422 | 0.002398475 | 0.007148126 |
| 423 | 0.00260853  | 0.007701493 |
| 6   | 0.002934427 | 0.008583461 |
| 576 | 0.003021261 | 0.008680801 |
| 693 | 0.003022662 | 0.008680801 |
| 320 | 0.003052833 | 0.008688463 |
| 362 | 0.003393073 | 0.009570576 |
| 585 | 0.003443416 | 0.009626622 |
| 273 | 0.003516768 | 0.009745447 |
| 187 | 0.003649836 | 0.01002625  |
| 541 | 0.003720251 | 0.01013158  |
| 330 | 0.003753259 | 0.01013411  |
| 460 | 0.003951835 | 0.01057985  |
| 340 | 0.004063158 | 0.01072691  |
| 650 | 0.004074675 | 0.01072691  |
| 421 | 0.004253865 | 0.01109391  |
| 369 | 0.004284315 | 0.01109391  |
| 358 | 0.004361326 | 0.01114664  |
| 667 | 0.004431528 | 0.01114664  |
| 374 | 0.004434946 | 0.01114664  |
| 326 | 0.004445817 | 0.01114664  |
| 359 | 0.004527393 | 0.01126179  |
| 478 | 0.004566157 | 0.01126948  |
| 595 | 0.004629839 | 0.01133807  |
| 419 | 0.004861893 | 0.01181476  |
| 346 | 0.00491172  | 0.01184473  |
| 618 | 0.005150872 | 0.01232735  |
| 583 | 0.005302785 | 0.0125955   |
| 271 | 0.005349705 | 0.01261212  |
| 589 | 0.005839823 | 0.0136656   |
| 45  | 0.006165188 | 0.0143209   |
| 121 | 0.006359416 | 0.01466424  |

|     |             |            |
|-----|-------------|------------|
| 558 | 0.006481494 | 0.01483744 |
| 149 | 0.006705816 | 0.01524052 |
| 160 | 0.006854083 | 0.01546622 |
| 124 | 0.006948614 | 0.01556833 |
| 647 | 0.007078454 | 0.01574755 |
| 303 | 0.007233981 | 0.01598101 |
| 87  | 0.007809766 | 0.01701767 |
| 594 | 0.007810976 | 0.01701767 |
| 536 | 0.007983025 | 0.01704753 |
| 5   | 0.008065584 | 0.01704753 |
| 1   | 0.00808396  | 0.01704753 |
| 49  | 0.008088121 | 0.01704753 |
| 641 | 0.008148316 | 0.01704753 |
| 188 | 0.008148458 | 0.01704753 |
| 120 | 0.008266799 | 0.01707095 |
| 505 | 0.008267731 | 0.01707095 |
| 89  | 0.008459466 | 0.01735342 |
| 168 | 0.008673011 | 0.0176767  |
| 551 | 0.009269431 | 0.01875969 |
| 479 | 0.009323143 | 0.01875969 |
| 40  | 0.009386477 | 0.01876759 |
| 695 | 0.009474326 | 0.01882409 |
| 534 | 0.009550873 | 0.01885758 |
| 191 | 0.009743173 | 0.01911778 |
| 315 | 0.009874502 | 0.01925587 |
| 172 | 0.010050145 | 0.01947815 |
| 571 | 0.010274025 | 0.01979063 |
| 514 | 0.010493926 | 0.02009171 |
| 194 | 0.010736067 | 0.02043149 |
| 10  | 0.010820579 | 0.02044418 |
| 166 | 0.010872167 | 0.02044418 |
| 153 | 0.01111443  | 0.02072722 |
| 511 | 0.01119717  | 0.02072722 |
| 408 | 0.01121952  | 0.02072722 |
| 154 | 0.011422682 | 0.02097986 |
| 661 | 0.011508735 | 0.02101573 |
| 221 | 0.011628236 | 0.02111191 |
| 683 | 0.01178037  | 0.0212659  |
| 465 | 0.012089209 | 0.02169942 |
| 132 | 0.012174357 | 0.0217288  |
| 48  | 0.012415339 | 0.02192458 |
| 126 | 0.012422857 | 0.02192458 |
| 559 | 0.012702167 | 0.02229298 |
| 537 | 0.012914758 | 0.0224762  |
| 22  | 0.012948855 | 0.0224762  |
| 144 | 0.013079123 | 0.02257826 |
| 560 | 0.01376193  | 0.02362234 |



|     |             |            |
|-----|-------------|------------|
| 623 | 0.013833489 | 0.02362234 |
| 178 | 0.014059022 | 0.02376306 |
| 481 | 0.014128853 | 0.02376306 |
| 590 | 0.014141559 | 0.02376306 |
| 92  | 0.014289389 | 0.023857   |
| 634 | 0.014348504 | 0.023857   |
| 327 | 0.015207838 | 0.02515342 |
| 94  | 0.015376995 | 0.02530073 |
| 51  | 0.015566708 | 0.02548017 |
| 210 | 0.015730192 | 0.0255619  |
| 624 | 0.015778469 | 0.0255619  |
| 580 | 0.015896687 | 0.02562202 |
| 314 | 0.016423844 | 0.02630334 |
| 401 | 0.016510223 | 0.02630334 |
| 648 | 0.016569181 | 0.02630334 |
| 62  | 0.016935596 | 0.02675059 |
| 452 | 0.018332302 | 0.02874236 |
| 383 | 0.018446111 | 0.02874236 |
| 510 | 0.018470059 | 0.02874236 |
| 246 | 0.018560502 | 0.02874236 |
| 413 | 0.018786428 | 0.02895031 |
| 68  | 0.018917683 | 0.02901106 |
| 615 | 0.019101233 | 0.02915103 |
| 550 | 0.019390862 | 0.02945077 |
| 190 | 0.019958628 | 0.03016805 |
| 604 | 0.021447777 | 0.03214988 |
| 540 | 0.021473307 | 0.03214988 |
| 487 | 0.022065234 | 0.03284877 |
| 274 | 0.022148067 | 0.03284877 |
| 143 | 0.02259873  | 0.03336055 |
| 312 | 0.022893711 | 0.03363881 |
| 170 | 0.023097414 | 0.033781   |
| 23  | 0.023221746 | 0.03380633 |
| 549 | 0.023477551 | 0.03402195 |
| 446 | 0.023679092 | 0.03405076 |
| 397 | 0.023713005 | 0.03405076 |
| 349 | 0.0238892   | 0.03414855 |
| 412 | 0.024351279 | 0.03465227 |
| 387 | 0.024533541 | 0.03475508 |
| 625 | 0.024879447 | 0.03508776 |
| 101 | 0.025277213 | 0.03549029 |
| 451 | 0.025985395 | 0.03632317 |
| 334 | 0.026363525 | 0.036353   |
| 632 | 0.02644183  | 0.036353   |
| 609 | 0.026458555 | 0.036353   |
| 707 | 0.026467029 | 0.036353   |
| 66  | 0.027206936 | 0.0372075  |

|     |             |            |
|-----|-------------|------------|
| 183 | 0.027640172 | 0.03763706 |
| 353 | 0.028407721 | 0.03851619 |
| 603 | 0.028558353 | 0.03855495 |
| 174 | 0.028825476 | 0.03874998 |
| 9   | 0.029282385 | 0.03915177 |
| 385 | 0.029372225 | 0.03915177 |
| 407 | 0.029646856 | 0.0392949  |
| 167 | 0.029728377 | 0.0392949  |
| 39  | 0.030229472 | 0.03954668 |
| 156 | 0.030285366 | 0.03954668 |
| 310 | 0.030337629 | 0.03954668 |
| 46  | 0.030419593 | 0.03954668 |
| 555 | 0.031301964 | 0.04035115 |
| 520 | 0.031375045 | 0.04035115 |
| 169 | 0.031421591 | 0.04035115 |
| 473 | 0.032173385 | 0.04114932 |
| 378 | 0.032730824 | 0.04159753 |
| 557 | 0.032787173 | 0.04159753 |
| 675 | 0.033418721 | 0.04206207 |
| 309 | 0.033419621 | 0.04206207 |
| 447 | 0.033748256 | 0.04230714 |
| 417 | 0.034222456 | 0.04273203 |
| 220 | 0.034599136 | 0.04303229 |
| 286 | 0.034911406 | 0.04325039 |
| 86  | 0.036058742 | 0.04449728 |
| 587 | 0.036255638 | 0.04453933 |
| 556 | 0.036374788 | 0.04453933 |
| 654 | 0.036985418 | 0.04511216 |
| 586 | 0.037697086 | 0.04580336 |
| 496 | 0.038526566 | 0.04663185 |
| 36  | 0.038859947 | 0.04685585 |
| 152 | 0.039070461 | 0.04693055 |
| 155 | 0.039240098 | 0.04695578 |
| 480 | 0.039457896 | 0.04703823 |
| 608 | 0.040676694 | 0.04830887 |
| 670 | 0.041004384 | 0.04851566 |
| 456 | 0.041806951 | 0.04928067 |
| 672 | 0.043896235 | 0.05155109 |
| 141 | 0.045458663 | 0.05318826 |
| 102 | 0.046392028 | 0.05408003 |
| 233 | 0.046703573 | 0.05424305 |
| 60  | 0.046947281 | 0.05432637 |
| 116 | 0.048447274 | 0.05585752 |
| 651 | 0.049171723 | 0.05626669 |
| 63  | 0.049236817 | 0.05626669 |
| 691 | 0.049336494 | 0.05626669 |
| 601 | 0.050152491 | 0.05699157 |

|     |             |            |
|-----|-------------|------------|
| 450 | 0.050809802 | 0.05753157 |
| 543 | 0.052017218 | 0.05868836 |
| 502 | 0.05269335  | 0.05914156 |
| 229 | 0.052947413 | 0.05914156 |
| 607 | 0.052980537 | 0.05914156 |
| 477 | 0.054132121 | 0.06021429 |
| 688 | 0.054645677 | 0.06057227 |
| 633 | 0.055678782 | 0.06150162 |
| 437 | 0.056457812 | 0.06183179 |
| 616 | 0.056487286 | 0.06183179 |
| 72  | 0.056564864 | 0.06183179 |
| 280 | 0.058400013 | 0.06361768 |
| 230 | 0.060195918 | 0.0652598  |
| 218 | 0.060320607 | 0.0652598  |
| 646 | 0.06322465  | 0.06816818 |
| 34  | 0.064008468 | 0.06860126 |
| 705 | 0.064060636 | 0.06860126 |
| 176 | 0.064586472 | 0.06893071 |
| 682 | 0.068715975 | 0.07299247 |
| 173 | 0.068854359 | 0.07299247 |
| 702 | 0.069330537 | 0.07325146 |
| 179 | 0.069650683 | 0.07334441 |
| 606 | 0.070781764 | 0.07428785 |
| 639 | 0.07266435  | 0.07601116 |
| 547 | 0.073581681 | 0.07671671 |
| 322 | 0.074064856 | 0.07696646 |
| 622 | 0.074560082 | 0.07722705 |
| 400 | 0.075314399 | 0.07731847 |
| 288 | 0.075354978 | 0.07731847 |
| 381 | 0.075473461 | 0.07731847 |
| 200 | 0.075804838 | 0.07731847 |
| 75  | 0.075872087 | 0.07731847 |
| 118 | 0.076651487 | 0.07786156 |
| 484 | 0.077540217 | 0.07851187 |
| 494 | 0.078850129 | 0.07958312 |
| 184 | 0.079681851 | 0.08016645 |
| 709 | 0.083547919 | 0.08378919 |
| 403 | 0.084814376 | 0.08479013 |
| 600 | 0.085502    | 0.08520791 |
| 392 | 0.086195978 | 0.08552235 |
| 599 | 0.086358963 | 0.08552235 |
| 377 | 0.086652283 | 0.08554466 |
| 238 | 0.088043103 | 0.08664693 |
| 219 | 0.088409229 | 0.08673704 |
| 578 | 0.089261606 | 0.08730218 |
| 448 | 0.09214682  | 0.08984589 |
| 443 | 0.093086052 | 0.09048241 |

|     |             |            |
|-----|-------------|------------|
| 519 | 0.094514339 | 0.09158893 |
| 388 | 0.095927612 | 0.09267418 |
| 438 | 0.096597856 | 0.09303718 |
| 508 | 0.097086432 | 0.09322297 |
| 133 | 0.097674586 | 0.09322297 |
| 678 | 0.097676043 | 0.09322297 |
| 203 | 0.098648651 | 0.09386765 |
| 391 | 0.09984426  | 0.09472002 |
| 453 | 0.100775334 | 0.09531707 |
| 207 | 0.105777619 | 0.09948739 |
| 638 | 0.105814315 | 0.09948739 |
| 406 | 0.10746198  | 0.1007367  |
| 137 | 0.107793735 | 0.1007488  |
| 628 | 0.10889888  | 0.1014814  |
| 566 | 0.111707182 | 0.1037923  |
| 209 | 0.112779742 | 0.1042419  |
| 189 | 0.112851063 | 0.1042419  |
| 65  | 0.113458327 | 0.1044973  |
| 64  | 0.114675321 | 0.1053112  |
| 701 | 0.115793628 | 0.1060299  |
| 136 | 0.118105288 | 0.1078341  |
| 642 | 0.120334289 | 0.1095526  |
| 276 | 0.122702462 | 0.1113876  |
| 614 | 0.125470209 | 0.1135186  |
| 84  | 0.125768618 | 0.1135186  |
| 267 | 0.127084323 | 0.1143361  |
| 30  | 0.127398179 | 0.1143361  |
| 192 | 0.12800221  | 0.1145528  |
| 356 | 0.128431105 | 0.1146013  |
| 146 | 0.128781962 | 0.1146013  |
| 88  | 0.133178352 | 0.1181807  |
| 301 | 0.133919638 | 0.1185056  |
| 215 | 0.137119364 | 0.1208746  |
| 649 | 0.137362014 | 0.1208746  |
| 242 | 0.13918263  | 0.1221224  |
| 676 | 0.13955316  | 0.1221224  |
| 114 | 0.141340111 | 0.1233445  |
| 319 | 0.145546085 | 0.126665   |
| 371 | 0.146257124 | 0.1269342  |
| 214 | 0.147059647 | 0.127281   |
| 240 | 0.147675703 | 0.127465   |
| 199 | 0.148225072 | 0.1275905  |
| 253 | 0.151012388 | 0.1296086  |
| 527 | 0.151615372 | 0.1296086  |
| 457 | 0.151800349 | 0.1296086  |
| 512 | 0.154474049 | 0.1311643  |
| 548 | 0.154677712 | 0.1311643  |

|     |             |           |
|-----|-------------|-----------|
| 232 | 0.154997806 | 0.1311643 |
| 621 | 0.155283117 | 0.1311643 |
| 69  | 0.157540053 | 0.1326664 |
| 275 | 0.157985646 | 0.1326664 |
| 107 | 0.158321311 | 0.1326664 |
| 498 | 0.161392265 | 0.1346538 |
| 18  | 0.161545518 | 0.1346538 |
| 115 | 0.16330817  | 0.1356195 |
| 698 | 0.163562668 | 0.1356195 |
| 700 | 0.164300987 | 0.135875  |
| 304 | 0.166794466 | 0.137577  |
| 655 | 0.167775629 | 0.1380259 |
| 225 | 0.168495692 | 0.1382582 |
| 605 | 0.169436392 | 0.1386699 |
| 617 | 0.17006513  | 0.1388248 |
| 518 | 0.170513922 | 0.1388325 |
| 97  | 0.171002985 | 0.1388727 |
| 277 | 0.172665432 | 0.1398633 |
| 360 | 0.17472124  | 0.1411666 |
| 565 | 0.175616403 | 0.1415278 |
| 382 | 0.178790776 | 0.1437194 |
| 656 | 0.179874455 | 0.1442235 |
| 414 | 0.18054686  | 0.1443962 |
| 21  | 0.182267681 | 0.1454043 |
| 59  | 0.183395513 | 0.1455823 |
| 38  | 0.183412459 | 0.1455823 |
| 138 | 0.186140006 | 0.1468422 |
| 216 | 0.186228851 | 0.1468422 |
| 54  | 0.18639413  | 0.1468422 |
| 323 | 0.188690104 | 0.1482812 |
| 211 | 0.190526351 | 0.1493303 |
| 328 | 0.190970507 | 0.1493303 |
| 427 | 0.192159897 | 0.1498893 |
| 122 | 0.192712122 | 0.1499498 |
| 428 | 0.193711783 | 0.1503573 |
| 20  | 0.196319907 | 0.1520082 |
| 674 | 0.19842923  | 0.1532658 |
| 627 | 0.19951217  | 0.1537264 |
| 131 | 0.200318485 | 0.1537791 |
| 104 | 0.200554145 | 0.1537791 |
| 37  | 0.203627306 | 0.1557575 |
| 157 | 0.212897168 | 0.1624548 |
| 432 | 0.217112665 | 0.1652723 |
| 687 | 0.218780708 | 0.165778  |
| 345 | 0.218826567 | 0.165778  |
| 227 | 0.221241131 | 0.1672062 |
| 482 | 0.231107262 | 0.1742459 |

|     |             |           |
|-----|-------------|-----------|
| 553 | 0.232572997 | 0.1749335 |
| 513 | 0.233943842 | 0.1755466 |
| 255 | 0.23578795  | 0.1765111 |
| 372 | 0.236888977 | 0.1769161 |
| 71  | 0.237931247 | 0.1772754 |
| 685 | 0.238677412 | 0.1774129 |
| 703 | 0.240121698 | 0.1780675 |
| 354 | 0.241105312 | 0.1783782 |
| 185 | 0.245067418 | 0.1808859 |
| 386 | 0.250858231 | 0.1847285 |
| 202 | 0.253546716 | 0.1862741 |
| 440 | 0.25849657  | 0.18947   |
| 32  | 0.261274152 | 0.1910626 |
| 715 | 0.264234213 | 0.1927809 |
| 545 | 0.26594587  | 0.1935826 |
| 302 | 0.270974263 | 0.1967894 |
| 441 | 0.274035109 | 0.1985558 |
| 696 | 0.275233293 | 0.1989676 |
| 472 | 0.277229853 | 0.1999534 |
| 673 | 0.278731065 | 0.2005782 |
| 228 | 0.28080936  | 0.2009983 |
| 679 | 0.280960609 | 0.2009983 |
| 671 | 0.281223615 | 0.2009983 |
| 47  | 0.287112058 | 0.2047437 |
| 665 | 0.290238589 | 0.2065071 |
| 418 | 0.293343548 | 0.2075116 |
| 455 | 0.293592858 | 0.2075116 |
| 241 | 0.294280224 | 0.2075116 |
| 283 | 0.294495877 | 0.2075116 |
| 82  | 0.295069619 | 0.2075116 |
| 662 | 0.295763084 | 0.2075116 |
| 719 | 0.296248451 | 0.2075116 |
| 663 | 0.301242723 | 0.210127  |
| 471 | 0.301312506 | 0.210127  |
| 177 | 0.303971825 | 0.2115146 |
| 296 | 0.305386282 | 0.2120318 |
| 162 | 0.317613829 | 0.2200379 |
| 198 | 0.32340188  | 0.2235575 |
| 466 | 0.328167052 | 0.2259984 |
| 265 | 0.328540176 | 0.2259984 |
| 611 | 0.329220159 | 0.2259984 |
| 307 | 0.330078496 | 0.2259984 |
| 239 | 0.33106618  | 0.2259984 |
| 652 | 0.331225216 | 0.2259984 |
| 175 | 0.333505154 | 0.2268598 |
| 76  | 0.33392399  | 0.2268598 |
| 159 | 0.33518434  | 0.2270668 |

|     |             |           |
|-----|-------------|-----------|
| 659 | 0.33605604  | 0.2270668 |
| 58  | 0.336421774 | 0.2270668 |
| 324 | 0.33818944  | 0.2270668 |
| 85  | 0.338569534 | 0.2270668 |
| 395 | 0.3387819   | 0.2270668 |
| 311 | 0.340106271 | 0.2270668 |
| 610 | 0.34030274  | 0.2270668 |
| 596 | 0.34069763  | 0.2270668 |
| 405 | 0.341585171 | 0.2271791 |
| 55  | 0.349460932 | 0.2319287 |
| 284 | 0.352610428 | 0.2335284 |
| 298 | 0.355090511 | 0.2337051 |
| 254 | 0.355153629 | 0.2337051 |
| 201 | 0.356131788 | 0.2337051 |
| 74  | 0.356174539 | 0.2337051 |
| 195 | 0.356576173 | 0.2337051 |
| 106 | 0.360033723 | 0.2350596 |
| 83  | 0.360130953 | 0.2350596 |
| 581 | 0.365555874 | 0.2381085 |
| 379 | 0.366349381 | 0.2381344 |
| 264 | 0.367580701 | 0.2384441 |
| 716 | 0.369208377 | 0.2388064 |
| 33  | 0.369651065 | 0.2388064 |
| 217 | 0.373437007 | 0.2407599 |
| 686 | 0.37646567  | 0.2421873 |
| 70  | 0.377605597 | 0.2421873 |
| 351 | 0.378440253 | 0.2421873 |
| 335 | 0.378717599 | 0.2421873 |
| 488 | 0.380156699 | 0.2426165 |
| 409 | 0.385105957 | 0.2442876 |
| 367 | 0.385788268 | 0.2442876 |
| 27  | 0.386340803 | 0.2442876 |
| 677 | 0.386897666 | 0.2442876 |
| 333 | 0.387661916 | 0.2442876 |
| 501 | 0.387835695 | 0.2442876 |
| 619 | 0.388188179 | 0.2442876 |
| 15  | 0.38986896  | 0.2448576 |
| 593 | 0.393221107 | 0.2462954 |
| 108 | 0.393717537 | 0.2462954 |
| 77  | 0.394589741 | 0.2463532 |
| 142 | 0.397787675 | 0.2478599 |
| 297 | 0.404197987 | 0.2513584 |
| 163 | 0.408813703 | 0.2537293 |
| 357 | 0.411111026 | 0.2546548 |
| 150 | 0.420638962 | 0.2600468 |
| 499 | 0.422293377 | 0.2605597 |
| 93  | 0.426461577 | 0.2626186 |

|     |             |           |
|-----|-------------|-----------|
| 380 | 0.428514267 | 0.2633692 |
| 347 | 0.43208157  | 0.2647161 |
| 113 | 0.432381638 | 0.2647161 |
| 208 | 0.436522564 | 0.2667344 |
| 430 | 0.441393566 | 0.2681368 |
| 680 | 0.441425306 | 0.2681368 |
| 493 | 0.441924858 | 0.2681368 |
| 404 | 0.44340105  | 0.2681368 |
| 226 | 0.443473739 | 0.2681368 |
| 389 | 0.443910347 | 0.2681368 |
| 368 | 0.446784593 | 0.2693579 |
| 509 | 0.449118958 | 0.2702495 |
| 507 | 0.452829882 | 0.27186   |
| 657 | 0.453516391 | 0.27186   |
| 526 | 0.456610944 | 0.2731966 |
| 316 | 0.462787659 | 0.2763688 |
| 475 | 0.464036702 | 0.2765918 |
| 78  | 0.469325643 | 0.2792175 |
| 424 | 0.470824469 | 0.2795827 |
| 464 | 0.47319549  | 0.2804635 |
| 579 | 0.475915875 | 0.2815476 |
| 196 | 0.478747333 | 0.2822994 |
| 53  | 0.479593365 | 0.2822994 |
| 291 | 0.479867528 | 0.2822994 |
| 636 | 0.481011799 | 0.2824466 |
| 658 | 0.484734802 | 0.2841046 |
| 43  | 0.48775895  | 0.2853477 |
| 213 | 0.488814674 | 0.2854367 |
| 574 | 0.490307354 | 0.2857801 |
| 613 | 0.49644124  | 0.2883025 |
| 411 | 0.496460124 | 0.2883025 |
| 486 | 0.501926883 | 0.2909423 |
| 535 | 0.502917246 | 0.2909824 |
| 318 | 0.507867445 | 0.2933094 |
| 689 | 0.511953891 | 0.2950115 |
| 425 | 0.512939158 | 0.2950115 |
| 643 | 0.513616225 | 0.2950115 |
| 620 | 0.518299409 | 0.2971611 |
| 415 | 0.520577198 | 0.2976303 |
| 348 | 0.521002065 | 0.2976303 |
| 644 | 0.523680969 | 0.2986207 |
| 690 | 0.526546538 | 0.2997138 |
| 321 | 0.529460673 | 0.3008305 |
| 140 | 0.53132334  | 0.3013468 |
| 331 | 0.532566728 | 0.3013731 |
| 329 | 0.533790575 | 0.3013731 |
| 433 | 0.534231647 | 0.3013731 |



|     |             |           |
|-----|-------------|-----------|
| 365 | 0.537085203 | 0.3019246 |
| 396 | 0.537120699 | 0.3019246 |
| 491 | 0.543513627 | 0.3048445 |
| 3   | 0.544245197 | 0.3048445 |
| 539 | 0.545995647 | 0.3052837 |
| 305 | 0.554546608 | 0.3090419 |
| 287 | 0.554673632 | 0.3090419 |
| 375 | 0.55651869  | 0.3094548 |
| 325 | 0.557373897 | 0.3094548 |
| 79  | 0.559388626 | 0.3100285 |
| 263 | 0.562309903 | 0.3111018 |
| 500 | 0.565592346 | 0.3123708 |
| 708 | 0.568996605 | 0.3135803 |
| 660 | 0.569767618 | 0.3135803 |
| 495 | 0.573444914 | 0.3150553 |
| 598 | 0.578057949 | 0.3170121 |
| 278 | 0.5790456   | 0.3170121 |
| 61  | 0.580017094 | 0.3170121 |
| 681 | 0.583785708 | 0.3183142 |
| 2   | 0.58441459  | 0.3183142 |
| 250 | 0.58581375  | 0.318527  |
| 640 | 0.591587515 | 0.3211138 |
| 317 | 0.600101227 | 0.324634  |
| 704 | 0.600128017 | 0.324634  |
| 631 | 0.60623962  | 0.3266526 |
| 469 | 0.606525621 | 0.3266526 |
| 111 | 0.607940111 | 0.3266526 |
| 718 | 0.607995725 | 0.3266526 |
| 523 | 0.617269189 | 0.3310718 |
| 697 | 0.61851117  | 0.3311757 |
| 281 | 0.620847165 | 0.3315205 |
| 504 | 0.622949097 | 0.3315205 |
| 474 | 0.623011228 | 0.3315205 |
| 204 | 0.623352848 | 0.3315205 |
| 110 | 0.627797794 | 0.3333233 |
| 645 | 0.634712654 | 0.3364293 |
| 109 | 0.636625865 | 0.3364565 |
| 531 | 0.636894036 | 0.3364565 |
| 251 | 0.639069238 | 0.337042  |
| 98  | 0.642280189 | 0.3381708 |
| 28  | 0.644278786 | 0.3385556 |
| 449 | 0.645154329 | 0.3385556 |
| 290 | 0.647526477 | 0.3392369 |
| 112 | 0.655886111 | 0.3430476 |
| 123 | 0.662634024 | 0.3460041 |
| 445 | 0.66436828  | 0.3463372 |
| 224 | 0.665531005 | 0.3463718 |

|     |             |           |
|-----|-------------|-----------|
| 653 | 0.668142395 | 0.3471589 |
| 629 | 0.673809055 | 0.3483524 |
| 151 | 0.674112802 | 0.3483524 |
| 530 | 0.674842473 | 0.3483524 |
| 454 | 0.674850047 | 0.3483524 |
| 181 | 0.678534483 | 0.3485289 |
| 554 | 0.679678155 | 0.3485289 |
| 262 | 0.680474115 | 0.3485289 |
| 81  | 0.680948209 | 0.3485289 |
| 161 | 0.681167704 | 0.3485289 |
| 669 | 0.68181167  | 0.3485289 |
| 342 | 0.68472464  | 0.3493267 |
| 96  | 0.68593119  | 0.3493267 |
| 626 | 0.686689622 | 0.3493267 |
| 80  | 0.688249346 | 0.3495572 |
| 12  | 0.695161136 | 0.352271  |
| 575 | 0.695822708 | 0.352271  |
| 684 | 0.697741995 | 0.3526775 |
| 529 | 0.699523622 | 0.3530132 |
| 180 | 0.707047751 | 0.3562412 |
| 711 | 0.708293668 | 0.3563006 |
| 532 | 0.717446741 | 0.3603312 |
| 119 | 0.720633866 | 0.3613574 |
| 11  | 0.725824328 | 0.3633834 |
| 393 | 0.737911723 | 0.3681786 |
| 332 | 0.738564247 | 0.3681786 |
| 442 | 0.738898662 | 0.3681786 |
| 308 | 0.740340455 | 0.3683161 |
| 103 | 0.746595561 | 0.3705731 |
| 542 | 0.747223307 | 0.3705731 |
| 337 | 0.752043904 | 0.3723792 |
| 14  | 0.75332929  | 0.3724319 |
| 90  | 0.755807689 | 0.3730733 |
| 524 | 0.760567318 | 0.3743969 |
| 73  | 0.760859296 | 0.3743969 |
| 158 | 0.763431069 | 0.3750781 |
| 470 | 0.76653051  | 0.3759271 |
| 8   | 0.767538942 | 0.3759271 |
| 29  | 0.769407024 | 0.3762587 |
| 597 | 0.772737361 | 0.3773032 |
| 91  | 0.776178753 | 0.3783987 |
| 384 | 0.777466746 | 0.3784426 |
| 521 | 0.779498194 | 0.3785197 |
| 212 | 0.780021522 | 0.3785197 |
| 35  | 0.784082743 | 0.3799069 |
| 13  | 0.789143038 | 0.3817732 |
| 285 | 0.79102707  | 0.3820995 |

|     |             |           |
|-----|-------------|-----------|
| 223 | 0.792575398 | 0.3822629 |
| 717 | 0.801773478 | 0.3856901 |
| 444 | 0.802123013 | 0.3856901 |
| 630 | 0.803840646 | 0.3859286 |
| 577 | 0.805689816 | 0.3862294 |
| 517 | 0.808910381 | 0.3871857 |
| 272 | 0.813681676 | 0.3888511 |
| 394 | 0.815462143 | 0.3888511 |
| 552 | 0.816082384 | 0.3888511 |
| 572 | 0.817571705 | 0.3889741 |
| 279 | 0.81972588  | 0.3892349 |
| 591 | 0.82058408  | 0.3892349 |
| 205 | 0.824702431 | 0.3906019 |
| 533 | 0.826998571 | 0.391103  |
| 366 | 0.830590313 | 0.3922145 |
| 56  | 0.837928345 | 0.3940528 |
| 270 | 0.838044331 | 0.3940528 |
| 602 | 0.838225268 | 0.3940528 |
| 7   | 0.842522008 | 0.3954841 |
| 522 | 0.847983614 | 0.3974573 |
| 4   | 0.853962991 | 0.3992512 |
| 410 | 0.854338711 | 0.3992512 |
| 269 | 0.856689204 | 0.3997583 |
| 338 | 0.857991412 | 0.3997755 |
| 343 | 0.863039133 | 0.4015352 |
| 592 | 0.866904398 | 0.4027404 |
| 463 | 0.872110832 | 0.4045642 |
| 699 | 0.883590722 | 0.4092886 |
| 257 | 0.897231261 | 0.4144191 |
| 497 | 0.897290216 | 0.4144191 |
| 344 | 0.901109535 | 0.4155755 |
| 666 | 0.905733579 | 0.4170991 |
| 582 | 0.907540116 | 0.4172166 |
| 462 | 0.909125344 | 0.4172166 |
| 435 | 0.909950743 | 0.4172166 |
| 336 | 0.91721518  | 0.4180192 |
| 182 | 0.919282613 | 0.4180192 |
| 234 | 0.919427788 | 0.4180192 |
| 282 | 0.919848691 | 0.4180192 |
| 426 | 0.920242792 | 0.4180192 |
| 31  | 0.920817235 | 0.4180192 |
| 44  | 0.920963809 | 0.4180192 |
| 528 | 0.92376355  | 0.4186884 |
| 503 | 0.927635356 | 0.4189812 |
| 399 | 0.927741594 | 0.4189812 |
| 439 | 0.928388379 | 0.4189812 |
| 99  | 0.934072429 | 0.4209451 |

|     |             |           |
|-----|-------------|-----------|
| 252 | 0.935414961 | 0.4209496 |
| 694 | 0.938094165 | 0.4215548 |
| 125 | 0.942012096 | 0.4227141 |
| 339 | 0.948074395 | 0.4242799 |
| 17  | 0.948187567 | 0.4242799 |
| 713 | 0.955667198 | 0.4270219 |
| 236 | 0.977289314 | 0.4352836 |
| 52  | 0.977929816 | 0.4352836 |
| 206 | 0.978632732 | 0.4352836 |
| 313 | 0.980811844 | 0.4352836 |
| 341 | 0.981046039 | 0.4352836 |
| 235 | 0.984029424 | 0.4359949 |
| 573 | 0.985986018 | 0.43625   |
| 57  | 0.989211233 | 0.4370649 |
| 147 | 0.991415401 | 0.4374269 |
| 434 | 0.994650556 | 0.4378427 |
| 398 | 0.995129572 | 0.4378427 |
| 431 | 0.996979856 | 0.4380467 |

Supplemental Table T1B. List of p-values for PDND vs. PDID and their corresponding q-values.

| Metabolite No. | p-value (PDND vs. PDID) | q-value     |
|----------------|-------------------------|-------------|
| 125            | 1.86402E-06             | 0.000773113 |
| 110            | 4.94976E-06             | 0.001028739 |
| 53             | 0.00013578              | 0.0164299   |
| 575            | 0.000208232             | 0.0164299   |
| 545            | 0.000227485             | 0.0164299   |
| 389            | 0.000243703             | 0.0164299   |
| 265            | 0.000276696             | 0.0164299   |
| 574            | 0.000458329             | 0.02381318  |
| 508            | 0.000709799             | 0.03278105  |
| 318            | 0.000798743             | 0.03319992  |
| 331            | 0.001053582             | 0.03964362  |
| 509            | 0.001144523             | 0.03964362  |
| 597            | 0.00148035              | 0.04332602  |
| 439            | 0.001536389             | 0.04332602  |
| 464            | 0.001644052             | 0.04332602  |
| 628            | 0.00166778              | 0.04332602  |
| 90             | 0.001979466             | 0.04839819  |
| 297            | 0.002135635             | 0.04931562  |
| 418            | 0.00298143              | 0.06217146  |
| 476            | 0.002991514             | 0.06423357  |
| 552            | 0.003245274             | 0.06217146  |
| 714            | 0.003517943             | 0.06646547  |
| 484            | 0.004067655             | 0.07350997  |
| 532            | 0.004448402             | 0.07547055  |
| 32             | 0.004539286             | 0.07547055  |
| 328            | 0.005030985             | 0.07941083  |
| 711            | 0.005158382             | 0.07941083  |
| 646            | 0.005683827             | 0.08171254  |
| 533            | 0.006013529             | 0.08204441  |
| 300            | 0.006380901             | 0.08171254  |
| 223            | 0.006494991             | 0.08204441  |
| 290            | 0.006669449             | 0.08171254  |
| 367            | 0.006889291             | 0.08171254  |
| 627            | 0.007245799             | 0.08171254  |
| 562            | 0.007252845             | 0.08204441  |
| 624            | 0.007345375             | 0.08171254  |
| 639            | 0.007386817             | 0.08171254  |
| 382            | 0.007654037             | 0.08468801  |
| 561            | 0.007707153             | 0.08171254  |
| 469            | 0.008256216             | 0.08171254  |
| 379            | 0.008346631             | 0.08171254  |
| 210            | 0.008399807             | 0.08171254  |
| 34             | 0.008453317             | 0.08630174  |

|     |             |            |
|-----|-------------|------------|
| 548 | 0.008749455 | 0.08171254 |
| 623 | 0.009077961 | 0.08669168 |
| 470 | 0.009079812 | 0.08171254 |
| 716 | 0.009576125 | 0.08171254 |
| 208 | 0.009966227 | 0.08669168 |
| 230 | 0.01037188  | 0.08753455 |
| 598 | 0.010695545 | 0.08669168 |
| 271 | 0.010696358 | 0.08171254 |
| 108 | 0.01084553  | 0.08171254 |
| 473 | 0.011161573 | 0.08669168 |
| 440 | 0.011600716 | 0.0891129  |
| 632 | 0.011874246 | 0.08916158 |
| 128 | 0.012006007 | 0.08916158 |
| 151 | 0.012309001 | 0.0891129  |
| 372 | 0.012453041 | 0.0891129  |
| 479 | 0.012656096 | 0.08916158 |
| 249 | 0.01330204  | 0.09215035 |
| 50  | 0.01387765  | 0.09456188 |
| 412 | 0.014345406 | 0.09567577 |
| 296 | 0.014579504 | 0.09567577 |
| 596 | 0.014731669 | 0.09567577 |
| 183 | 0.01520958  | 0.09725991 |
| 166 | 0.016007122 | 0.100809   |
| 160 | 0.016286277 | 0.1010362  |
| 595 | 0.01658644  | 0.1013851  |
| 386 | 0.017139332 | 0.1032464  |
| 129 | 0.01773027  | 0.1052803  |
| 334 | 0.01849724  | 0.1058742  |
| 77  | 0.018702254 | 0.1065938  |
| 351 | 0.018770142 | 0.1065938  |
| 560 | 0.018849149 | 0.1058742  |
| 696 | 0.019606334 | 0.1065938  |
| 523 | 0.019627614 | 0.1065938  |
| 117 | 0.019815982 | 0.1065938  |
| 345 | 0.020474683 | 0.1065938  |
| 531 | 0.020883102 | 0.1075342  |
| 511 | 0.020987328 | 0.1076488  |
| 253 | 0.021065527 | 0.1076488  |
| 275 | 0.021359841 | 0.1077096  |
| 673 | 0.021924866 | 0.1065938  |
| 444 | 0.021930802 | 0.1058742  |
| 385 | 0.022105513 | 0.1065938  |
| 570 | 0.022321099 | 0.1065938  |
| 498 | 0.022364417 | 0.1065938  |
| 83  | 0.022716486 | 0.1058742  |
| 558 | 0.022892118 | 0.1065938  |
| 667 | 0.023080465 | 0.1076488  |

|     |             |           |
|-----|-------------|-----------|
| 291 | 0.023542795 | 0.1065938 |
| 82  | 0.024033298 | 0.1065938 |
| 45  | 0.024093674 | 0.1065938 |
| 637 | 0.024344849 | 0.1094531 |
| 134 | 0.02461772  | 0.1095457 |
| 392 | 0.025279546 | 0.1095545 |
| 306 | 0.025703571 | 0.1095457 |
| 712 | 0.025847578 | 0.1065938 |
| 46  | 0.026282419 | 0.1065938 |
| 204 | 0.026355142 | 0.1095457 |
| 429 | 0.026620836 | 0.1103336 |
| 622 | 0.027075582 | 0.1095457 |
| 218 | 0.027918527 | 0.1105793 |
| 258 | 0.028057043 | 0.1105793 |
| 192 | 0.028546056 | 0.1117421 |
| 89  | 0.028845014 | 0.1105793 |
| 594 | 0.029088965 | 0.1105793 |
| 615 | 0.029115822 | 0.1105793 |
| 609 | 0.029216119 | 0.1105793 |
| 298 | 0.029264179 | 0.1105793 |
| 466 | 0.029840767 | 0.1105793 |
| 79  | 0.030879246 | 0.1145984 |
| 245 | 0.031683415 | 0.1150564 |
| 229 | 0.032034722 | 0.1154375 |
| 572 | 0.032425939 | 0.1150564 |
| 544 | 0.032532796 | 0.1150564 |
| 65  | 0.032578267 | 0.1150564 |
| 502 | 0.032663517 | 0.1150564 |
| 589 | 0.033049416 | 0.1150564 |
| 678 | 0.034050406 | 0.1179427 |
| 608 | 0.035110203 | 0.1206085 |
| 522 | 0.035611211 | 0.1213268 |
| 654 | 0.036217979 | 0.1222462 |
| 243 | 0.036576502 | 0.1222462 |
| 625 | 0.036763371 | 0.1225336 |
| 186 | 0.037158928 | 0.1225336 |
| 355 | 0.037502754 | 0.1222462 |
| 69  | 0.037734214 | 0.1225336 |
| 567 | 0.038105057 | 0.1227787 |
| 40  | 0.038501406 | 0.1231015 |
| 80  | 0.038993397 | 0.1237228 |
| 6   | 0.039834959 | 0.1251664 |
| 391 | 0.040050648 | 0.1251664 |
| 411 | 0.040567619 | 0.1255218 |
| 590 | 0.040860937 | 0.1255218 |
| 417 | 0.041070313 | 0.1255218 |
| 144 | 0.041847529 | 0.1267137 |

|     |             |           |
|-----|-------------|-----------|
| 581 | 0.042070026 | 0.1267137 |
| 198 | 0.042704547 | 0.1272095 |
| 424 | 0.042846722 | 0.1272956 |
| 384 | 0.043426739 | 0.1272095 |
| 612 | 0.043690614 | 0.1272956 |
| 388 | 0.043794472 | 0.1272956 |
| 86  | 0.044516912 | 0.1282145 |
| 505 | 0.044727552 | 0.1282145 |
| 556 | 0.045693989 | 0.1292194 |
| 573 | 0.045699867 | 0.1292194 |
| 244 | 0.046845021 | 0.1315624 |
| 357 | 0.047197008 | 0.131604  |
| 200 | 0.047504144 | 0.131604  |
| 686 | 0.047809694 | 0.131604  |
| 642 | 0.049385659 | 0.1335115 |
| 525 | 0.049591371 | 0.1335332 |
| 468 | 0.049612397 | 0.1335115 |
| 310 | 0.050388033 | 0.1339318 |
| 157 | 0.050617011 | 0.1335115 |
| 510 | 0.05072198  | 0.1335115 |
| 287 | 0.050751121 | 0.1335115 |
| 390 | 0.051080634 | 0.1335115 |
| 175 | 0.051555352 | 0.1335115 |
| 658 | 0.052423276 | 0.1353407 |
| 217 | 0.052992445 | 0.1355669 |
| 197 | 0.053163237 | 0.1355669 |
| 402 | 0.055619864 | 0.1409665 |
| 703 | 0.056675054 | 0.1427703 |
| 240 | 0.057177678 | 0.1431688 |
| 383 | 0.05762704  | 0.1434299 |
| 187 | 0.059089783 | 0.1459714 |
| 709 | 0.059725995 | 0.1459714 |
| 239 | 0.059954095 | 0.1459714 |
| 87  | 0.060439446 | 0.1459714 |
| 114 | 0.060970311 | 0.1459714 |
| 333 | 0.061000153 | 0.1459714 |
| 405 | 0.061106437 | 0.1459714 |
| 313 | 0.062432142 | 0.148286  |
| 616 | 0.064334595 | 0.1519364 |
| 282 | 0.064828806 | 0.1522386 |
| 162 | 0.06878744  | 0.1606272 |
| 442 | 0.070044231 | 0.1626482 |
| 378 | 0.070519537 | 0.1627181 |
| 702 | 0.071292421 | 0.1627181 |
| 695 | 0.07129302  | 0.1627181 |
| 233 | 0.071640245 | 0.1627181 |
| 29  | 0.074902231 | 0.1684537 |



|     |             |           |
|-----|-------------|-----------|
| 363 | 0.07497602  | 0.1684537 |
| 707 | 0.076014201 | 0.1694194 |
| 329 | 0.076220999 | 0.1694194 |
| 220 | 0.077030381 | 0.1703077 |
| 483 | 0.078047042 | 0.1716424 |
| 528 | 0.078494888 | 0.1717188 |
| 202 | 0.081058668 | 0.1757555 |
| 387 | 0.082256026 | 0.1757555 |
| 330 | 0.082343076 | 0.1757555 |
| 449 | 0.082948712 | 0.1757555 |
| 547 | 0.08312133  | 0.1757555 |
| 123 | 0.083501815 | 0.1757555 |
| 557 | 0.083617579 | 0.1757555 |
| 153 | 0.083722887 | 0.1757555 |
| 462 | 0.085765543 | 0.1791388 |
| 550 | 0.086440003 | 0.1796448 |
| 127 | 0.087722157 | 0.1814025 |
| 126 | 0.088360335 | 0.1818176 |
| 72  | 0.089095285 | 0.1824268 |
| 421 | 0.091536778 | 0.1854641 |
| 694 | 0.092157368 | 0.1854641 |
| 100 | 0.092724589 | 0.1854641 |
| 536 | 0.092959793 | 0.1854641 |
| 221 | 0.093016465 | 0.1854641 |
| 199 | 0.093412066 | 0.1854641 |
| 521 | 0.093702047 | 0.1854641 |
| 277 | 0.095646814 | 0.1884161 |
| 529 | 0.096630878 | 0.1890553 |
| 650 | 0.096880954 | 0.1890553 |
| 377 | 0.099243126 | 0.1927599 |
| 94  | 0.100770291 | 0.1934684 |
| 58  | 0.101075495 | 0.1934684 |
| 433 | 0.101629164 | 0.1934684 |
| 540 | 0.101818617 | 0.1934684 |
| 604 | 0.101935176 | 0.1934684 |
| 395 | 0.103230244 | 0.1950358 |
| 327 | 0.105301833 | 0.1980495 |
| 214 | 0.105821012 | 0.1981169 |
| 599 | 0.107679404 | 0.198128  |
| 139 | 0.10812076  | 0.1981169 |
| 490 | 0.108556448 | 0.1986438 |
| 216 | 0.10885934  | 0.1981169 |
| 146 | 0.109207437 | 0.1981169 |
| 507 | 0.109210588 | 0.1981169 |
| 364 | 0.109471034 | 0.1981169 |
| 649 | 0.109627459 | 0.2002339 |
| 322 | 0.110110297 | 0.2003713 |

|     |             |           |
|-----|-------------|-----------|
| 587 | 0.110874827 | 0.1981169 |
| 142 | 0.112244111 | 0.1981169 |
| 516 | 0.112803188 | 0.1981169 |
| 656 | 0.11669271  | 0.2038081 |
| 1   | 0.116942585 | 0.2038081 |
| 61  | 0.117046096 | 0.2038081 |
| 171 | 0.117449956 | 0.2038081 |
| 435 | 0.117656431 | 0.2038081 |
| 641 | 0.117848291 | 0.2038081 |
| 56  | 0.119388605 | 0.2038081 |
| 184 | 0.119405325 | 0.2052557 |
| 371 | 0.119569041 | 0.2038081 |
| 105 | 0.119758166 | 0.2052557 |
| 420 | 0.120131671 | 0.2038081 |
| 683 | 0.121763089 | 0.2038081 |
| 286 | 0.121972566 | 0.2038081 |
| 687 | 0.123989681 | 0.2078088 |
| 99  | 0.125035691 | 0.208184  |
| 319 | 0.125215296 | 0.2083159 |
| 174 | 0.126188449 | 0.208184  |
| 668 | 0.126296965 | 0.2083159 |
| 132 | 0.127305049 | 0.2091487 |
| 593 | 0.1281876   | 0.2097695 |
| 626 | 0.129229459 | 0.2102028 |
| 163 | 0.129463816 | 0.2102028 |
| 430 | 0.131627131 | 0.2128836 |
| 203 | 0.133200177 | 0.2142482 |
| 189 | 0.134054804 | 0.2142482 |
| 168 | 0.134396831 | 0.2146258 |
| 569 | 0.134532624 | 0.2142482 |
| 353 | 0.135286091 | 0.2142482 |
| 178 | 0.137135313 | 0.2154732 |
| 428 | 0.137189855 | 0.2155122 |
| 422 | 0.137589235 | 0.2154732 |
| 406 | 0.137893824 | 0.2154732 |
| 165 | 0.139185114 | 0.2155122 |
| 55  | 0.139361889 | 0.2155122 |
| 699 | 0.13947426  | 0.2154732 |
| 643 | 0.140915309 | 0.2169324 |
| 674 | 0.143984208 | 0.2208389 |
| 130 | 0.147450416 | 0.2253238 |
| 155 | 0.150525968 | 0.2264521 |
| 64  | 0.151369541 | 0.2264521 |
| 12  | 0.151422333 | 0.2264521 |
| 179 | 0.152684852 | 0.2279098 |
| 169 | 0.15271447  | 0.2279098 |
| 73  | 0.153000016 | 0.2264521 |

|     |             |           |
|-----|-------------|-----------|
| 708 | 0.153166388 | 0.2279098 |
| 698 | 0.153271946 | 0.2264521 |
| 662 | 0.153376438 | 0.2264521 |
| 88  | 0.153636905 | 0.2264521 |
| 84  | 0.155495698 | 0.2264521 |
| 485 | 0.15579091  | 0.2264521 |
| 416 | 0.156270843 | 0.2296281 |
| 119 | 0.158353778 | 0.2297968 |
| 657 | 0.15855393  | 0.2264521 |
| 131 | 0.160307356 | 0.2297968 |
| 400 | 0.160638766 | 0.2296281 |
| 295 | 0.160689489 | 0.2297968 |
| 517 | 0.161040259 | 0.2297968 |
| 312 | 0.161434644 | 0.2297968 |
| 360 | 0.164359897 | 0.2331622 |
| 359 | 0.165094401 | 0.2334076 |
| 307 | 0.166429024 | 0.2337579 |
| 453 | 0.166466942 | 0.2343573 |
| 285 | 0.167457626 | 0.2344377 |
| 257 | 0.16807908  | 0.2337579 |
| 138 | 0.169416288 | 0.2347885 |
| 539 | 0.169757907 | 0.2347885 |
| 568 | 0.17014747  | 0.2347885 |
| 2   | 0.170590061 | 0.2352296 |
| 135 | 0.171476497 | 0.2347885 |
| 606 | 0.172691161 | 0.2361166 |
| 489 | 0.174178615 | 0.236536  |
| 586 | 0.174612445 | 0.236536  |
| 542 | 0.175272    | 0.236536  |
| 663 | 0.175274178 | 0.236536  |
| 576 | 0.185487854 | 0.2495094 |
| 106 | 0.189768138 | 0.2544436 |
| 248 | 0.190995836 | 0.2552663 |
| 410 | 0.195475749 | 0.2604164 |
| 225 | 0.198165913 | 0.2612431 |
| 92  | 0.198328756 | 0.2612431 |
| 136 | 0.198462357 | 0.2612431 |
| 317 | 0.198610371 | 0.2612431 |
| 167 | 0.201943441 | 0.2647893 |
| 13  | 0.203266524 | 0.2649224 |
| 207 | 0.203319646 | 0.2649224 |
| 368 | 0.206217412 | 0.2678584 |
| 607 | 0.209238945 | 0.2709365 |
| 356 | 0.210637744 | 0.2719007 |
| 281 | 0.213268428 | 0.274214  |
| 316 | 0.213749307 | 0.274214  |
| 267 | 0.215295005 | 0.2753472 |

|     |             |           |
|-----|-------------|-----------|
| 362 | 0.216195787 | 0.275651  |
| 54  | 0.218275902 | 0.2774521 |
| 141 | 0.220341614 | 0.279224  |
| 354 | 0.223775981 | 0.281025  |
| 241 | 0.225446067 | 0.281025  |
| 465 | 0.226093723 | 0.281025  |
| 369 | 0.22652319  | 0.2822329 |
| 85  | 0.228112456 | 0.2823579 |
| 78  | 0.228829925 | 0.281025  |
| 212 | 0.228899909 | 0.281025  |
| 427 | 0.22922947  | 0.281025  |
| 680 | 0.229342012 | 0.281025  |
| 644 | 0.230463373 | 0.281025  |
| 255 | 0.23061733  | 0.281025  |
| 456 | 0.230744813 | 0.2837761 |
| 3   | 0.230919513 | 0.2838634 |
| 361 | 0.231228361 | 0.281025  |
| 467 | 0.232901217 | 0.2839456 |
| 26  | 0.23368369  | 0.281025  |
| 474 | 0.236603326 | 0.281025  |
| 425 | 0.237351243 | 0.2839456 |
| 76  | 0.238622786 | 0.2839456 |
| 555 | 0.238674883 | 0.2837761 |
| 688 | 0.23887984  | 0.2839456 |
| 309 | 0.238953736 | 0.281025  |
| 349 | 0.239710217 | 0.281025  |
| 159 | 0.241840777 | 0.2837761 |
| 374 | 0.242120123 | 0.2839456 |
| 170 | 0.242487352 | 0.2837761 |
| 408 | 0.243466008 | 0.2839456 |
| 438 | 0.243484827 | 0.2837761 |
| 543 | 0.243948787 | 0.2851859 |
| 621 | 0.244561582 | 0.2854804 |
| 293 | 0.246315973 | 0.2839456 |
| 205 | 0.247257089 | 0.2837761 |
| 583 | 0.249124079 | 0.2868392 |
| 263 | 0.251761751 | 0.2890754 |
| 209 | 0.253163566 | 0.2898013 |
| 37  | 0.253788391 | 0.2898013 |
| 268 | 0.255926858 | 0.2914426 |
| 515 | 0.259117485 | 0.2932601 |
| 156 | 0.25958914  | 0.2932601 |
| 452 | 0.259639559 | 0.2932601 |
| 710 | 0.26170023  | 0.294515  |
| 358 | 0.26216765  | 0.294515  |
| 482 | 0.265455537 | 0.2965409 |
| 398 | 0.265782649 | 0.2965409 |

|     |             |           |
|-----|-------------|-----------|
| 659 | 0.266111412 | 0.2972227 |
| 81  | 0.267561815 | 0.2972227 |
| 399 | 0.268153386 | 0.2965409 |
| 648 | 0.271434336 | 0.2993138 |
| 666 | 0.27277971  | 0.2993138 |
| 496 | 0.272967128 | 0.2993138 |
| 477 | 0.274133045 | 0.2993138 |
| 600 | 0.274390032 | 0.2993138 |
| 133 | 0.274851067 | 0.2993138 |
| 582 | 0.27641779  | 0.2993138 |
| 120 | 0.276427381 | 0.2993138 |
| 448 | 0.276699649 | 0.2993138 |
| 320 | 0.277612746 | 0.2993138 |
| 526 | 0.278578908 | 0.2993138 |
| 661 | 0.279308739 | 0.2993138 |
| 564 | 0.279957141 | 0.2993138 |
| 340 | 0.280121483 | 0.2993138 |
| 488 | 0.286619357 | 0.3054716 |
| 122 | 0.288290163 | 0.3062591 |
| 559 | 0.288956866 | 0.3062591 |
| 514 | 0.289568646 | 0.3062591 |
| 492 | 0.293006151 | 0.3090618 |
| 44  | 0.294584243 | 0.3090618 |
| 36  | 0.294838669 | 0.3090618 |
| 459 | 0.295563981 | 0.3090618 |
| 74  | 0.29593646  | 0.3095295 |
| 213 | 0.297128971 | 0.3090618 |
| 461 | 0.302447509 | 0.313876  |
| 370 | 0.303109959 | 0.313876  |
| 404 | 0.304309775 | 0.313876  |
| 206 | 0.304564859 | 0.313876  |
| 326 | 0.305076968 | 0.313876  |
| 494 | 0.31195744  | 0.3197496 |
| 512 | 0.312324472 | 0.3198969 |
| 380 | 0.313310118 | 0.3198969 |
| 292 | 0.314047299 | 0.3198969 |
| 653 | 0.314777226 | 0.3197496 |
| 25  | 0.317417304 | 0.3215799 |
| 228 | 0.317980717 | 0.3215799 |
| 350 | 0.32480822  | 0.3276874 |
| 264 | 0.326164328 | 0.3282588 |
| 481 | 0.327005379 | 0.3283103 |
| 580 | 0.332034476 | 0.3325562 |
| 713 | 0.333423586 | 0.3331448 |
| 219 | 0.336748665 | 0.3351759 |
| 348 | 0.337069186 | 0.3351759 |
| 684 | 0.343848681 | 0.3411013 |

|     |             |           |
|-----|-------------|-----------|
| 534 | 0.346364811 | 0.3420534 |
| 232 | 0.346809434 | 0.3420534 |
| 14  | 0.347277247 | 0.3420534 |
| 181 | 0.350443213 | 0.3443557 |
| 256 | 0.352056748 | 0.3448227 |
| 426 | 0.352577655 | 0.3448227 |
| 500 | 0.35615888  | 0.3475075 |
| 365 | 0.36102466  | 0.3502144 |
| 701 | 0.362310253 | 0.3502144 |
| 95  | 0.362418801 | 0.3506825 |
| 638 | 0.362707462 | 0.3502144 |
| 341 | 0.363146055 | 0.3502144 |
| 718 | 0.364475088 | 0.3502144 |
| 640 | 0.367308731 | 0.3525927 |
| 677 | 0.368629168 | 0.3530449 |
| 394 | 0.371127459 | 0.3546205 |
| 584 | 0.375074245 | 0.3575697 |
| 373 | 0.378744273 | 0.35998   |
| 513 | 0.379347691 | 0.35998   |
| 66  | 0.380366043 | 0.35998   |
| 446 | 0.381715862 | 0.35998   |
| 164 | 0.382670082 | 0.35998   |
| 262 | 0.382798905 | 0.35998   |
| 437 | 0.38637868  | 0.3625262 |
| 52  | 0.388479609 | 0.3636765 |
| 665 | 0.390326022 | 0.3645839 |
| 149 | 0.393216897 | 0.3664606 |
| 685 | 0.394822836 | 0.3671341 |
| 499 | 0.396002687 | 0.3674093 |
| 614 | 0.396924647 | 0.3674445 |
| 176 | 0.400089273 | 0.3676826 |
| 67  | 0.400730936 | 0.3683872 |
| 31  | 0.40078519  | 0.3676826 |
| 339 | 0.401560851 | 0.3676826 |
| 419 | 0.402450548 | 0.3676826 |
| 692 | 0.403320514 | 0.3676826 |
| 266 | 0.403374018 | 0.3683872 |
| 39  | 0.405448079 | 0.3676826 |
| 269 | 0.40591958  | 0.3676826 |
| 571 | 0.412003938 | 0.3730944 |
| 376 | 0.419151062 | 0.3779957 |
| 57  | 0.419235294 | 0.3780741 |
| 332 | 0.420231812 | 0.3779957 |
| 121 | 0.425402923 | 0.3818998 |
| 107 | 0.428188848 | 0.3830543 |
| 423 | 0.428762459 | 0.3830936 |
| 501 | 0.429453598 | 0.3830543 |

|     |             |           |
|-----|-------------|-----------|
| 601 | 0.430419389 | 0.3830543 |
| 445 | 0.432094862 | 0.3837631 |
| 432 | 0.433492628 | 0.3841836 |
| 124 | 0.436460458 | 0.3859909 |
| 311 | 0.439935223 | 0.3879323 |
| 283 | 0.440933349 | 0.3879323 |
| 338 | 0.441455617 | 0.3879323 |
| 215 | 0.446816236 | 0.390494  |
| 226 | 0.447968804 | 0.390494  |
| 33  | 0.448897241 | 0.390494  |
| 527 | 0.450504528 | 0.390494  |
| 611 | 0.451459246 | 0.390494  |
| 30  | 0.451973684 | 0.390494  |
| 158 | 0.452104033 | 0.390494  |
| 431 | 0.453202851 | 0.390494  |
| 471 | 0.45342363  | 0.3924453 |
| 335 | 0.453765492 | 0.390494  |
| 201 | 0.457311188 | 0.390494  |
| 273 | 0.457921277 | 0.3924453 |
| 104 | 0.461400757 | 0.394089  |
| 671 | 0.461735476 | 0.394089  |
| 506 | 0.475339202 | 0.4048683 |
| 308 | 0.478006997 | 0.406308  |
| 602 | 0.482377572 | 0.4088012 |
| 375 | 0.482988489 | 0.4088012 |
| 280 | 0.483890722 | 0.4088012 |
| 71  | 0.486293696 | 0.409998  |
| 193 | 0.48734237  | 0.4100504 |
| 115 | 0.489676279 | 0.4105263 |
| 137 | 0.489883361 | 0.4105263 |
| 472 | 0.494933097 | 0.4139235 |
| 366 | 0.497566913 | 0.4152906 |
| 147 | 0.50051252  | 0.416912  |
| 549 | 0.501544655 | 0.4169362 |
| 270 | 0.504950072 | 0.4182536 |
| 259 | 0.505141969 | 0.4182536 |
| 610 | 0.507925244 | 0.4191887 |
| 222 | 0.508341794 | 0.4191887 |
| 645 | 0.509900597 | 0.4191887 |
| 495 | 0.511719118 | 0.4191887 |
| 403 | 0.511873701 | 0.4191887 |
| 518 | 0.512322369 | 0.4191887 |
| 443 | 0.515655354 | 0.4210869 |
| 315 | 0.518673326 | 0.4227209 |
| 182 | 0.521540265 | 0.4236963 |
| 28  | 0.521908845 | 0.4236963 |
| 5   | 0.526478434 | 0.4265729 |

|     |             |           |
|-----|-------------|-----------|
| 381 | 0.528724374 | 0.4266953 |
| 109 | 0.529107849 | 0.4266953 |
| 617 | 0.530756665 | 0.4266953 |
| 238 | 0.531559781 | 0.4266953 |
| 447 | 0.53244322  | 0.4266953 |
| 97  | 0.532788966 | 0.4266953 |
| 250 | 0.535614766 | 0.4281044 |
| 276 | 0.537161865 | 0.4281044 |
| 672 | 0.537638343 | 0.4281044 |
| 352 | 0.541942454 | 0.4301396 |
| 8   | 0.542263875 | 0.4301396 |
| 305 | 0.544590533 | 0.4307285 |
| 49  | 0.545078842 | 0.4307285 |
| 636 | 0.548635056 | 0.432716  |
| 681 | 0.555762998 | 0.4375077 |
| 475 | 0.561531573 | 0.4405069 |
| 145 | 0.561692411 | 0.4405069 |
| 118 | 0.571173334 | 0.4455754 |
| 651 | 0.571226341 | 0.4455754 |
| 603 | 0.571889104 | 0.4455754 |
| 272 | 0.57244323  | 0.4455754 |
| 579 | 0.575522597 | 0.4471349 |
| 242 | 0.581935189 | 0.4512731 |
| 4   | 0.583020435 | 0.4512731 |
| 247 | 0.584276139 | 0.4514045 |
| 236 | 0.58639953  | 0.4517421 |
| 24  | 0.586886726 | 0.4517421 |
| 605 | 0.589889239 | 0.4532139 |
| 719 | 0.592841945 | 0.4546421 |
| 294 | 0.595082527 | 0.4555199 |
| 16  | 0.601858437 | 0.4597027 |
| 588 | 0.602758749 | 0.4597027 |
| 676 | 0.605994358 | 0.4609347 |
| 191 | 0.606592078 | 0.4609347 |
| 337 | 0.610114663 | 0.4627654 |
| 535 | 0.612902717 | 0.4640334 |
| 413 | 0.618250773 | 0.4658693 |
| 102 | 0.618996356 | 0.4663744 |
| 347 | 0.619363852 | 0.4658693 |
| 304 | 0.619810934 | 0.4663744 |
| 91  | 0.623671708 | 0.4658693 |
| 323 | 0.625097182 | 0.4663744 |
| 697 | 0.625102357 | 0.4663744 |
| 96  | 0.625804315 | 0.4658693 |
| 634 | 0.62710172  | 0.4663744 |
| 7   | 0.627329405 | 0.4663744 |
| 194 | 0.628337123 | 0.4663744 |



|     |             |           |
|-----|-------------|-----------|
| 342 | 0.638248375 | 0.4728864 |
| 21  | 0.644039896 | 0.4763284 |
| 112 | 0.647057368 | 0.4772305 |
| 618 | 0.647918789 | 0.4772305 |
| 289 | 0.649290992 | 0.4772305 |
| 592 | 0.654125395 | 0.4772305 |
| 47  | 0.654996031 | 0.4772305 |
| 631 | 0.656082972 | 0.4772305 |
| 578 | 0.656136557 | 0.4785526 |
| 441 | 0.657146324 | 0.4785526 |
| 251 | 0.657284786 | 0.4791335 |
| 254 | 0.657377059 | 0.4772305 |
| 172 | 0.657889237 | 0.4785526 |
| 38  | 0.663592354 | 0.4772305 |
| 111 | 0.664273249 | 0.4785526 |
| 530 | 0.665143915 | 0.4785526 |
| 152 | 0.665318574 | 0.4785526 |
| 497 | 0.668037967 | 0.4772305 |
| 565 | 0.668765778 | 0.4772305 |
| 177 | 0.66899817  | 0.4785526 |
| 717 | 0.66927509  | 0.4772305 |
| 22  | 0.670073867 | 0.4785526 |
| 493 | 0.672039966 | 0.4785526 |
| 15  | 0.678276505 | 0.4821026 |
| 27  | 0.678524274 | 0.4821026 |
| 224 | 0.682164199 | 0.483241  |
| 520 | 0.682792042 | 0.483241  |
| 504 | 0.683820711 | 0.483241  |
| 563 | 0.684776819 | 0.4837228 |
| 63  | 0.686623414 | 0.483241  |
| 237 | 0.689991199 | 0.4850839 |
| 278 | 0.690889475 | 0.4850839 |
| 288 | 0.692597333 | 0.485463  |
| 705 | 0.699694845 | 0.4896122 |
| 491 | 0.702513127 | 0.4907581 |
| 613 | 0.705798549 | 0.4922259 |
| 60  | 0.710534925 | 0.4946991 |
| 173 | 0.712617953 | 0.4953197 |
| 93  | 0.716043737 | 0.4968699 |
| 20  | 0.718931638 | 0.4980424 |
| 706 | 0.72636518  | 0.5007408 |
| 336 | 0.72693891  | 0.5008132 |
| 234 | 0.726950678 | 0.5007408 |
| 690 | 0.728643516 | 0.5007408 |
| 591 | 0.728850348 | 0.5007408 |
| 487 | 0.730160653 | 0.5019721 |
| 682 | 0.734990246 | 0.5007408 |

|     |             |           |
|-----|-------------|-----------|
| 652 | 0.735885849 | 0.5025064 |
| 150 | 0.737178775 | 0.5025064 |
| 231 | 0.737790407 | 0.5019721 |
| 227 | 0.737888658 | 0.5029385 |
| 260 | 0.740017405 | 0.5019721 |
| 18  | 0.741091977 | 0.5019721 |
| 211 | 0.743898629 | 0.5019721 |
| 700 | 0.744149124 | 0.5029385 |
| 486 | 0.746449723 | 0.5036744 |
| 458 | 0.750363254 | 0.5054944 |
| 48  | 0.755391112 | 0.5080581 |
| 551 | 0.761106616 | 0.5110752 |
| 454 | 0.763246732 | 0.5116857 |
| 704 | 0.766131092 | 0.5127923 |
| 101 | 0.767434036 | 0.5128386 |
| 59  | 0.772261953 | 0.5152365 |
| 407 | 0.775537161 | 0.5165924 |
| 401 | 0.776873697 | 0.5166547 |
| 480 | 0.779845748 | 0.5178028 |
| 19  | 0.782331256 | 0.5186246 |
| 325 | 0.786702911 | 0.5200024 |
| 566 | 0.787207986 | 0.5200024 |
| 299 | 0.78913155  | 0.5200024 |
| 154 | 0.789413811 | 0.5200024 |
| 303 | 0.792114369 | 0.5209557 |
| 397 | 0.794697305 | 0.5218288 |
| 457 | 0.796791317 | 0.5220912 |
| 630 | 0.799616475 | 0.5220912 |
| 396 | 0.800720632 | 0.5220912 |
| 11  | 0.800841859 | 0.5220912 |
| 541 | 0.801377295 | 0.5220912 |
| 344 | 0.809958505 | 0.5248839 |
| 246 | 0.811180721 | 0.5250328 |
| 635 | 0.81272124  | 0.5248839 |
| 620 | 0.813652487 | 0.5260319 |
| 503 | 0.814479694 | 0.5248839 |
| 554 | 0.815878563 | 0.5248839 |
| 252 | 0.816464355 | 0.5248839 |
| 23  | 0.816497969 | 0.5248839 |
| 116 | 0.817029124 | 0.5248839 |
| 196 | 0.81852403  | 0.5248839 |
| 629 | 0.821347265 | 0.5248839 |
| 103 | 0.829351413 | 0.5298157 |
| 647 | 0.830551876 | 0.5298157 |
| 450 | 0.831391619 | 0.5298157 |
| 655 | 0.832353917 | 0.5298157 |
| 619 | 0.835178379 | 0.5308007 |

|     |             |           |
|-----|-------------|-----------|
| 301 | 0.841752823 | 0.5336754 |
| 43  | 0.842269459 | 0.5336754 |
| 664 | 0.845934502 | 0.5351818 |
| 633 | 0.852297406 | 0.5378505 |
| 414 | 0.852740705 | 0.5378505 |
| 75  | 0.85673701  | 0.5395523 |
| 42  | 0.858672659 | 0.5399533 |
| 235 | 0.864803095 | 0.5412538 |
| 41  | 0.866380003 | 0.5412538 |
| 188 | 0.866492226 | 0.5412538 |
| 302 | 0.866735727 | 0.5412538 |
| 434 | 0.867251836 | 0.5412538 |
| 455 | 0.873137064 | 0.5441098 |
| 346 | 0.876740354 | 0.5448252 |
| 10  | 0.876906494 | 0.5448344 |
| 679 | 0.880328893 | 0.5448344 |
| 35  | 0.880612768 | 0.5448252 |
| 463 | 0.880853736 | 0.5458993 |
| 143 | 0.883888691 | 0.5448344 |
| 537 | 0.895166592 | 0.5520443 |
| 274 | 0.898776885 | 0.5529532 |
| 546 | 0.900458423 | 0.5529532 |
| 538 | 0.900722523 | 0.5529532 |
| 478 | 0.90196173  | 0.5536451 |
| 261 | 0.904422211 | 0.5529532 |
| 17  | 0.907171096 | 0.5545112 |
| 460 | 0.909284863 | 0.554987  |
| 343 | 0.911448655 | 0.555492  |
| 415 | 0.913184444 | 0.5557351 |
| 691 | 0.915231083 | 0.5561663 |
| 185 | 0.917891292 | 0.5567723 |
| 113 | 0.918907385 | 0.5567723 |
| 180 | 0.924531822 | 0.5573554 |
| 324 | 0.924560483 | 0.5573554 |
| 68  | 0.924868829 | 0.5573554 |
| 70  | 0.925879801 | 0.5573554 |
| 675 | 0.926957597 | 0.5582241 |
| 393 | 0.92791521  | 0.5582241 |
| 321 | 0.930937349 | 0.5573554 |
| 436 | 0.932952212 | 0.5582241 |
| 577 | 0.933390553 | 0.5573554 |
| 161 | 0.937431733 | 0.5598355 |
| 669 | 0.939640391 | 0.5603494 |
| 51  | 0.941773562 | 0.5608169 |
| 451 | 0.943686618 | 0.5608357 |
| 190 | 0.9452697   | 0.5608357 |
| 524 | 0.948650886 | 0.5608357 |

|     |             |           |
|-----|-------------|-----------|
| 9   | 0.949278826 | 0.5608357 |
| 140 | 0.949505239 | 0.5608357 |
| 284 | 0.950428734 | 0.5608357 |
| 195 | 0.951397641 | 0.5608357 |
| 314 | 0.952599467 | 0.5608357 |
| 670 | 0.956839109 | 0.5625349 |
| 62  | 0.959707231 | 0.5634242 |
| 553 | 0.962781903 | 0.5634983 |
| 715 | 0.963832519 | 0.5638588 |
| 660 | 0.963900562 | 0.5634983 |
| 585 | 0.965873759 | 0.5634983 |
| 409 | 0.971545427 | 0.5663743 |
| 689 | 0.973803676 | 0.5668957 |
| 693 | 0.975798782 | 0.5672627 |
| 148 | 0.98096118  | 0.5690767 |
| 519 | 0.981657449 | 0.5690767 |
| 98  | 0.994555557 | 0.5757509 |
| 279 | 0.998012995 | 0.5769488 |

Supplemental Table T2. List of positively identified metabolites based on accurate mass and retention time match to the dansyl standard library.

| Name                            | HMDB ID   | Accurate mass (Da) | Dansylated mass (Da) | Library retention time (min) | Average Peak Pair Ratio (Control) | Average Peak Pair Ratio (PD) | Fold change | p value |
|---------------------------------|-----------|--------------------|----------------------|------------------------------|-----------------------------------|------------------------------|-------------|---------|
| Hypoxanthine + H <sub>2</sub> O | HMDB00157 | 136.0385           | 388.1098             | 2.12                         | 0.9237                            | 0.9384                       | 1.0159      | 0.7675  |
| 1-Methylhistidine               | HMDB00001 | 169.0851           | 403.1434             | 2.17                         | 0.9770                            | 0.8759                       | 0.8965      | 0.0108  |
| Taurine                         | HMDB00251 | 125.0147           | 359.0730             | 2.24                         | 0.9298                            | 0.9171                       | 0.9864      | 0.7258  |
| L-Arginine                      | HMDB00517 | 174.1117           | 408.1700             | 2.44                         | 0.9233                            | 0.8127                       | 0.8802      | 0.0001  |
| L-Asparagine                    | HMDB00168 | 132.0535           | 366.1118             | 3.00                         | 0.9257                            | 0.8979                       | 0.9700      | 0.2036  |
| L-Glutamine                     | HMDB00641 | 146.0691           | 380.1275             | 3.32                         | 0.9519                            | 0.9470                       | 0.9948      | 0.4878  |
| Citrulline                      | HMDB00904 | 175.0957           | 409.1540             | 3.74                         | 0.9669                            | 0.7978                       | 0.8251      | 0.0000  |
| Methionine Sulfoxide            | HMDB02005 | 165.0460           | 399.1043             | 3.72                         | 0.7405                            | 0.8977                       | 1.2123      | 0.0156  |
| L-Homoserine                    | HMDB00719 | 119.0582           | 353.1166             | 4.05                         | 0.9410                            | 0.9120                       | 0.9692      | 0.5800  |
| Methionine Sulfoxide - Isomer   | HMDB02005 | 165.0460           | 399.1043             | 4.20                         | 0.7219                            | 0.8937                       | 1.2380      | 0.0169  |
| L-Serine                        | HMDB00187 | 105.0426           | 339.1009             | 4.40                         | 0.8962                            | 0.8587                       | 0.9582      | 0.1135  |
| L-Glutamic Acid                 | HMDB00148 | 147.0532           | 381.1115             | 5.05                         | 0.8538                            | 0.8957                       | 1.0491      | 0.3946  |
| L-Aspartic Acid                 | HMDB00191 | 133.0375           | 367.0958             | 5.16                         | 0.8495                            | 0.8933                       | 1.0515      | 0.2951  |
| Trans-4-Hydroxyl-L-Proline      | HMDB00725 | 131.0582           | 365.1166             | 5.17                         | 0.9888                            | 1.0471                       | 1.0589      | 0.3601  |
| N <sup>6</sup> -Acetyl-L-Lysine | HMDB00206 | 188.1161           | 422.1744             | 5.71                         | 0.9186                            | 0.8535                       | 0.9291      | 0.0143  |
| L-Threonine                     | HMDB00167 | 119.0582           | 353.1166             | 5.79                         | 0.8498                            | 0.9167                       | 1.0788      | 0.0154  |
| Aminoadipic acid                | HMDB00510 | 161.0688           | 395.1271             | 5.97                         | 0.8971                            | 0.8938                       | 0.9963      | 0.9341  |
| Ethanolamine                    | HMDB      | 61.0528            | 295.1111             | 6.00                         | 0.9027                            | 0.9592                       | 1.0625      | 0.0253  |

|                                |               |          |          |       |        |        |        |        |
|--------------------------------|---------------|----------|----------|-------|--------|--------|--------|--------|
|                                | 00149         |          |          |       |        |        |        |        |
| Glycine                        | HMDB<br>00123 | 75.0320  | 309.0903 | 6.59  | 0.9358 | 0.9748 | 1.0416 | 0.0064 |
| L-Alanine                      | HMDB<br>00161 | 89.0477  | 323.1060 | 7.57  | 0.9713 | 0.9564 | 0.9846 | 0.0391 |
| Gamma-<br>Aminobutyric acid    | HMDB<br>00112 | 103.0633 | 337.1216 | 7.79  | 0.9509 | 0.9260 | 0.9738 | 0.3352 |
| Uridine                        | HMDB<br>00296 | 244.0695 | 478.1279 | 7.84  | 0.9395 | 0.8480 | 0.9026 | 0.0019 |
| Pantothenic acid               | HMDB<br>00210 | 219.1107 | 453.1690 | 8.37  | 0.9102 | 0.6891 | 0.7571 | 0.0101 |
| Hypoxanthine                   | HMDB<br>00157 | 136.0385 | 370.0968 | 8.73  | 0.8842 | 0.9770 | 1.1049 | 0.0797 |
| 2-Aminoisobutyric<br>acid      | HMDB<br>01906 | 103.0633 | 337.1216 | 8.91  | 0.8451 | 0.9158 | 1.0837 | 0.2451 |
| Uridine - H2O                  | HMDB<br>00296 | 244.0695 | 460.1173 | 8.67  | 0.9371 | 0.8309 | 0.8867 | 0.0004 |
| Xanthine                       | HMDB<br>00292 | 152.0334 | 386.0917 | 8.95  | 0.9850 | 0.8390 | 0.8517 | 0.0200 |
| Glycyl-Valine                  | HMDB<br>28854 | 174.1004 | 408.1588 | 9.19  | 0.6544 | 0.9510 | 1.4532 | 0.0097 |
| L-Alpha-<br>aminobutyric acid  | HMDB<br>00452 | 103.0633 | 337.1216 | 9.13  | 0.8280 | 0.8610 | 1.0399 | 0.3566 |
| L-Glutamic Acid -<br>H2O       | HMDB<br>00148 | 147.0532 | 363.1009 | 9.46  | 0.9513 | 0.9914 | 1.0421 | 0.4365 |
| Methylamine                    | HMDB<br>00164 | 31.0422  | 265.1005 | 9.82  | 1.6430 | 1.6264 | 0.9899 | 0.7800 |
| L-Aspartyl-L-<br>phenylalanine | HMDB<br>00706 | 280.1059 | 514.1642 | 10.07 | 0.7760 | 0.8530 | 1.0992 | 0.1685 |
| L-Proline                      | HMDB<br>00162 | 115.0633 | 349.1216 | 10.18 | 0.9725 | 0.9828 | 1.0106 | 0.2212 |
| L-Valine                       | HMDB<br>00883 | 117.0790 | 351.1373 | 10.81 | 0.9161 | 0.8850 | 0.9661 | 0.0880 |
| L-Methionine                   | HMDB<br>00696 | 149.0510 | 383.1094 | 10.89 | 1.4577 | 1.1860 | 0.8136 | 0.1392 |
| L-Tryptophan                   | HMDB<br>00929 | 204.0899 | 438.1482 | 11.44 | 0.8661 | 0.7359 | 0.8497 | 0.0000 |
| L-Kynurenine                   | HMDB<br>00684 | 208.0848 | 442.1431 | 11.44 | 1.7386 | 1.5041 | 0.8651 | 0.0000 |
| Glycyl-<br>Phenylalanine       | HMDB<br>28848 | 222.1004 | 456.1588 | 11.65 | 0.8488 | 0.8380 | 0.9873 | 0.8137 |
| L-Phenylalanine                | HMDB<br>00159 | 165.0790 | 399.1373 | 12.74 | 0.8073 | 0.7703 | 0.9543 | 0.1339 |

|                               |            |          |          |       |        |        |        |        |
|-------------------------------|------------|----------|----------|-------|--------|--------|--------|--------|
| Vanillylmandelic acid         | HMDB 00291 | 198.0528 | 432.1111 | 12.81 | 0.3532 | 1.3415 | 3.7981 | 0.0000 |
| L-Isoleucine                  | HMDB 00172 | 131.0946 | 365.1529 | 13.06 | 0.8894 | 0.8572 | 0.9638 | 0.3301 |
| L-Pipecolic acid              | HMDB 00716 | 129.0790 | 363.1373 | 13.45 | 0.8705 | 0.6964 | 0.8000 | 0.0099 |
| L-leucine                     | HMDB 00687 | 131.0946 | 365.1529 | 13.36 | 0.8830 | 0.8433 | 0.9550 | 0.1455 |
| Urocanic acid                 | HMDB 00301 | 138.0429 | 372.1012 | 13.52 | 0.7015 | 0.7643 | 1.0894 | 0.1887 |
| L-Cystathionine - Isomer      | HMDB 00099 | 222.0674 | 345.0920 | 13.69 | 0.9857 | 1.0544 | 1.0697 | 0.5574 |
| 5-Hydroxylysine               | HMDB 00450 | 162.1004 | 315.1085 | 13.88 | 0.8719 | 0.9307 | 1.0674 | 0.1910 |
| L-Cystine                     | HMDB 00192 | 240.0238 | 354.0702 | 14.11 | 0.8501 | 0.8544 | 1.0051 | 0.8630 |
| Theophylline                  | HMDB 01889 | 180.0647 | 414.1230 | 15.42 | 1.2695 | 0.6073 | 0.4784 | 0.0000 |
| Phenyl-Leucine                | NA         | 278.1631 | 512.2214 | 15.90 | 0.7490 | 0.7936 | 1.0596 | 0.4285 |
| Ornithine                     | HMDB 00214 | 132.0899 | 300.1033 | 16.58 | 0.8229 | 0.8848 | 1.0752 | 0.0862 |
| 3-Aminoisobutanoic acid - H2O | HMDB 03911 | 103.0633 | 319.1110 | 16.29 | 0.9512 | 0.9735 | 1.0234 | 0.7379 |
| Phenylalanylphenylalanine     | HMDB 13302 | 312.1474 | 546.2057 | 16.55 | 0.8044 | 0.7615 | 0.9467 | 0.3388 |
| 3-Hydroxyphenylacetic acid    | HMDB 00440 | 152.0473 | 386.1057 | 16.72 | 0.9189 | 0.9056 | 0.9855 | 0.8543 |
| p-Hydroxyphenylacetic acid    | HMDB 00020 | 152.0473 | 386.1057 | 16.91 | 0.9656 | 1.0179 | 1.0542 | 0.4965 |
| L-Lysine                      | HMDB 00182 | 146.1055 | 307.1111 | 17.47 | 0.8595 | 0.8241 | 0.9588 | 0.1922 |
| Vanillic acid                 | HMDB 00484 | 168.0423 | 402.1006 | 17.34 | 0.4441 | 1.5441 | 3.4770 | 0.0000 |
| 4-Hydroxybenzoic acid         | HMDB 00500 | 138.0317 | 372.0900 | 17.57 | 0.9440 | 0.9065 | 0.9602 | 0.2171 |
| Desaminotyrosine              | HMDB 02199 | 166.0630 | 400.1213 | 18.04 | 0.9563 | 0.8265 | 0.8643 | 0.2585 |
| L-Histidine                   | HMDB 00177 | 155.0695 | 389.1278 | 18.09 | 0.9064 | 0.8699 | 0.9597 | 0.0931 |
| Indole-3-                     | HMDB       | 161.0477 | 395.1060 | 19.27 | 0.9570 | 0.8733 | 0.9126 | 0.0093 |

|                               |               |          |          |       |        |        |        |        |
|-------------------------------|---------------|----------|----------|-------|--------|--------|--------|--------|
| carboxylic acid               | 03320         |          |          |       |        |        |        |        |
| 1,4-diaminobutane             | HMDB<br>01414 | 88.1000  | 278.1083 | 21.27 | 1.0035 | 0.9671 | 0.9638 | 0.5029 |
| 3-Hydroxymandelic acid - COOH | HMDB<br>00750 | 168.0423 | 356.0951 | 21.64 | 0.9627 | 0.9094 | 0.9446 | 0.0235 |
| L-Tyrosine                    | HMDB<br>00158 | 181.0739 | 324.5953 | 22.65 | 0.8215 | 0.7283 | 0.8864 | 0.0034 |
| Hydroxykynurenine             | HMDB<br>00732 | 224.0797 | 346.0985 | 24.00 | 0.5755 | 0.9479 | 2.7326 | 0.0000 |
| Phenol                        | HMDB<br>00228 | 94.0419  | 328.1002 | 23.16 | 0.6177 | 0.5513 | 0.8926 | 0.0565 |
| Serotonin                     | HMDB<br>00259 | 176.0950 | 322.1058 | 24.65 | 1.2032 | 0.9554 | 0.7941 | 0.0041 |



Supplemental Table T3. Metabolites putatively identified based on accurate mass searches against the human metabolites in HMDB and the predicted human metabolites with one metabolic reaction.

| Retention time (second) | Accurate mass (Da) | Dansylated mass (Da) | matches in HMDB*   | matches in EML Library* |
|-------------------------|--------------------|----------------------|--------------------|-------------------------|
| 124.05                  | 155.0685           | 389.1268             | <a href="#">1</a>  | <a href="#">14</a>      |
| 125.42                  | 141.0184           | 375.0767             | <a href="#">1</a>  | <a href="#">7</a>       |
| 126.56                  | 169.0038           | 403.0621             | <a href="#">1</a>  | <a href="#">9</a>       |
| 136.25                  | 132.0895           | 366.1479             | <a href="#">2</a>  | <a href="#">19</a>      |
| 136.40                  | 117.0778           | 351.1361             | <a href="#">5</a>  | <a href="#">38</a>      |
| 142.45                  | 261.0301           | 495.0885             | <a href="#">0</a>  | <a href="#">19</a>      |
| 147.28                  | 179.0788           | 413.1371             | <a href="#">3</a>  | <a href="#">42</a>      |
| 148.82                  | 42.0213            | 276.0796             | <a href="#">0</a>  | <a href="#">3</a>       |
| 153.06                  | 180.0625           | 414.1208             | <a href="#">17</a> | <a href="#">87</a>      |
| 153.56                  | 240.0227           | 474.0810             | <a href="#">1</a>  | <a href="#">3</a>       |
| 154.28                  | 121.0187           | 355.0770             | <a href="#">2</a>  | <a href="#">15</a>      |
| 156.32                  | 146.1051           | 380.1634             | <a href="#">4</a>  | <a href="#">23</a>      |
| 159.10                  | 198.0746           | 432.1329             | <a href="#">1</a>  | <a href="#">33</a>      |
| 159.79                  | 132.0888           | 366.1472             | <a href="#">2</a>  | <a href="#">17</a>      |
| 162.27                  | 179.0789           | 413.1372             | <a href="#">3</a>  | <a href="#">42</a>      |
| 162.86                  | 116.0704           | 350.1287             | <a href="#">0</a>  | <a href="#">1</a>       |
| 163.27                  | 87.0317            | 321.0900             | <a href="#">1</a>  | <a href="#">18</a>      |
| 164.40                  | 151.0296           | 385.0879             | <a href="#">0</a>  | <a href="#">17</a>      |
| 167.64                  | 121.0187           | 355.0770             | <a href="#">2</a>  | <a href="#">15</a>      |
| 167.99                  | 297.0446           | 531.1029             | <a href="#">1</a>  | <a href="#">5</a>       |
| 168.72                  | 180.0625           | 414.1208             | <a href="#">17</a> | <a href="#">87</a>      |
| 169.92                  | 115.0624           | 349.1207             | <a href="#">2</a>  | <a href="#">33</a>      |
| 172.25                  | 275.1111           | 509.1694             | <a href="#">2</a>  | <a href="#">19</a>      |
| 172.51                  | 129.0422           | 363.1005             | <a href="#">5</a>  | <a href="#">28</a>      |
| 173.49                  | 149.0679           | 383.1262             | <a href="#">4</a>  | <a href="#">36</a>      |
| 177.49                  | 148.0477           | 382.1061             | <a href="#">2</a>  | <a href="#">37</a>      |
| 183.26                  | 190.0578           | 424.1162             | <a href="#">1</a>  | <a href="#">15</a>      |
| 186.62                  | 234.0840           | 468.1423             | <a href="#">1</a>  | <a href="#">13</a>      |
| 188.75                  | 188.1518           | 422.2101             | <a href="#">1</a>  | <a href="#">5</a>       |
| 192.23                  | 268.0802           | 502.1385             | <a href="#">4</a>  | <a href="#">25</a>      |
| 194.90                  | 222.0672           | 456.1255             | <a href="#">3</a>  | <a href="#">32</a>      |
| 195.01                  | 146.1047           | 380.1630             | <a href="#">4</a>  | <a href="#">23</a>      |
| 203.36                  | 281.1114           | 515.1698             | <a href="#">4</a>  | <a href="#">42</a>      |
| 204.96                  | 180.0625           | 414.1208             | <a href="#">17</a> | <a href="#">87</a>      |
| 214.46                  | 188.1263           | 422.1846             | <a href="#">1</a>  | <a href="#">7</a>       |
| 214.75                  | 237.0839           | 471.1422             | <a href="#">6</a>  | <a href="#">57</a>      |
| 218.55                  | 202.1421           | 436.2004             | <a href="#">2</a>  | <a href="#">6</a>       |

|        |          |          |           |           |
|--------|----------|----------|-----------|-----------|
| 224.99 | 87.0324  | 321.0907 | <u>1</u>  | <u>18</u> |
| 228.95 | 162.0523 | 396.1106 | <u>5</u>  | <u>81</u> |
| 228.98 | 221.0893 | 455.1476 | <u>7</u>  | <u>53</u> |
| 229.40 | 276.1314 | 510.1897 | <u>1</u>  | <u>19</u> |
| 230.72 | 248.0996 | 482.1579 | <u>0</u>  | <u>20</u> |
| 233.19 | 204.0741 | 438.1324 | <u>2</u>  | <u>22</u> |
| 249.83 | 558.0881 | 513.1024 | <u>0</u>  | <u>1</u>  |
| 252.16 | 164.0681 | 398.1264 | <u>6</u>  | <u>74</u> |
| 253.23 | 554.0776 | 511.0971 | <u>0</u>  | <u>1</u>  |
| 254.95 | 505.1514 | 739.2098 | <u>0</u>  | <u>2</u>  |
| 255.62 | 114.0085 | 291.0626 | <u>0</u>  | <u>1</u>  |
| 256.26 | 132.0219 | 300.0693 | <u>0</u>  | <u>4</u>  |
| 259.37 | 527.1553 | 994.2646 | <u>0</u>  | <u>5</u>  |
| 259.88 | 204.0742 | 438.1325 | <u>2</u>  | <u>22</u> |
| 261.97 | 180.0629 | 414.1212 | <u>17</u> | <u>87</u> |
| 277.04 | 180.0625 | 414.1209 | <u>17</u> | <u>87</u> |
| 277.57 | 91.0269  | 325.0852 | <u>0</u>  | <u>4</u>  |
| 288.09 | 158.0433 | 392.1017 | <u>1</u>  | <u>3</u>  |
| 294.18 | 176.0789 | 410.1372 | <u>0</u>  | <u>18</u> |
| 294.67 | 189.1103 | 423.1687 | <u>1</u>  | <u>7</u>  |
| 308.91 | 243.0709 | 477.1292 | <u>0</u>  | <u>17</u> |
| 310.15 | 221.0918 | 455.1501 | <u>7</u>  | <u>54</u> |
| 310.46 | 119.0577 | 353.1160 | <u>3</u>  | <u>36</u> |
| 311.82 | 417.1849 | 651.2433 | <u>0</u>  | <u>2</u>  |
| 312.31 | 218.0897 | 452.1480 | <u>2</u>  | <u>15</u> |
| 321.40 | 188.0789 | 422.1372 | <u>2</u>  | <u>22</u> |
| 322.70 | 128.0579 | 362.1162 | <u>1</u>  | <u>18</u> |
| 324.22 | 133.0724 | 367.1307 | <u>0</u>  | <u>40</u> |
| 326.83 | 132.0533 | 366.1116 | <u>5</u>  | <u>20</u> |
| 327.11 | 164.0676 | 398.1259 | <u>6</u>  | <u>74</u> |
| 330.48 | 75.0322  | 309.0905 | <u>1</u>  | <u>21</u> |
| 331.08 | 170.0685 | 404.1268 | <u>0</u>  | <u>17</u> |
| 333.02 | 180.0628 | 414.1211 | <u>17</u> | <u>87</u> |
| 339.55 | 188.0795 | 422.1378 | <u>2</u>  | <u>22</u> |
| 345.03 | 221.0893 | 455.1476 | <u>7</u>  | <u>53</u> |
| 345.82 | 168.0273 | 402.0856 | <u>1</u>  | <u>9</u>  |
| 351.49 | 180.0628 | 414.1211 | <u>17</u> | <u>87</u> |
| 356.78 | 129.0893 | 363.1476 | <u>0</u>  | <u>4</u>  |
| 357.94 | 328.1736 | 562.2320 | <u>0</u>  | <u>3</u>  |
| 361.48 | 161.0674 | 395.1257 | <u>1</u>  | <u>48</u> |
| 362.31 | 145.0733 | 379.1316 | <u>6</u>  | <u>54</u> |
| 367.36 | 128.1056 | 362.1639 | <u>0</u>  | <u>4</u>  |
| 367.84 | 267.0953 | 501.1536 | <u>3</u>  | <u>56</u> |

|        |          |          |          |           |
|--------|----------|----------|----------|-----------|
| 371.33 | 243.1208 | 477.1791 | <u>0</u> | <u>8</u>  |
| 374.82 | 145.0727 | 379.1310 | <u>6</u> | <u>54</u> |
| 378.90 | 174.0632 | 408.1215 | <u>2</u> | <u>22</u> |
| 381.68 | 103.0995 | 337.1578 | <u>0</u> | <u>5</u>  |
| 383.26 | 228.1101 | 462.1684 | <u>1</u> | <u>10</u> |
| 387.61 | 181.0403 | 415.0986 | <u>1</u> | <u>27</u> |
| 389.26 | 223.0298 | 457.0881 | <u>0</u> | <u>4</u>  |
| 390.71 | 277.1155 | 511.1738 | <u>2</u> | <u>26</u> |
| 392.98 | 155.0692 | 389.1275 | <u>1</u> | <u>14</u> |
| 395.10 | 202.1057 | 436.1640 | <u>0</u> | <u>10</u> |
| 402.41 | 100.0640 | 334.1223 | <u>0</u> | <u>3</u>  |
| 402.44 | 164.0675 | 398.1259 | <u>6</u> | <u>74</u> |
| 402.96 | 170.1162 | 404.1745 | <u>0</u> | <u>1</u>  |
| 403.14 | 368.1914 | 602.2497 | <u>0</u> | <u>3</u>  |
| 403.55 | 155.0688 | 389.1271 | <u>1</u> | <u>14</u> |
| 405.06 | 114.0426 | 348.1009 | <u>2</u> | <u>12</u> |
| 405.13 | 277.1145 | 511.1728 | <u>2</u> | <u>28</u> |
| 407.37 | 244.0687 | 478.1270 | <u>3</u> | <u>31</u> |
| 408.47 | 181.0733 | 415.1316 | <u>5</u> | <u>46</u> |
| 410.37 | 288.1427 | 522.2011 | <u>0</u> | <u>1</u>  |
| 410.62 | 202.0945 | 436.1528 | <u>0</u> | <u>20</u> |
| 411.80 | 147.0881 | 381.1464 | <u>0</u> | <u>40</u> |
| 416.29 | 240.0087 | 707.1180 | <u>0</u> | <u>0</u>  |
| 418.43 | 120.0050 | 354.0634 | <u>0</u> | <u>4</u>  |
| 425.29 | 147.0886 | 381.1469 | <u>0</u> | <u>40</u> |
| 432.13 | 164.0677 | 398.1260 | <u>6</u> | <u>74</u> |
| 433.13 | 184.0228 | 418.0811 | <u>0</u> | <u>3</u>  |
| 433.96 | 513.2125 | 747.2708 | <u>0</u> | <u>4</u>  |
| 434.85 | 515.2181 | 749.2764 | <u>1</u> | <u>5</u>  |
| 435.20 | 151.0712 | 385.1296 | <u>0</u> | <u>6</u>  |
| 436.16 | 167.0456 | 401.1039 | <u>2</u> | <u>11</u> |
| 438.62 | 133.0368 | 367.0951 | <u>3</u> | <u>28</u> |
| 438.98 | 222.0734 | 456.1317 | <u>1</u> | <u>53</u> |
| 439.75 | 168.0274 | 402.0857 | <u>1</u> | <u>9</u>  |
| 440.66 | 114.0788 | 348.1371 | <u>1</u> | <u>4</u>  |
| 444.17 | 202.1311 | 436.1894 | <u>0</u> | <u>14</u> |
| 444.75 | 110.0474 | 344.1057 | <u>1</u> | <u>8</u>  |
| 444.85 | 517.0723 | 751.1307 | <u>0</u> | <u>0</u>  |
| 444.96 | 246.0847 | 480.1430 | <u>2</u> | <u>31</u> |
| 450.63 | 129.1147 | 363.1730 | <u>0</u> | <u>10</u> |
| 452.84 | 162.0520 | 396.1103 | <u>5</u> | <u>81</u> |
| 453.42 | 216.1106 | 450.1689 | <u>0</u> | <u>16</u> |
| 454.72 | 128.0582 | 362.1166 | <u>1</u> | <u>18</u> |

|        |          |          |          |           |
|--------|----------|----------|----------|-----------|
| 454.87 | 164.0654 | 398.1237 | <u>6</u> | <u>77</u> |
| 457.36 | 222.0730 | 456.1313 | <u>2</u> | <u>53</u> |
| 457.99 | 75.0685  | 309.1269 | <u>2</u> | <u>13</u> |
| 458.05 | 246.1210 | 480.1793 | <u>2</u> | <u>20</u> |
| 459.44 | 89.0478  | 323.1061 | <u>4</u> | <u>38</u> |
| 460.55 | 203.0354 | 437.0938 | <u>0</u> | <u>2</u>  |
| 464.98 | 231.1209 | 465.1792 | <u>0</u> | <u>5</u>  |
| 466.01 | 162.0519 | 396.1102 | <u>5</u> | <u>81</u> |
| 470.46 | 174.0632 | 408.1215 | <u>2</u> | <u>22</u> |
| 475.37 | 222.0726 | 456.1309 | <u>2</u> | <u>53</u> |
| 478.04 | 203.0888 | 437.1471 | <u>0</u> | <u>11</u> |
| 480.61 | 83.0727  | 317.1311 | <u>0</u> | <u>2</u>  |
| 481.93 | 110.0477 | 344.1060 | <u>1</u> | <u>8</u>  |
| 484.24 | 162.0530 | 396.1114 | <u>5</u> | <u>82</u> |
| 484.80 | 124.0632 | 358.1216 | <u>1</u> | <u>10</u> |
| 486.39 | 172.0837 | 406.1420 | <u>2</u> | <u>9</u>  |
| 486.68 | 243.1036 | 477.1620 | <u>1</u> | <u>9</u>  |
| 487.23 | 69.0570  | 303.1153 | <u>0</u> | <u>2</u>  |
| 488.30 | 114.0788 | 348.1371 | <u>1</u> | <u>4</u>  |
| 489.78 | 132.0417 | 366.1000 | <u>7</u> | <u>69</u> |
| 492.51 | 181.0731 | 415.1314 | <u>5</u> | <u>46</u> |
| 494.16 | 117.0812 | 351.1395 | <u>5</u> | <u>38</u> |
| 495.94 | 168.0275 | 402.0858 | <u>1</u> | <u>9</u>  |
| 503.19 | 162.0518 | 396.1102 | <u>5</u> | <u>81</u> |
| 509.52 | 223.0066 | 457.0650 | <u>0</u> | <u>2</u>  |
| 510.77 | 252.1106 | 486.1689 | <u>0</u> | <u>11</u> |
| 515.02 | 225.1099 | 459.1683 | <u>0</u> | <u>29</u> |
| 515.71 | 162.0517 | 396.1100 | <u>5</u> | <u>81</u> |
| 523.63 | 203.0776 | 437.1359 | <u>0</u> | <u>36</u> |
| 523.92 | 45.0207  | 279.0791 | <u>1</u> | <u>8</u>  |
| 526.00 | 221.0727 | 455.1310 | <u>0</u> | <u>39</u> |
| 526.31 | 87.0689  | 321.1272 | <u>1</u> | <u>29</u> |
| 527.42 | 168.0275 | 402.0859 | <u>1</u> | <u>9</u>  |
| 527.67 | 104.0659 | 338.1242 | <u>0</u> | <u>5</u>  |
| 536.20 | 165.0430 | 399.1013 | <u>4</u> | <u>24</u> |
| 537.22 | 186.0994 | 420.1578 | <u>0</u> | <u>15</u> |
| 538.28 | 162.0517 | 396.1101 | <u>5</u> | <u>81</u> |
| 547.85 | 157.0844 | 391.1427 | <u>0</u> | <u>13</u> |
| 550.09 | 117.0780 | 351.1363 | <u>5</u> | <u>38</u> |
| 551.08 | 87.0690  | 321.1274 | <u>1</u> | <u>29</u> |
| 560.76 | 260.1370 | 494.1953 | <u>2</u> | <u>13</u> |
| 566.51 | 165.0089 | 399.0672 | <u>0</u> | <u>9</u>  |
| 568.03 | 247.0684 | 481.1267 | <u>0</u> | <u>17</u> |

|        |          |          |          |           |
|--------|----------|----------|----------|-----------|
| 570.04 | 316.1992 | 550.2575 | <u>6</u> | <u>57</u> |
| 571.45 | 73.0533  | 307.1116 | <u>3</u> | <u>18</u> |
| 575.10 | 203.0776 | 437.1359 | <u>0</u> | <u>36</u> |
| 577.06 | 87.0316  | 321.0899 | <u>1</u> | <u>18</u> |
| 577.68 | 142.0370 | 376.0953 | <u>1</u> | <u>12</u> |
| 580.36 | 117.0419 | 351.1003 | <u>3</u> | <u>35</u> |
| 584.12 | 459.1191 | 693.1774 | <u>0</u> | <u>14</u> |
| 586.39 | 105.0774 | 339.1357 | <u>1</u> | <u>15</u> |
| 586.84 | 294.1220 | 528.1803 | <u>2</u> | <u>15</u> |
| 587.05 | 145.0735 | 379.1318 | <u>6</u> | <u>54</u> |
| 587.60 | 156.0529 | 390.1112 | <u>3</u> | <u>18</u> |
| 588.52 | 240.0076 | 354.0621 | <u>0</u> | <u>6</u>  |
| 593.50 | 87.0682  | 321.1266 | <u>1</u> | <u>29</u> |
| 594.38 | 162.0518 | 396.1101 | <u>5</u> | <u>81</u> |
| 596.37 | 135.0346 | 369.0929 | <u>2</u> | <u>20</u> |
| 603.16 | 136.0375 | 370.0958 | <u>3</u> | <u>24</u> |
| 604.34 | 105.0794 | 339.1377 | <u>1</u> | <u>14</u> |
| 609.69 | 247.0673 | 481.1256 | <u>0</u> | <u>22</u> |
| 611.35 | 76.0160  | 310.0743 | <u>1</u> | <u>16</u> |
| 614.72 | 62.0363  | 296.0946 | <u>0</u> | <u>19</u> |
| 615.54 | 162.0519 | 396.1102 | <u>5</u> | <u>81</u> |
| 616.40 | 87.0679  | 321.1262 | <u>1</u> | <u>29</u> |
| 616.93 | 428.0880 | 448.1023 | <u>0</u> | <u>2</u>  |
| 617.57 | 426.0857 | 447.1012 | <u>1</u> | <u>5</u>  |
| 618.50 | 128.0939 | 362.1522 | <u>0</u> | <u>8</u>  |
| 622.64 | 147.0883 | 381.1466 | <u>0</u> | <u>40</u> |
| 624.84 | 153.0284 | 387.0867 | <u>0</u> | <u>2</u>  |
| 628.86 | 206.0414 | 440.0997 | <u>4</u> | <u>21</u> |
| 633.66 | 51.1007  | 285.1590 | <u>0</u> | <u>0</u>  |
| 639.25 | 292.1865 | 526.2448 | <u>0</u> | <u>3</u>  |
| 641.02 | 101.0474 | 335.1058 | <u>0</u> | <u>29</u> |
| 645.49 | 202.1299 | 436.1882 | <u>0</u> | <u>14</u> |
| 647.95 | 575.2579 | 809.3162 | <u>0</u> | <u>4</u>  |
| 655.43 | 438.1760 | 672.2344 | <u>0</u> | <u>5</u>  |
| 655.91 | 371.0651 | 419.5908 | <u>0</u> | <u>13</u> |
| 658.87 | 185.0340 | 419.0923 | <u>1</u> | <u>9</u>  |
| 659.09 | 369.0657 | 418.5912 | <u>0</u> | <u>8</u>  |
| 667.26 | 101.0845 | 335.1428 | <u>0</u> | <u>20</u> |
| 673.55 | 472.2629 | 470.1898 | <u>0</u> | <u>25</u> |
| 674.54 | 473.2685 | 470.6925 | <u>0</u> | <u>4</u>  |
| 675.54 | 146.0572 | 380.1155 | <u>7</u> | <u>60</u> |
| 684.51 | 176.1110 | 322.1138 | <u>0</u> | <u>0</u>  |
| 685.12 | 174.1112 | 321.1139 | <u>3</u> | <u>11</u> |

|        |          |          |          |           |
|--------|----------|----------|----------|-----------|
| 685.55 | 175.1137 | 642.2230 | <u>1</u> | <u>3</u>  |
| 689.65 | 131.0571 | 365.1155 | <u>8</u> | <u>60</u> |
| 690.94 | 101.0847 | 335.1430 | <u>0</u> | <u>20</u> |
| 691.16 | 177.0338 | 411.0921 | <u>0</u> | <u>0</u>  |
| 694.85 | 196.0363 | 430.0946 | <u>0</u> | <u>37</u> |
| 698.99 | 89.0781  | 323.1364 | <u>0</u> | <u>0</u>  |
| 700.67 | 154.0505 | 311.0836 | <u>0</u> | <u>14</u> |
| 701.51 | 153.0404 | 387.0987 | <u>2</u> | <u>20</u> |
| 701.95 | 117.0734 | 351.1317 | <u>0</u> | <u>0</u>  |
| 702.84 | 146.0591 | 380.1174 | <u>7</u> | <u>60</u> |
| 706.05 | 275.1460 | 371.6313 | <u>2</u> | <u>10</u> |
| 706.09 | 166.0470 | 400.1053 | <u>5</u> | <u>35</u> |
| 711.16 | 154.0992 | 388.1575 | <u>0</u> | <u>5</u>  |
| 711.35 | 43.0421  | 277.1004 | <u>0</u> | <u>4</u>  |
| 711.70 | 115.0262 | 349.0845 | <u>0</u> | <u>13</u> |
| 712.34 | 166.0254 | 400.0838 | <u>3</u> | <u>22</u> |
| 713.11 | 144.0077 | 378.0660 | <u>0</u> | <u>7</u>  |
| 714.82 | 90.0311  | 324.0894 | <u>5</u> | <u>41</u> |
| 716.10 | 146.0567 | 380.1150 | <u>7</u> | <u>60</u> |
| 717.32 | 101.0842 | 335.1425 | <u>0</u> | <u>20</u> |
| 720.69 | 103.0265 | 337.0848 | <u>2</u> | <u>15</u> |
| 720.92 | 166.0483 | 400.1066 | <u>5</u> | <u>36</u> |
| 723.20 | 106.0097 | 340.0680 | <u>0</u> | <u>10</u> |
| 726.11 | 163.0660 | 397.1243 | <u>3</u> | <u>36</u> |
| 729.11 | 261.1324 | 364.6245 | <u>3</u> | <u>3</u>  |
| 731.51 | 101.0833 | 335.1416 | <u>0</u> | <u>20</u> |
| 734.14 | 274.1645 | 371.1406 | <u>0</u> | <u>4</u>  |
| 736.00 | 144.0427 | 378.1010 | <u>3</u> | <u>44</u> |
| 739.27 | 72.0569  | 306.1152 | <u>3</u> | <u>22</u> |
| 741.11 | 188.1261 | 328.1214 | <u>1</u> | <u>7</u>  |
| 742.34 | 214.1318 | 448.1901 | <u>1</u> | <u>7</u>  |
| 748.07 | 271.1633 | 369.6400 | <u>0</u> | <u>1</u>  |
| 753.28 | 101.0837 | 335.1420 | <u>0</u> | <u>20</u> |
| 754.11 | 356.2273 | 590.2856 | <u>0</u> | <u>0</u>  |
| 755.65 | 102.0315 | 336.0899 | <u>6</u> | <u>52</u> |
| 758.63 | 325.1865 | 559.2448 | <u>0</u> | <u>0</u>  |
| 759.50 | 430.2390 | 664.2974 | <u>0</u> | <u>2</u>  |
| 760.48 | 261.1326 | 364.6246 | <u>3</u> | <u>3</u>  |
| 762.60 | 130.0249 | 364.0832 | <u>4</u> | <u>40</u> |
| 763.39 | 133.0186 | 367.0769 | <u>0</u> | <u>4</u>  |
| 768.50 | 273.1796 | 370.6481 | <u>0</u> | <u>0</u>  |
| 768.70 | 101.0849 | 335.1432 | <u>0</u> | <u>20</u> |
| 772.12 | 129.0777 | 363.1360 | <u>4</u> | <u>30</u> |

|        |          |          |          |           |
|--------|----------|----------|----------|-----------|
| 772.47 | 156.0522 | 390.1106 | <u>3</u> | <u>18</u> |
| 773.17 | 149.0239 | 383.0822 | <u>0</u> | <u>1</u>  |
| 773.77 | 297.0434 | 382.5800 | <u>1</u> | <u>5</u>  |
| 774.10 | 297.0439 | 531.1023 | <u>1</u> | <u>5</u>  |
| 774.33 | 299.0419 | 383.5793 | <u>0</u> | <u>17</u> |
| 777.36 | 275.1477 | 371.6322 | <u>2</u> | <u>13</u> |
| 778.20 | 276.1505 | 372.1336 | <u>0</u> | <u>5</u>  |
| 783.06 | 129.0779 | 363.1362 | <u>4</u> | <u>30</u> |
| 783.54 | 101.0837 | 335.1420 | <u>0</u> | <u>20</u> |
| 785.41 | 242.1499 | 476.2082 | <u>0</u> | <u>5</u>  |
| 791.89 | 63.0085  | 297.0668 | <u>0</u> | <u>1</u>  |
| 792.66 | 295.0305 | 381.5736 | <u>0</u> | <u>1</u>  |
| 794.40 | 125.0170 | 296.5668 | <u>1</u> | <u>5</u>  |
| 795.27 | 127.0156 | 297.5661 | <u>0</u> | <u>1</u>  |
| 810.11 | 486.1741 | 720.2324 | <u>0</u> | <u>17</u> |
| 810.21 | 101.0845 | 335.1428 | <u>0</u> | <u>20</u> |
| 814.33 | 223.0062 | 457.0646 | <u>0</u> | <u>2</u>  |
| 815.98 | 208.0510 | 338.0838 | <u>0</u> | <u>12</u> |
| 816.56 | 187.0833 | 421.1416 | <u>1</u> | <u>32</u> |
| 817.18 | 85.0521  | 319.1104 | <u>1</u> | <u>16</u> |
| 819.30 | 145.0726 | 379.1310 | <u>6</u> | <u>54</u> |
| 820.74 | 121.0307 | 355.0891 | <u>0</u> | <u>2</u>  |
| 824.05 | 151.0601 | 385.1184 | <u>3</u> | <u>35</u> |
| 824.69 | 117.0417 | 351.1000 | <u>3</u> | <u>35</u> |
| 831.85 | 101.0848 | 335.1432 | <u>0</u> | <u>20</u> |
| 833.51 | 187.0947 | 327.6057 | <u>0</u> | <u>7</u>  |
| 836.34 | 322.1279 | 395.1223 | <u>0</u> | <u>8</u>  |
| 842.54 | 356.0618 | 590.1201 | <u>0</u> | <u>8</u>  |
| 848.66 | 446.0119 | 457.0643 | <u>0</u> | <u>4</u>  |
| 850.19 | 144.0533 | 306.0850 | <u>3</u> | <u>15</u> |
| 852.03 | 163.1034 | 315.6100 | <u>0</u> | <u>16</u> |
| 852.22 | 144.0587 | 306.0877 | <u>3</u> | <u>0</u>  |
| 854.60 | 144.0419 | 378.1002 | <u>3</u> | <u>44</u> |
| 855.00 | 153.0419 | 387.1002 | <u>2</u> | <u>24</u> |
| 855.51 | 137.0469 | 371.1052 | <u>5</u> | <u>20</u> |
| 859.78 | 203.0784 | 437.1367 | <u>0</u> | <u>36</u> |
| 860.83 | 43.0414  | 277.0997 | <u>0</u> | <u>4</u>  |
| 863.82 | 155.0514 | 622.1607 | <u>0</u> | <u>1</u>  |
| 863.85 | 153.0398 | 387.0981 | <u>2</u> | <u>20</u> |
| 864.08 | 154.0499 | 311.0833 | <u>0</u> | <u>14</u> |
| 865.75 | 154.0491 | 621.1585 | <u>0</u> | <u>14</u> |
| 865.84 | 115.0995 | 349.1579 | <u>0</u> | <u>21</u> |
| 866.47 | 349.1993 | 583.2577 | <u>0</u> | <u>0</u>  |

|        |          |          |           |           |
|--------|----------|----------|-----------|-----------|
| 867.68 | 242.0210 | 355.0688 | <u>1</u>  | <u>35</u> |
| 868.45 | 240.0239 | 474.0822 | <u>1</u>  | <u>3</u>  |
| 869.23 | 132.0528 | 300.0847 | <u>5</u>  | <u>20</u> |
| 876.51 | 200.1156 | 434.1739 | <u>0</u>  | <u>11</u> |
| 881.61 | 147.0339 | 381.0922 | <u>1</u>  | <u>8</u>  |
| 882.08 | 71.0362  | 305.0945 | <u>1</u>  | <u>9</u>  |
| 896.10 | 34.0046  | 501.1140 | <u>1</u>  | <u>8</u>  |
| 896.12 | 146.0671 | 307.0919 | <u>4</u>  | <u>29</u> |
| 896.65 | 144.0408 | 378.0992 | <u>3</u>  | <u>43</u> |
| 898.05 | 148.0691 | 308.0929 | <u>2</u>  | <u>45</u> |
| 898.18 | 133.1091 | 367.1674 | <u>0</u>  | <u>9</u>  |
| 901.08 | 114.1017 | 581.2110 | <u>3</u>  | <u>12</u> |
| 903.27 | 198.0518 | 432.1101 | <u>3</u>  | <u>20</u> |
| 905.90 | 112.0967 | 579.2060 | <u>0</u>  | <u>0</u>  |
| 906.00 | 88.0167  | 322.0750 | <u>2</u>  | <u>30</u> |
| 907.55 | 115.0996 | 349.1579 | <u>0</u>  | <u>21</u> |
| 909.44 | 168.0409 | 402.0992 | <u>7</u>  | <u>25</u> |
| 909.94 | 180.0588 | 324.0877 | <u>14</u> | <u>90</u> |
| 928.93 | 133.1092 | 367.1675 | <u>0</u>  | <u>9</u>  |
| 933.08 | 115.0991 | 349.1574 | <u>0</u>  | <u>21</u> |
| 934.75 | 256.0378 | 362.0772 | <u>0</u>  | <u>11</u> |
| 935.66 | 254.0406 | 361.0786 | <u>0</u>  | <u>9</u>  |
| 936.91 | 202.1054 | 335.1110 | <u>0</u>  | <u>5</u>  |
| 942.24 | 204.1112 | 336.1139 | <u>0</u>  | <u>12</u> |
| 945.76 | 126.0314 | 360.0897 | <u>0</u>  | <u>15</u> |
| 951.10 | 155.0677 | 389.1260 | <u>1</u>  | <u>14</u> |
| 951.19 | 115.0983 | 349.1566 | <u>0</u>  | <u>21</u> |
| 952.86 | 159.0886 | 393.1469 | <u>6</u>  | <u>43</u> |
| 953.11 | 190.1306 | 329.1236 | <u>0</u>  | <u>8</u>  |
| 954.57 | 240.0076 | 474.0659 | <u>0</u>  | <u>6</u>  |
| 961.81 | 115.0995 | 349.1579 | <u>0</u>  | <u>21</u> |
| 962.48 | 104.0829 | 338.1413 | <u>0</u>  | <u>11</u> |
| 963.03 | 135.0434 | 369.1017 | <u>0</u>  | <u>0</u>  |
| 963.30 | 180.0657 | 324.0912 | <u>17</u> | <u>88</u> |
| 968.23 | 100.0169 | 334.0753 | <u>0</u>  | <u>16</u> |
| 970.81 | 144.0411 | 378.0994 | <u>3</u>  | <u>43</u> |
| 977.73 | 351.1571 | 585.2154 | <u>0</u>  | <u>16</u> |
| 977.87 | 583.2814 | 817.3397 | <u>0</u>  | <u>6</u>  |
| 980.29 | 159.0881 | 393.1464 | <u>6</u>  | <u>43</u> |
| 985.11 | 129.0773 | 363.1356 | <u>4</u>  | <u>30</u> |
| 993.27 | 32.0282  | 266.0865 | <u>1</u>  | <u>37</u> |
| 994.36 | 446.2273 | 680.2856 | <u>0</u>  | <u>6</u>  |
| 999.45 | 133.0935 | 600.2028 | <u>0</u>  | <u>6</u>  |



|         |          |          |           |           |
|---------|----------|----------|-----------|-----------|
| 1001.55 | 134.0902 | 301.1034 | <u>0</u>  | <u>11</u> |
| 1002.80 | 493.1550 | 727.2133 | <u>0</u>  | <u>12</u> |
| 1002.99 | 246.0994 | 480.1578 | <u>0</u>  | <u>12</u> |
| 1004.67 | 132.0906 | 366.1490 | <u>2</u>  | <u>19</u> |
| 1011.83 | 436.1623 | 670.2206 | <u>0</u>  | <u>12</u> |
| 1014.22 | 161.0495 | 395.1078 | <u>3</u>  | <u>19</u> |
| 1015.78 | 188.0297 | 422.0880 | <u>1</u>  | <u>18</u> |
| 1015.88 | 221.0881 | 688.1975 | <u>7</u>  | <u>56</u> |
| 1018.88 | 112.0515 | 346.1098 | <u>1</u>  | <u>16</u> |
| 1020.68 | 120.0572 | 354.1155 | <u>2</u>  | <u>18</u> |
| 1020.70 | 180.0624 | 324.0895 | <u>17</u> | <u>87</u> |
| 1022.18 | 191.0565 | 425.1148 | <u>1</u>  | <u>19</u> |
| 1022.22 | 182.0641 | 325.0904 | <u>0</u>  | <u>1</u>  |
| 1022.29 | 162.0519 | 396.1102 | <u>5</u>  | <u>81</u> |
| 1027.21 | 145.0723 | 379.1306 | <u>6</u>  | <u>54</u> |
| 1027.82 | 363.1691 | 597.2274 | <u>0</u>  | <u>7</u>  |
| 1028.02 | 57.0205  | 291.0788 | <u>0</u>  | <u>5</u>  |
| 1028.87 | 574.2754 | 808.3337 | <u>0</u>  | <u>1</u>  |
| 1030.25 | 243.1578 | 355.6372 | <u>0</u>  | <u>3</u>  |
| 1050.90 | 188.0302 | 422.0886 | <u>1</u>  | <u>18</u> |
| 1051.52 | 230.1466 | 349.1316 | <u>0</u>  | <u>6</u>  |
| 1054.65 | 71.0725  | 305.1308 | <u>0</u>  | <u>6</u>  |
| 1054.65 | 132.0533 | 366.1116 | <u>5</u>  | <u>20</u> |
| 1054.97 | 243.1210 | 355.6188 | <u>0</u>  | <u>8</u>  |
| 1056.90 | 189.0402 | 423.0985 | <u>1</u>  | <u>10</u> |
| 1058.28 | 144.0407 | 378.0990 | <u>3</u>  | <u>43</u> |
| 1064.67 | 182.0632 | 325.0899 | <u>0</u>  | <u>3</u>  |
| 1064.96 | 180.0617 | 324.0892 | <u>17</u> | <u>94</u> |
| 1065.33 | 162.0524 | 396.1107 | <u>5</u>  | <u>81</u> |
| 1065.97 | 138.0305 | 372.0888 | <u>4</u>  | <u>21</u> |
| 1066.60 | 181.0667 | 324.5917 | <u>0</u>  | <u>0</u>  |
| 1067.09 | 147.1081 | 614.2175 | <u>0</u>  | <u>3</u>  |
| 1068.09 | 131.0728 | 365.1311 | <u>2</u>  | <u>10</u> |
| 1070.18 | 260.1147 | 494.1730 | <u>0</u>  | <u>13</u> |
| 1072.35 | 148.1052 | 308.1109 | <u>0</u>  | <u>2</u>  |
| 1079.43 | 173.1035 | 407.1618 | <u>4</u>  | <u>29</u> |
| 1081.75 | 147.1122 | 307.6144 | <u>0</u>  | <u>1</u>  |
| 1092.79 | 187.1666 | 327.6416 | <u>2</u>  | <u>3</u>  |
| 1093.74 | 243.1563 | 355.6365 | <u>0</u>  | <u>2</u>  |
| 1095.07 | 207.0888 | 441.1471 | <u>3</u>  | <u>34</u> |
| 1102.21 | 96.2056  | 563.3149 | <u>0</u>  | <u>0</u>  |
| 1102.25 | 155.0673 | 622.1767 | <u>1</u>  | <u>14</u> |
| 1103.18 | 157.0685 | 624.1779 | <u>0</u>  | <u>0</u>  |

|         |          |          |           |           |
|---------|----------|----------|-----------|-----------|
| 1103.45 | 193.0721 | 427.1304 | <u>3</u>  | <u>28</u> |
| 1105.70 | 157.0684 | 312.5925 | <u>0</u>  | <u>0</u>  |
| 1106.06 | 268.0155 | 368.0661 | <u>0</u>  | <u>2</u>  |
| 1106.51 | 270.0152 | 369.0659 | <u>1</u>  | <u>4</u>  |
| 1106.58 | 156.0681 | 312.0924 | <u>1</u>  | <u>3</u>  |
| 1107.17 | 155.0698 | 311.5932 | <u>1</u>  | <u>14</u> |
| 1107.32 | 27.0111  | 261.0694 | <u>0</u>  | <u>0</u>  |
| 1107.77 | 156.0709 | 623.1802 | <u>1</u>  | <u>0</u>  |
| 1112.05 | 48.0034  | 282.0617 | <u>1</u>  | <u>4</u>  |
| 1114.56 | 93.0323  | 327.0906 | <u>0</u>  | <u>0</u>  |
| 1114.72 | 180.0674 | 324.0920 | <u>17</u> | <u>88</u> |
| 1115.70 | 173.1032 | 407.1615 | <u>4</u>  | <u>29</u> |
| 1122.10 | 90.0479  | 324.1063 | <u>0</u>  | <u>6</u>  |
| 1124.10 | 102.0814 | 285.0990 | <u>0</u>  | <u>10</u> |
| 1124.93 | 310.1231 | 389.1199 | <u>1</u>  | <u>20</u> |
| 1127.36 | 173.1034 | 407.1617 | <u>4</u>  | <u>29</u> |
| 1128.86 | 120.0038 | 354.0621 | <u>0</u>  | <u>4</u>  |
| 1132.02 | 111.0796 | 345.1379 | <u>1</u>  | <u>4</u>  |
| 1132.30 | 42.0220  | 276.0803 | <u>0</u>  | <u>3</u>  |
| 1133.28 | 128.1045 | 298.1106 | <u>0</u>  | <u>4</u>  |
| 1134.28 | 128.1055 | 595.2148 | <u>0</u>  | <u>4</u>  |
| 1135.23 | 280.1194 | 514.1778 | <u>0</u>  | <u>19</u> |
| 1137.40 | 175.0658 | 409.1241 | <u>2</u>  | <u>20</u> |
| 1140.13 | 438.0025 | 672.0609 | <u>0</u>  | <u>0</u>  |
| 1142.61 | 240.0089 | 354.0628 | <u>0</u>  | <u>0</u>  |
| 1143.04 | 310.1324 | 544.1908 | <u>0</u>  | <u>5</u>  |
| 1143.21 | 227.0589 | 347.5878 | <u>0</u>  | <u>17</u> |
| 1143.40 | 226.0577 | 347.0872 | <u>1</u>  | <u>26</u> |
| 1145.35 | 136.0379 | 370.0962 | <u>3</u>  | <u>24</u> |
| 1145.93 | 159.0881 | 393.1464 | <u>6</u>  | <u>43</u> |
| 1148.92 | 175.0648 | 409.1231 | <u>2</u>  | <u>19</u> |
| 1156.35 | 240.0070 | 354.0618 | <u>0</u>  | <u>6</u>  |
| 1161.00 | 32.0242  | 266.0826 | <u>1</u>  | <u>37</u> |
| 1167.58 | 324.0440 | 396.0803 | <u>0</u>  | <u>12</u> |
| 1169.51 | 73.0882  | 307.1465 | <u>0</u>  | <u>8</u>  |
| 1171.79 | 175.0620 | 409.1203 | <u>3</u>  | <u>22</u> |
| 1177.41 | 221.1050 | 455.1633 | <u>0</u>  | <u>24</u> |
| 1182.06 | 245.0697 | 356.5932 | <u>0</u>  | <u>14</u> |
| 1182.59 | 244.0668 | 356.0917 | <u>2</u>  | <u>33</u> |
| 1186.17 | 160.1213 | 314.1190 | <u>2</u>  | <u>12</u> |
| 1195.62 | 276.1466 | 510.2050 | <u>0</u>  | <u>8</u>  |
| 1197.14 | 136.0519 | 370.1102 | <u>1</u>  | <u>43</u> |
| 1201.39 | 164.0685 | 316.0926 | <u>6</u>  | <u>74</u> |

|         |          |          |          |           |
|---------|----------|----------|----------|-----------|
| 1205.77 | 129.0620 | 596.1713 | <u>1</u> | <u>3</u>  |
| 1209.66 | 424.2327 | 658.2910 | <u>0</u> | <u>13</u> |
| 1210.58 | 166.0032 | 317.0599 | <u>0</u> | <u>5</u>  |
| 1212.32 | 187.1190 | 421.1773 | <u>0</u> | <u>22</u> |
| 1212.61 | 128.0576 | 298.0871 | <u>1</u> | <u>18</u> |
| 1212.96 | 130.0575 | 299.0871 | <u>0</u> | <u>1</u>  |
| 1213.16 | 202.0941 | 335.1054 | <u>0</u> | <u>19</u> |
| 1213.61 | 128.0571 | 362.1154 | <u>1</u> | <u>16</u> |
| 1218.48 | 174.1034 | 321.1100 | <u>1</u> | <u>35</u> |
| 1219.04 | 246.1361 | 480.1944 | <u>0</u> | <u>12</u> |
| 1219.73 | 112.0150 | 346.0734 | <u>2</u> | <u>9</u>  |
| 1220.00 | 126.0317 | 360.0900 | <u>0</u> | <u>15</u> |
| 1220.05 | 174.0977 | 321.1072 | <u>1</u> | <u>35</u> |
| 1223.28 | 121.0180 | 294.5673 | <u>2</u> | <u>15</u> |
| 1223.62 | 187.1190 | 421.1773 | <u>0</u> | <u>22</u> |
| 1223.88 | 246.1466 | 480.2049 | <u>1</u> | <u>7</u>  |
| 1224.34 | 61.0110  | 295.0693 | <u>0</u> | <u>1</u>  |
| 1225.99 | 180.0781 | 414.1364 | <u>1</u> | <u>31</u> |
| 1233.86 | 102.0798 | 285.0982 | <u>0</u> | <u>10</u> |
| 1237.44 | 246.1456 | 480.2040 | <u>1</u> | <u>7</u>  |
| 1248.42 | 99.1044  | 333.1627 | <u>0</u> | <u>1</u>  |
| 1249.09 | 305.2608 | 539.3191 | <u>0</u> | <u>0</u>  |
| 1249.72 | 310.1296 | 544.1879 | <u>0</u> | <u>14</u> |
| 1250.04 | 160.0862 | 314.1014 | <u>1</u> | <u>37</u> |
| 1250.68 | 162.0837 | 315.1002 | <u>1</u> | <u>6</u>  |
| 1251.90 | 77.0313  | 272.5740 | <u>1</u> | <u>5</u>  |
| 1253.75 | 75.0304  | 271.5735 | <u>1</u> | <u>22</u> |
| 1255.66 | 144.0871 | 306.1019 | <u>0</u> | <u>17</u> |
| 1255.84 | 144.0925 | 306.1046 | <u>0</u> | <u>17</u> |
| 1259.16 | 161.1239 | 628.2332 | <u>0</u> | <u>0</u>  |
| 1260.09 | 160.1193 | 314.1180 | <u>2</u> | <u>12</u> |
| 1260.53 | 162.1193 | 315.1180 | <u>2</u> | <u>7</u>  |
| 1260.67 | 282.1382 | 516.1965 | <u>0</u> | <u>1</u>  |
| 1262.70 | 190.1205 | 329.1186 | <u>0</u> | <u>3</u>  |
| 1264.17 | 188.1190 | 328.1178 | <u>3</u> | <u>25</u> |
| 1264.69 | 188.1126 | 328.1146 | <u>3</u> | <u>24</u> |
| 1267.40 | 136.0507 | 370.1090 | <u>1</u> | <u>43</u> |
| 1270.00 | 131.0615 | 299.5891 | <u>8</u> | <u>60</u> |
| 1270.58 | 131.0563 | 299.5865 | <u>8</u> | <u>60</u> |
| 1270.59 | 90.0138  | 324.0721 | <u>0</u> | <u>2</u>  |
| 1272.61 | 157.0840 | 312.6003 | <u>0</u> | <u>12</u> |
| 1273.47 | 167.0695 | 317.5931 | <u>0</u> | <u>20</u> |
| 1274.85 | 868.0080 | 668.0623 | <u>0</u> | <u>0</u>  |

|         |          |          |          |           |
|---------|----------|----------|----------|-----------|
| 1275.69 | 162.0538 | 315.0852 | <u>5</u> | <u>82</u> |
| 1280.79 | 167.0675 | 401.1259 | <u>0</u> | <u>20</u> |
| 1283.33 | 85.0888  | 319.1471 | <u>0</u> | <u>5</u>  |
| 1284.91 | 175.1046 | 642.2139 | <u>0</u> | <u>7</u>  |
| 1285.81 | 174.0995 | 321.1081 | <u>1</u> | <u>35</u> |
| 1286.03 | 176.0997 | 322.1082 | <u>2</u> | <u>20</u> |
| 1289.61 | 362.2099 | 596.2682 | <u>3</u> | <u>44</u> |
| 1291.02 | 83.0737  | 317.1320 | <u>0</u> | <u>2</u>  |
| 1298.89 | 188.1253 | 328.1210 | <u>1</u> | <u>7</u>  |
| 1300.23 | 188.1168 | 328.1167 | <u>3</u> | <u>25</u> |
| 1301.21 | 61.0512  | 264.5839 | <u>1</u> | <u>15</u> |
| 1301.83 | 189.1170 | 328.6168 | <u>0</u> | <u>1</u>  |
| 1304.77 | 152.0456 | 386.1039 | <u>9</u> | <u>32</u> |
| 1305.94 | 115.0984 | 349.1567 | <u>0</u> | <u>21</u> |
| 1306.02 | 241.0087 | 354.5627 | <u>1</u> | <u>7</u>  |
| 1308.08 | 116.0960 | 292.1063 | <u>1</u> | <u>9</u>  |
| 1308.21 | 162.0553 | 315.0860 | <u>5</u> | <u>82</u> |
| 1308.47 | 118.0931 | 293.1049 | <u>0</u> | <u>0</u>  |
| 1309.03 | 240.0062 | 354.0614 | <u>0</u> | <u>7</u>  |
| 1312.80 | 168.0282 | 318.0724 | <u>1</u> | <u>9</u>  |
| 1314.96 | 216.1115 | 342.1141 | <u>0</u> | <u>16</u> |
| 1315.01 | 83.0724  | 317.1307 | <u>0</u> | <u>2</u>  |
| 1320.35 | 164.0681 | 316.0924 | <u>6</u> | <u>74</u> |
| 1320.46 | 114.0780 | 291.0973 | <u>1</u> | <u>4</u>  |
| 1320.66 | 116.0798 | 292.0982 | <u>2</u> | <u>45</u> |
| 1325.65 | 120.0055 | 354.0639 | <u>0</u> | <u>4</u>  |
| 1327.94 | 169.0315 | 636.1408 | <u>0</u> | <u>2</u>  |
| 1329.70 | 117.0999 | 292.6083 | <u>0</u> | <u>1</u>  |
| 1329.76 | 168.0274 | 318.0720 | <u>1</u> | <u>9</u>  |
| 1330.10 | 170.0265 | 319.0716 | <u>1</u> | <u>11</u> |
| 1330.29 | 105.0782 | 286.5974 | <u>1</u> | <u>15</u> |
| 1331.79 | 170.0140 | 404.0723 | <u>1</u> | <u>3</u>  |
| 1332.41 | 106.0446 | 340.1030 | <u>1</u> | <u>13</u> |
| 1332.48 | 208.0885 | 338.1026 | <u>3</u> | <u>32</u> |
| 1332.83 | 117.0977 | 584.2070 | <u>0</u> | <u>0</u>  |
| 1333.81 | 204.1353 | 336.1260 | <u>0</u> | <u>4</u>  |
| 1334.49 | 202.1332 | 335.1249 | <u>0</u> | <u>14</u> |
| 1335.45 | 118.0932 | 293.1049 | <u>0</u> | <u>0</u>  |
| 1335.59 | 98.0836  | 565.1930 | <u>0</u> | <u>1</u>  |
| 1335.96 | 116.0933 | 292.1050 | <u>1</u> | <u>9</u>  |
| 1336.69 | 212.0873 | 679.1967 | <u>0</u> | <u>16</u> |
| 1338.95 | 118.0978 | 293.1072 | <u>0</u> | <u>10</u> |
| 1344.00 | 183.0626 | 650.1719 | <u>0</u> | <u>15</u> |

|         |          |          |          |           |
|---------|----------|----------|----------|-----------|
| 1344.25 | 183.0627 | 417.1210 | <u>0</u> | <u>15</u> |
| 1345.10 | 69.0571  | 303.1154 | <u>0</u> | <u>2</u>  |
| 1345.79 | 86.0834  | 277.1000 | <u>0</u> | <u>1</u>  |
| 1347.22 | 99.0445  | 283.5806 | <u>0</u> | <u>4</u>  |
| 1353.78 | 90.0133  | 324.0717 | <u>0</u> | <u>2</u>  |
| 1357.98 | 119.0355 | 353.0938 | <u>0</u> | <u>8</u>  |
| 1364.40 | 154.0511 | 311.0838 | <u>0</u> | <u>14</u> |
| 1367.09 | 104.0297 | 338.0880 | <u>0</u> | <u>7</u>  |
| 1367.93 | 162.0509 | 315.0838 | <u>5</u> | <u>84</u> |
| 1370.03 | 274.1764 | 508.2347 | <u>1</u> | <u>2</u>  |
| 1377.60 | 169.0301 | 636.1394 | <u>0</u> | <u>3</u>  |
| 1378.07 | 182.0769 | 649.1862 | <u>4</u> | <u>40</u> |
| 1380.74 | 247.0671 | 357.5918 | <u>0</u> | <u>21</u> |
| 1381.28 | 167.0211 | 401.0794 | <u>2</u> | <u>13</u> |
| 1382.02 | 183.0761 | 325.5964 | <u>1</u> | <u>12</u> |
| 1382.10 | 168.0279 | 318.0723 | <u>1</u> | <u>9</u>  |
| 1382.43 | 170.0304 | 319.0735 | <u>0</u> | <u>13</u> |
| 1383.66 | 126.0551 | 297.0859 | <u>2</u> | <u>3</u>  |
| 1384.49 | 92.0467  | 280.0817 | <u>1</u> | <u>25</u> |
| 1385.31 | 82.0383  | 275.0775 | <u>0</u> | <u>8</u>  |
| 1385.53 | 80.0375  | 547.1468 | <u>1</u> | <u>0</u>  |
| 1386.46 | 80.0375  | 274.0771 | <u>1</u> | <u>0</u>  |
| 1386.56 | 162.0508 | 315.0837 | <u>5</u> | <u>84</u> |
| 1387.25 | 114.0799 | 291.0983 | <u>1</u> | <u>4</u>  |
| 1388.30 | 116.0788 | 292.0977 | <u>2</u> | <u>45</u> |
| 1389.94 | 245.1037 | 479.1620 | <u>0</u> | <u>20</u> |
| 1391.07 | 126.0222 | 360.0806 | <u>0</u> | <u>1</u>  |
| 1392.64 | 211.1339 | 339.6253 | <u>0</u> | <u>1</u>  |
| 1396.01 | 222.0115 | 345.0641 | <u>0</u> | <u>3</u>  |
| 1396.23 | 159.0670 | 393.1253 | <u>1</u> | <u>16</u> |
| 1401.26 | 163.0567 | 630.1660 | <u>0</u> | <u>0</u>  |
| 1401.49 | 145.0514 | 379.1097 | <u>0</u> | <u>12</u> |
| 1402.23 | 527.1872 | 994.2966 | <u>0</u> | <u>9</u>  |
| 1403.52 | 144.0424 | 378.1007 | <u>3</u> | <u>44</u> |
| 1404.11 | 162.0519 | 315.0843 | <u>5</u> | <u>81</u> |
| 1404.18 | 164.0516 | 316.0841 | <u>5</u> | <u>39</u> |
| 1404.51 | 195.0051 | 331.5609 | <u>0</u> | <u>4</u>  |
| 1404.94 | 197.0031 | 332.5598 | <u>0</u> | <u>6</u>  |
| 1407.90 | 72.0580  | 306.1164 | <u>3</u> | <u>22</u> |
| 1410.45 | 159.0669 | 393.1252 | <u>1</u> | <u>16</u> |
| 1412.01 | 163.0563 | 315.5865 | <u>0</u> | <u>0</u>  |
| 1424.01 | 188.0197 | 328.0682 | <u>0</u> | <u>4</u>  |
| 1425.02 | 188.0259 | 328.0712 | <u>0</u> | <u>7</u>  |

|         |          |          |          |           |
|---------|----------|----------|----------|-----------|
| 1430.86 | 83.0749  | 317.1332 | <u>0</u> | <u>2</u>  |
| 1435.96 | 129.1156 | 363.1739 | <u>0</u> | <u>10</u> |
| 1438.02 | 101.1039 | 568.2132 | <u>0</u> | <u>0</u>  |
| 1440.60 | 138.0580 | 605.1674 | <u>1</u> | <u>4</u>  |
| 1441.82 | 83.0742  | 317.1325 | <u>0</u> | <u>2</u>  |
| 1441.92 | 100.0988 | 284.1077 | <u>0</u> | <u>2</u>  |
| 1442.39 | 102.0989 | 285.1078 | <u>0</u> | <u>0</u>  |
| 1442.74 | 329.0411 | 398.5789 | <u>0</u> | <u>10</u> |
| 1443.52 | 123.0864 | 590.1957 | <u>0</u> | <u>3</u>  |
| 1443.66 | 158.1520 | 625.2613 | <u>0</u> | <u>4</u>  |
| 1445.30 | 195.0016 | 331.5591 | <u>0</u> | <u>4</u>  |
| 1445.36 | 197.0001 | 332.5584 | <u>1</u> | <u>7</u>  |
| 1446.02 | 56.0503  | 290.1086 | <u>0</u> | <u>0</u>  |
| 1447.02 | 100.1006 | 567.2100 | <u>0</u> | <u>2</u>  |
| 1453.90 | 152.0336 | 310.0751 | <u>3</u> | <u>13</u> |
| 1454.65 | 128.0925 | 298.1046 | <u>0</u> | <u>8</u>  |
| 1455.21 | 151.0077 | 385.0660 | <u>0</u> | <u>7</u>  |
| 1457.92 | 264.1346 | 498.1929 | <u>0</u> | <u>17</u> |
| 1462.64 | 136.0538 | 302.0852 | <u>1</u> | <u>41</u> |
| 1463.03 | 216.1461 | 342.1314 | <u>0</u> | <u>15</u> |
| 1466.84 | 82.0526  | 275.0846 | <u>0</u> | <u>4</u>  |
| 1470.08 | 223.1311 | 345.6239 | <u>0</u> | <u>2</u>  |
| 1481.38 | 136.0515 | 302.0841 | <u>1</u> | <u>43</u> |
| 1482.51 | 130.0260 | 299.0713 | <u>4</u> | <u>40</u> |
| 1489.56 | 138.0401 | 303.0784 | <u>2</u> | <u>17</u> |
| 1489.95 | 136.0393 | 302.0780 | <u>3</u> | <u>24</u> |
| 1491.04 | 136.0391 | 370.0974 | <u>3</u> | <u>24</u> |
| 1495.16 | 209.0675 | 338.5921 | <u>1</u> | <u>49</u> |
| 1501.25 | 151.0080 | 385.0663 | <u>0</u> | <u>7</u>  |
| 1501.85 | 177.0974 | 644.2068 | <u>0</u> | <u>22</u> |
| 1502.67 | 178.0962 | 323.1064 | <u>1</u> | <u>24</u> |
| 1505.42 | 120.0567 | 354.1150 | <u>2</u> | <u>18</u> |
| 1505.90 | 56.0946  | 290.1530 | <u>0</u> | <u>0</u>  |
| 1506.97 | 136.0506 | 302.0836 | <u>1</u> | <u>43</u> |
| 1507.38 | 116.0141 | 292.0654 | <u>2</u> | <u>18</u> |
| 1507.79 | 101.0851 | 284.6009 | <u>0</u> | <u>20</u> |
| 1508.25 | 118.0106 | 293.0636 | <u>0</u> | <u>5</u>  |
| 1523.17 | 138.0400 | 303.0783 | <u>2</u> | <u>18</u> |
| 1524.30 | 136.0392 | 302.0779 | <u>3</u> | <u>24</u> |
| 1524.43 | 182.0590 | 325.0878 | <u>6</u> | <u>48</u> |
| 1529.23 | 237.0969 | 352.6068 | <u>0</u> | <u>13</u> |
| 1541.49 | 120.0331 | 354.0915 | <u>0</u> | <u>4</u>  |
| 1543.35 | 110.0462 | 577.1556 | <u>1</u> | <u>8</u>  |

|         |          |          |          |           |
|---------|----------|----------|----------|-----------|
| 1543.49 | 110.0484 | 344.1068 | <u>1</u> | <u>8</u>  |
| 1547.56 | 127.0608 | 297.5887 | <u>2</u> | <u>20</u> |
| 1549.56 | 159.0673 | 313.5920 | <u>1</u> | <u>16</u> |
| 1550.34 | 158.0604 | 392.1187 | <u>2</u> | <u>30</u> |
| 1551.89 | 108.0415 | 288.0791 | <u>0</u> | <u>10</u> |
| 1553.06 | 107.0418 | 574.1512 | <u>0</u> | <u>5</u>  |
| 1556.88 | 143.0255 | 305.5711 | <u>0</u> | <u>5</u>  |
| 1559.05 | 45.0282  | 256.5724 | <u>0</u> | <u>1</u>  |
| 1559.06 | 110.0501 | 289.0834 | <u>1</u> | <u>8</u>  |
| 1559.28 | 44.0248  | 256.0707 | <u>1</u> | <u>16</u> |
| 1559.31 | 110.0480 | 344.1063 | <u>1</u> | <u>8</u>  |
| 1570.31 | 110.0461 | 577.1554 | <u>1</u> | <u>8</u>  |
| 1571.07 | 154.0175 | 388.0758 | <u>0</u> | <u>2</u>  |
| 1571.69 | 90.0560  | 324.1143 | <u>0</u> | <u>0</u>  |
| 1572.06 | 111.0483 | 578.1576 | <u>1</u> | <u>10</u> |
| 1572.70 | 110.0472 | 344.1055 | <u>1</u> | <u>8</u>  |
| 1573.23 | 170.0717 | 404.1300 | <u>0</u> | <u>19</u> |
| 1574.20 | 110.0457 | 289.0812 | <u>1</u> | <u>8</u>  |
| 1582.37 | 244.0836 | 478.1419 | <u>2</u> | <u>18</u> |
| 1588.20 | 154.0175 | 388.0759 | <u>0</u> | <u>2</u>  |
| 1590.84 | 414.2054 | 648.2637 | <u>0</u> | <u>6</u>  |
| 1591.51 | 138.0372 | 303.0769 | <u>0</u> | <u>1</u>  |
| 1592.89 | 220.1829 | 454.2412 | <u>0</u> | <u>3</u>  |
| 1593.16 | 112.0471 | 290.0819 | <u>0</u> | <u>0</u>  |
| 1593.22 | 110.0471 | 344.1054 | <u>1</u> | <u>8</u>  |
| 1593.72 | 110.0470 | 289.0818 | <u>1</u> | <u>8</u>  |
| 1597.07 | 111.0528 | 578.1621 | <u>0</u> | <u>0</u>  |
| 1606.82 | 188.0594 | 328.0880 | <u>0</u> | <u>4</u>  |
| 1611.64 | 220.1816 | 454.2400 | <u>0</u> | <u>3</u>  |
| 1619.07 | 270.0842 | 369.1004 | <u>0</u> | <u>33</u> |
| 1625.83 | 163.2363 | 397.2946 | <u>0</u> | <u>0</u>  |
| 1630.44 | 234.1969 | 468.2552 | <u>0</u> | <u>2</u>  |
| 1635.67 | 142.0180 | 305.0673 | <u>0</u> | <u>2</u>  |
| 1637.39 | 144.0128 | 306.0647 | <u>0</u> | <u>3</u>  |
| 1638.09 | 377.0559 | 611.1142 | <u>0</u> | <u>8</u>  |
| 1638.69 | 270.0865 | 369.1016 | <u>0</u> | <u>34</u> |
| 1639.20 | 379.0806 | 613.1390 | <u>0</u> | <u>3</u>  |
| 1640.08 | 403.0547 | 637.1130 | <u>0</u> | <u>4</u>  |
| 1640.89 | 144.0075 | 306.0621 | <u>0</u> | <u>7</u>  |
| 1641.67 | 144.0076 | 378.0659 | <u>0</u> | <u>7</u>  |
| 1642.09 | 146.0057 | 307.0612 | <u>0</u> | <u>1</u>  |
| 1642.12 | 203.0762 | 437.1345 | <u>0</u> | <u>36</u> |
| 1643.36 | 205.0818 | 439.1401 | <u>0</u> | <u>13</u> |

|         |          |          |                   |                    |
|---------|----------|----------|-------------------|--------------------|
| 1646.71 | 148.0877 | 382.1460 | <a href="#">1</a> | <a href="#">26</a> |
| 1648.67 | 211.0677 | 304.4142 | <a href="#">0</a> | <a href="#">22</a> |
| 1651.08 | 297.0594 | 531.1177 | <a href="#">0</a> | <a href="#">4</a>  |
| 1652.09 | 54.0192  | 288.0775 | <a href="#">0</a> | <a href="#">0</a>  |
| 1652.15 | 140.0485 | 304.0826 | <a href="#">0</a> | <a href="#">18</a> |
| 1653.62 | 160.0366 | 394.0949 | <a href="#">2</a> | <a href="#">39</a> |
| 1664.27 | 165.0551 | 399.1134 | <a href="#">0</a> | <a href="#">3</a>  |
| 1664.72 | 271.0926 | 369.6046 | <a href="#">0</a> | <a href="#">21</a> |
| 1665.45 | 166.0655 | 317.0911 | <a href="#">7</a> | <a href="#">49</a> |
| 1666.09 | 272.0944 | 370.1055 | <a href="#">0</a> | <a href="#">11</a> |
| 1669.09 | 222.1618 | 456.2201 | <a href="#">0</a> | <a href="#">3</a>  |
| 1671.60 | 137.0559 | 604.1653 | <a href="#">0</a> | <a href="#">9</a>  |
| 1673.41 | 301.2090 | 535.2673 | <a href="#">0</a> | <a href="#">3</a>  |
| 1676.09 | 43.0255  | 277.0838 | <a href="#">0</a> | <a href="#">1</a>  |

\*Click each matched number will link to a list of matches in [www.mycompoundid.org](http://www.mycompoundid.org).



Supplemental Table T4. List of 46 identified significant metabolites found in human serum samples that differentiate the PD group and the healthy control group.

| Retention time (min) | Mass of dansylated metabolite (Da) | Mass of metabolite (Da) | Metabolite                                      | HMDB ID   | ID       | Fold change | q-value  |
|----------------------|------------------------------------|-------------------------|-------------------------------------------------|-----------|----------|-------------|----------|
| 2.65                 | 432.1329                           | 198.0746                | 5-Acetylamino-6-amino-3-methyluracil            | HMDB04400 | Putative | 0.61        | 2.47E-03 |
| 3.20                 | 502.1385                           | 268.0802                | Inosine                                         | HMDB00195 | Putative | 0.74        | 6.86E-02 |
| 3.58                 | 471.1422                           | 237.0839                | Biopterin                                       | HMDB00468 | Putative | 1.36        | 1.74E-04 |
| 3.90                 | 409.1534                           | 175.0951                | Citrulline                                      | HMDB00904 | Library  | 0.83        | 2.23E-05 |
| 4.08                 | 399.1035                           | 165.0452                | Methionine Sulfoxide                            | HMDB02005 | Library  | 1.21        | 2.55E-02 |
| 4.60                 | 399.1037                           | 165.0454                | Methionine Sulfoxide - Isomer                   | HMDB02005 | Library  | 1.24        | 2.68E-02 |
| 4.90                 | 410.1372                           | 176.0789                | Ornithine [+CO <sub>2</sub> ]                   | HMDB00214 | Putative | 0.78        | 7.71E-06 |
| 6.81                 | 415.1316                           | 181.0733                | L-Threo-3-Phenylserine                          | HMDB02184 | Putative | 0.76        | 9.15E-05 |
| 7.40                 | 436.1894                           | 202.1311                | Isoleucyl-Alanine                               | HMDB28900 | Putative | 0.66        | 1.92E-08 |
| 7.63                 | 309.1269                           | 75.0685                 | 1-Amino-propan-2-ol                             | HMDB12136 | Putative | 1.90        | 5.32E-06 |
| 7.75                 | 465.1792                           | 231.1209                | Norphthalmic acid [-CO <sub>2</sub> ]           | HMDB05766 | Putative | 1.34        | 1.51E-02 |
| 8.21                 | 415.1314                           | 181.0731                | L-Threo-3-Phenylserine                          | HMDB02184 | Putative | 0.82        | 2.04E-02 |
| 8.56                 | 453.1683                           | 219.1100                | Pantothenic acid                                | HMDB00210 | Library  | 0.76        | 1.95E-02 |
| 9.34                 | 408.1574                           | 174.0991                | Glycyl-Valine                                   | HMDB28854 | Library  | 1.45        | 1.91E-02 |
| 9.52                 | 307.1116                           | 73.0533                 | Aminoacetone                                    | HMDB02134 | Putative | 1.48        | 1.02E-07 |
| 11.58                | 430.0946                           | 196.0363                | 4-Hydroxy-benzenepropanedioate                  | HMDB59809 | Putative | 179.70      | 6.28E-08 |
| 11.77                | 400.1053                           | 166.0470                | Methylxanthine                                  | HMDB10738 | Putative | 0.62        | 2.46E-03 |
| 12.02                | 400.1066                           | 166.0483                | 3-Methylxanthine                                | HMDB01866 | Putative | 0.65        | 4.44E-03 |
| 12.90                | 382.5800                           | 297.0434                | L-Cysteinylglycine disulfide                    | HMDB00709 | Putative | 0.83        | 9.87E-08 |
| 13.27                | 432.1101                           | 198.0518                | Vanillylmandelic acid                           | HMDB00291 | Library  | 3.80        | 2.07E-19 |
| 13.66                | 363.1361                           | 129.0778                | L-Pipecolic acid                                | HMDB00716 | Library  | 0.80        | 1.93E-02 |
| 14.61                | 434.1739                           | 200.1156                | Glycylproline [+C <sub>2</sub> H <sub>4</sub> ] | HMDB00721 | Putative | 0.82        | 1.18E-02 |
| 15.05                | 432.1101                           | 198.0518                | Isovanillylmandelic acid                        | NA        | Putative | 164.05      | 3.25E-07 |

|       |          |          |                                     |           |          |        |          |
|-------|----------|----------|-------------------------------------|-----------|----------|--------|----------|
| 15.87 | 414.1232 | 180.0649 | Theophylline                        | HMDB01889 | Library  | 0.48   | 4.42E-07 |
| 17.58 | 355.6188 | 243.1210 | Aspartyllysine [-H2O]               | HMDB04985 | Putative | 1.24   | 2.07E-04 |
| 17.77 | 372.0888 | 138.0305 | 4-Hydroxybenzoic acid               | HMDB00500 | Putative | 0.80   | 7.15E-03 |
| 17.88 | 402.1001 | 168.0418 | Vanillic acid                       | HMDB00484 | Library  | 3.48   | 3.96E-20 |
| 20.43 | 414.1364 | 180.0781 | p-Hydroxyphenylacetic acid [+C2H4]  | HMDB00020 | Putative | 3.75   | 5.91E-02 |
| 20.81 | 333.1627 | 99.1044  | Cyclohexylamine                     | HMDB31404 | Putative | 0.60   | 1.71E-02 |
| 20.82 | 539.3191 | 305.2608 | Capsaicin                           | HMDB02227 | Putative | 1.65   | 7.89E-06 |
| 21.00 | 314.1180 | 160.1193 | N(6)-Methyllysine                   | HMDB02038 | Putative | 0.65   | 2.91E-03 |
| 21.01 | 315.1180 | 162.1193 | Tryptamine [+2H]                    | HMDB00303 | Putative | 0.68   | 6.05E-03 |
| 21.75 | 386.1039 | 152.0456 | Vanillin                            | HMDB12308 | Putative | 1.27   | 1.01E-02 |
| 22.21 | 338.1026 | 208.0885 | 5-Hydroxyindoleacetic acid [+NH3]   | HMDB00763 | Putative | 0.61   | 2.55E-19 |
| 22.28 | 679.1967 | 212.0873 | Histidinyl-Glycine                  | HMDB28885 | Putative | 29.32  | 4.66E-06 |
| 23.42 | 346.0986 | 224.0805 | Hydroxykynurenine                   | HMDB00732 | Library  | 2.73   | 1.30E-08 |
| 23.75 | 328.0712 | 188.0259 | L-Homocysteine sulfonic acid [+NH3] | HMDB02238 | Putative | 0.82   | 1.23E-02 |
| 24.23 | 310.0751 | 152.0336 | 6,8-Dihydroxypurine                 | HMDB01182 | Putative | 0.59   | 6.15E-02 |
| 24.38 | 302.0852 | 136.0538 | Dopamine [-NH3]                     | HMDB00073 | Putative | 0.75   | 1.76E-03 |
| 24.38 | 342.1314 | 216.1461 | Valyl-Valine                        | NA        | Putative | 0.82   | 9.95E-02 |
| 24.69 | 302.0841 | 136.0515 | Dopamine [-NH3]                     | HMDB00074 | Putative | 0.83   | 1.70E-02 |
| 25.06 | 322.1050 | 176.0933 | Serotonin                           | HMDB00259 | Library  | 0.79   | 1.07E-02 |
| 27.48 | 304.4142 | 211.0677 | a-Methyldopa                        | HMDB11754 | Putative | 231.42 | 3.64E-02 |
| 27.54 | 304.0826 | 140.0485 | Vanillic acid [-CO]                 | HMDB00484 | Putative | 11.77  | 3.81E-03 |
| 27.74 | 399.1134 | 165.0551 | Methylguanine                       | HMDB03282 | Putative | 240.60 | 6.28E-08 |
| 27.76 | 317.0911 | 166.0655 | 3,4-Dihydroxyphenylacetone          | HMDB31132 | Putative | 208.33 | 1.38E-22 |

Supplemental Table T5. List of 18 identified significant metabolites found in human serum samples that differentiate the PDND subgroup and the PDID subgroup.

| Retention time (min) | Mass of dansylated metabolite (Da) | Mass of metabolite (Da) | Metabolite                                        | HMDB ID   | ID       | Fold change | q value  |
|----------------------|------------------------------------|-------------------------|---------------------------------------------------|-----------|----------|-------------|----------|
| 3.20                 | 502.1385                           | 268.0802                | Riboside of Purine [+O]                           | NA        | Putative | 0.51        | 8.63E-02 |
| 10.38                | 381.1466                           | 147.0883                | Hydroxyisoleucine                                 | NA        | Putative | 1.47        | 8.20E-02 |
| 11.58                | 430.0946                           | 196.0363                | 4-Hydroxy-benzenepropanedioate                    | HMDB59809 | Putative | 1.33        | 9.22E-02 |
| 12.87                | 363.1360                           | 129.0777                | L-Proline [+CH <sub>2</sub> ]                     | HMDB00612 | Putative | 0.81        | 8.17E-02 |
| 13.74                | 351.1000                           | 117.0417                | L-2-Amino-3-oxobutanoic acid                      | HMDB06454 | Putative | 1.35        | 3.32E-02 |
| 14.18                | 315.1080                           | 162.0995                | 5-Hydroxylysine                                   | HMDB00450 | Library  | 1.23        | 7.94E-02 |
| 16.71                | 727.2133                           | 493.1550                | His-Asn-Asp-Ser                                   | NA        | Putative | 1.72        | 1.64E-02 |
| 18.39                | 427.1304                           | 193.0721                | Phenylacetyl glycine                              | HMDB00821 | Putative | 1.27        | 4.33E-02 |
| 18.41                | 400.1196                           | 166.0612                | Desaminotyrosine                                  | HMDB02199 | Library  | 0.64        | 8.91E-02 |
| 19.09                | 370.0962                           | 136.0379                | Purine [+O]                                       | HMDB01366 | Putative | 0.44        | 8.17E-02 |
| 20.83                | 314.1014                           | 160.0862                | Alanyl-alanine                                    | NA        | Putative | 1.44        | 3.28E-02 |
| 21.43                | 321.1081                           | 174.0995                | Ornithine [+C <sub>2</sub> H <sub>2</sub> O]      | HMDB00214 | Putative | 1.37        | 7.55E-02 |
| 21.43                | 322.1082                           | 176.0997                | Tryptamine [+O]                                   | HMDB00303 | Putative | 1.33        | 8.20E-02 |
| 22.42                | 303.1154                           | 69.0571                 | 1-Pyrroline-2-carboxylic acid [-CO <sub>2</sub> ] | HMDB06875 | Putative | 1.32        | 2.38E-02 |
| 22.43                | 277.1000                           | 86.0834                 | Putrescine [-2H]                                  | HMDB01414 | Putative | 1.41        | 1.64E-02 |
| 24.03                | 284.1077                           | 100.0988                | Cadaverine [-2H]                                  | HMDB02322 | Putative | 1.20        | 8.17E-02 |
| 24.92                | 338.5921                           | 209.0675                | Hydroxyphenylacetyl glycine                       | HMDB00735 | Putative | 1.23        | 8.17E-02 |
| 27.76                | 317.0911                           | 166.0655                | 3,4-Dihydroxyphenylacetone                        | HMDB31132 | Putative | 1.54        | 6.65E-02 |

Supplemental Table T6. List of 38 unidentified metabolites with their fold changes (FC) and p-values for both Control vs. PD and PDND vs. PDID. The identified metabolites are listed at the end of the table for comparison.

| ID  | Retention time (second) | m/z      | FC (Control vs. PD) | p-value (Control vs. PD) | FC (PDND vs. PDID) | p-value (PDND vs. PDID) |
|-----|-------------------------|----------|---------------------|--------------------------|--------------------|-------------------------|
| 122 | 416.3                   | 240.0087 | 1.03                | 1.93E-01                 | 0.97               | 2.88E-01                |
| 137 | 444.8                   | 517.0723 | 0.94                | 1.08E-01                 | 0.96               | 4.90E-01                |
| 228 | 633.7                   | 51.1007  | 1.04                | 2.81E-01                 | 0.95               | 3.18E-01                |
| 243 | 684.5                   | 176.1110 | 0.88                | 5.03E-05                 | 0.90               | 3.66E-02                |
| 248 | 691.2                   | 177.0338 | 0.76                | 2.22E-06                 | 0.90               | 1.91E-01                |
| 250 | 699.0                   | 89.0781  | 1.03                | 5.86E-01                 | 1.05               | 5.36E-01                |
| 253 | 701.9                   | 117.0734 | 1.10                | 1.51E-01                 | 1.28               | 2.11E-02                |
| 281 | 754.1                   | 356.2273 | 1.03                | 6.21E-01                 | 0.92               | 2.13E-01                |
| 283 | 758.6                   | 325.1865 | 1.05                | 2.94E-01                 | 0.95               | 4.41E-01                |
| 288 | 768.5                   | 273.1796 | 0.89                | 7.54E-02                 | 0.96               | 6.93E-01                |
| 341 | 866.5                   | 349.1993 | 1.00                | 9.81E-01                 | 1.06               | 3.63E-01                |
| 356 | 905.9                   | 112.0967 | 1.03                | 1.28E-01                 | 0.96               | 2.11E-01                |
| 376 | 963.0                   | 135.0434 | 0.91                | 2.34E-03                 | 1.04               | 4.19E-01                |
| 423 | 1066.6                  | 181.0667 | 0.90                | 2.61E-03                 | 0.96               | 4.29E-01                |
| 436 | 1102.2                  | 96.2056  | 0.68                | 2.96E-06                 | 0.99               | 9.33E-01                |
| 438 | 1103.2                  | 157.0685 | 0.96                | 9.66E-02                 | 0.96               | 2.43E-01                |
| 441 | 1105.7                  | 157.0684 | 0.97                | 2.74E-01                 | 0.98               | 6.57E-01                |
| 447 | 1107.3                  | 27.0111  | 0.95                | 3.37E-02                 | 0.98               | 5.32E-01                |
| 450 | 1114.6                  | 93.0323  | 1.10                | 5.08E-02                 | 0.99               | 8.31E-01                |
| 464 | 1140.1                  | 438.0025 | 0.97                | 4.73E-01                 | 0.86               | 1.64E-03                |
| 465 | 1142.6                  | 240.0089 | 1.10                | 1.21E-02                 | 0.93               | 2.26E-01                |
| 506 | 1249.1                  | 305.2608 | 1.65                | 5.75E-07                 | 1.10               | 4.75E-01                |
| 514 | 1259.2                  | 161.1239 | 0.73                | 1.05E-02                 | 0.81               | 2.90E-01                |
| 527 | 1274.8                  | 868.0080 | 1.08                | 1.52E-01                 | 0.94               | 4.51E-01                |
| 546 | 1308.5                  | 118.0931 | 0.88                | 4.95E-04                 | 0.99               | 9.00E-01                |
| 564 | 1332.8                  | 117.0977 | 0.90                | 6.00E-05                 | 0.96               | 2.80E-01                |

|                                      |        |          |      |          |      |          |
|--------------------------------------|--------|----------|------|----------|------|----------|
| 567                                  | 1335.4 | 118.0932 | 0.92 | 6.01E-04 | 0.92 | 3.81E-02 |
| 604                                  | 1401.3 | 163.0567 | 0.93 | 2.14E-02 | 0.92 | 1.02E-01 |
| 615                                  | 1412.0 | 163.0563 | 0.92 | 1.91E-02 | 0.88 | 2.91E-02 |
| 621                                  | 1438.0 | 101.1039 | 0.92 | 1.55E-01 | 1.10 | 2.45E-01 |
| 625                                  | 1442.4 | 102.0989 | 0.90 | 2.49E-02 | 1.17 | 3.68E-02 |
| 631                                  | 1446.0 | 56.0503  | 0.99 | 6.06E-01 | 1.02 | 6.56E-01 |
| 652                                  | 1505.9 | 56.0946  | 1.03 | 3.31E-01 | 0.99 | 7.36E-01 |
| 676                                  | 1571.7 | 90.0560  | 1.03 | 1.40E-01 | 1.02 | 6.06E-01 |
| 686                                  | 1593.2 | 112.0471 | 1.03 | 3.76E-01 | 0.92 | 4.78E-02 |
| 689                                  | 1597.1 | 111.0528 | 1.02 | 5.12E-01 | 1.00 | 9.74E-01 |
| 693                                  | 1625.8 | 163.2363 | 1.48 | 3.02E-03 | 0.99 | 9.76E-01 |
| 709                                  | 1652.1 | 54.0192  | 1.09 | 8.35E-02 | 0.87 | 5.97E-02 |
| 5-Acetylamino-6-amino-3-methyluracil | 159.1  | 198.0746 | 0.61 | 5.95E-04 |      |          |
| Hydroxykynurenine                    | 1405.4 | 224.0805 | 2.73 | 2.48E-10 |      |          |
| Theophylline                         | 952.0  | 180.0649 | 0.48 | 2.38E-08 |      |          |
| Vanillic acid                        | 1072.6 | 168.0418 | 3.48 | 2.51E-22 |      |          |
| Isoleucyl-Alanine                    | 444.2  | 202.1311 | 0.66 | 4.26E-10 |      |          |
| 3,4-Dihydroxy-phenylacetone          | 1665.5 | 166.0655 |      |          | 1.54 | 3.52E-03 |
| alanyl-alanine                       | 1250.0 | 160.0862 |      |          | 1.44 | 7.10E-04 |
| Cyclohexylamine                      | 1248.4 | 99.1044  |      |          | 1.46 | 4.47E-02 |
| Desaminotyrosine                     | 1104.6 | 166.0612 |      |          | 0.64 | 1.16E-02 |
| His Asn Asp Ser                      | 1002.8 | 493.1550 |      |          | 1.72 | 2.44E-04 |
| Hydroxyisoleucine                    | 622.6  | 147.0883 |      |          | 1.47 | 6.49E-03 |
| Purine [+O]                          | 1145.3 | 136.0379 |      |          | 0.44 | 8.26E-03 |
| Riboside of Purine [+O]              | 192.2  | 268.0802 |      |          | 0.51 | 8.45E-03 |

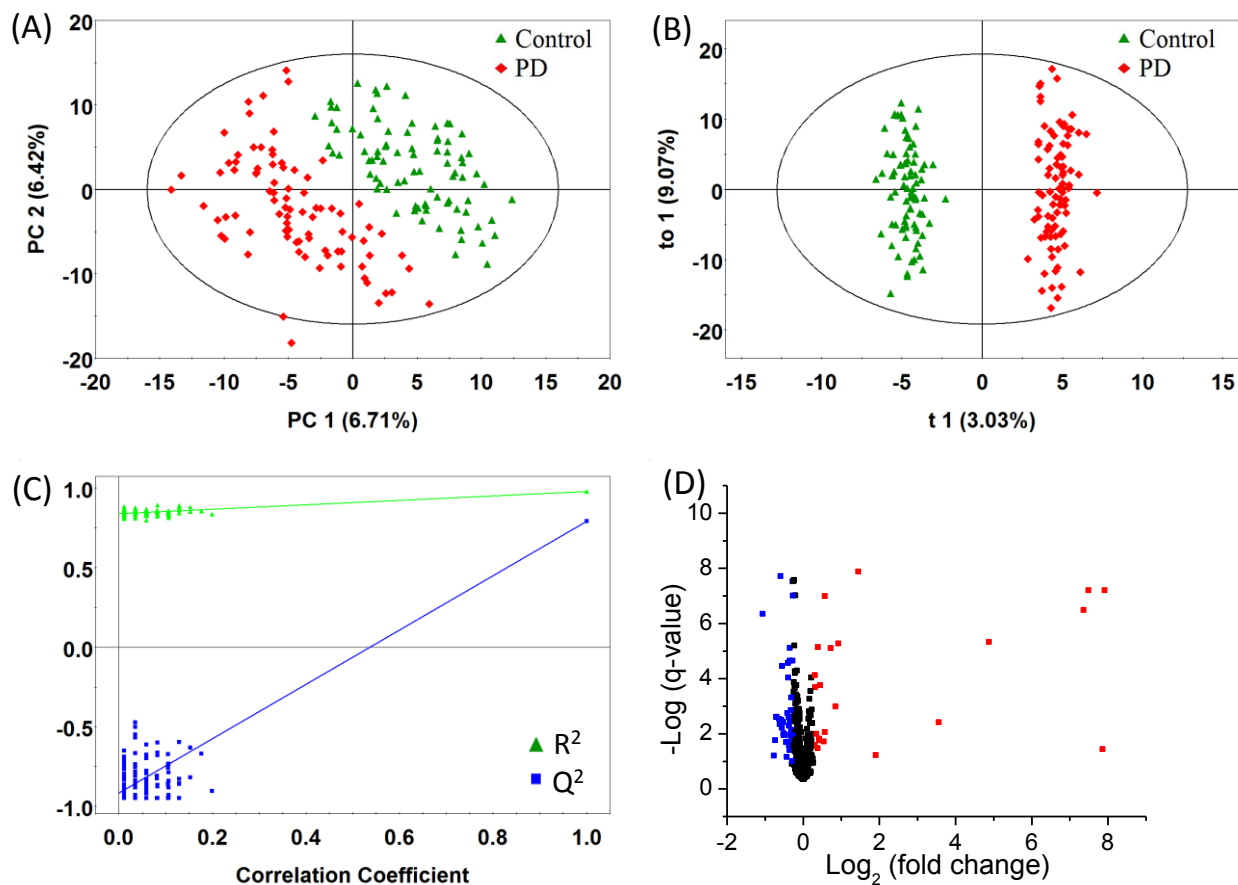

Supplemental Figure S1. (A) PLS-DA and (B) OPLS-DA score plots of dansylation LC-MS data obtained from 42 healthy controls (in green) and 43 PD patients (in red). (“PC” represents for “principal component” and the corresponding percentage is the percentage of the variance among all the data points that this principal component covers.) R<sup>2</sup> and Q<sup>2</sup> values given by cross-validation are: 0.977 and 0.791 for PLS-DA; 0.974 and 0.866 for OPLS-DA. (C) Response permutation test result of the PLS-DA model in Figure S1A. (D) Volcano plot of the comparison between healthy control and PD showing 28 variables with FC > 1.2, q < 0.1 (in red) and 48 variables with FC < 0.83, q < 0.1 (in blue).

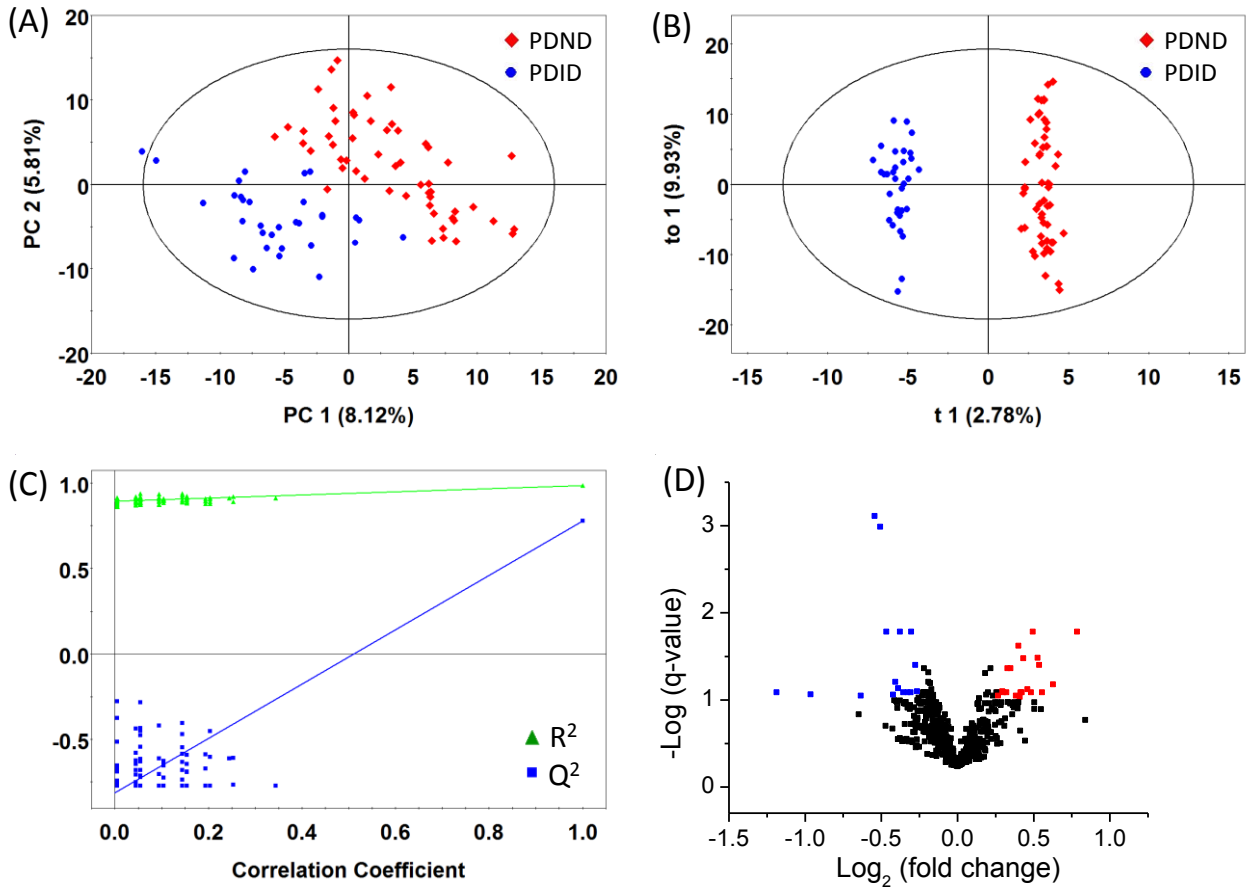

Supplemental Figure S2. (A) PLS-DA and (B) OPLS-DA score plots of dansylation LC-MS data obtained from 27 PD patients without dementia (PDND in red) and 16 PD patients with incipient dementia (PDID in blue). R<sup>2</sup> and Q<sup>2</sup> values given by cross-validation are: 0.974 and 0.866 for PLS-DA; 0.982 and 0.813 for OPLS-DA. (C) Response permutation test result of the PLS-DA model in Figure S2A. (D) Volcano plot of the comparison between the PDND subgroup and the PDID subgroup showing 21 variables with FC > 1.2, q < 0.1 (in red) and 15 variables with FC < 0.83, q < 0.1 (in blue).

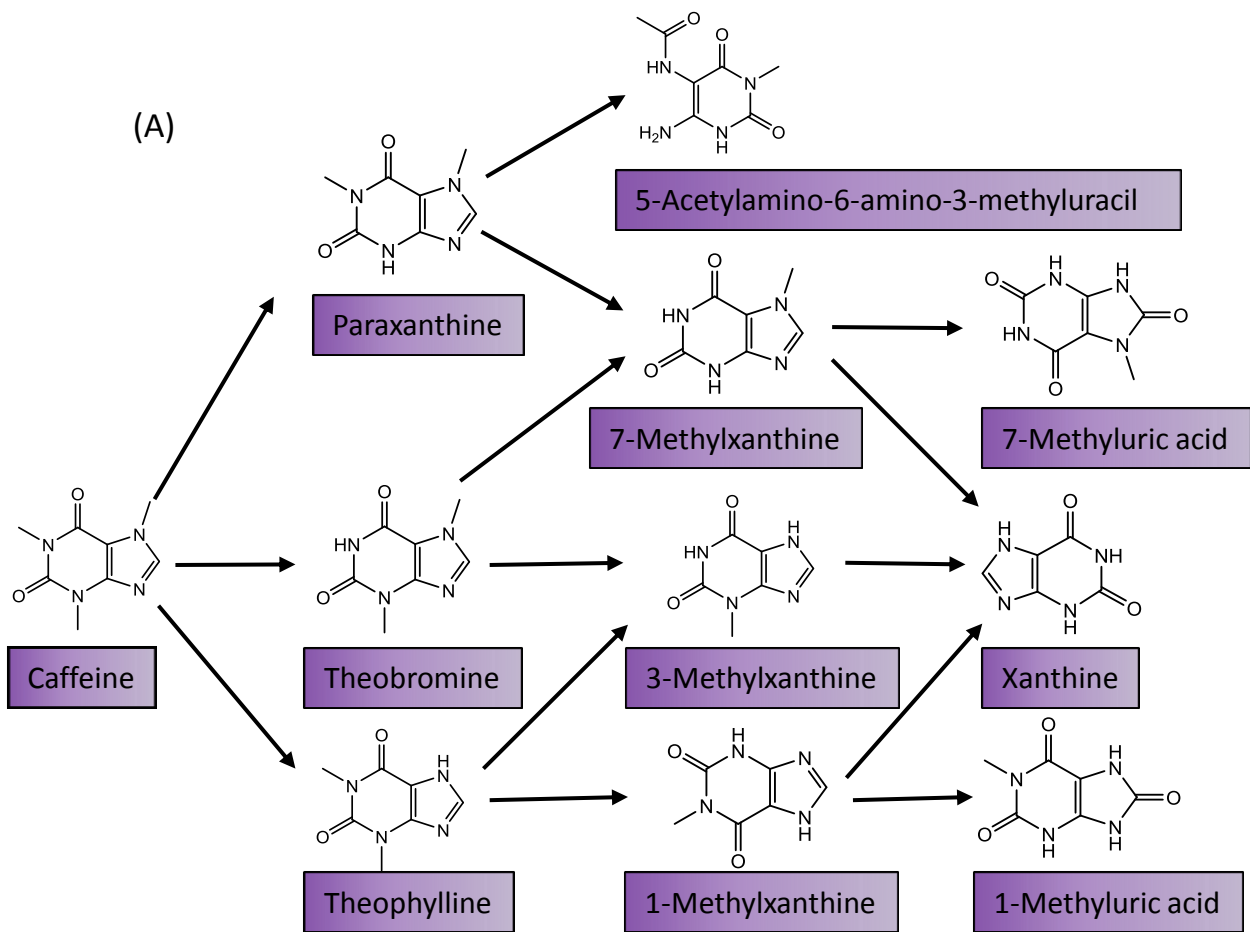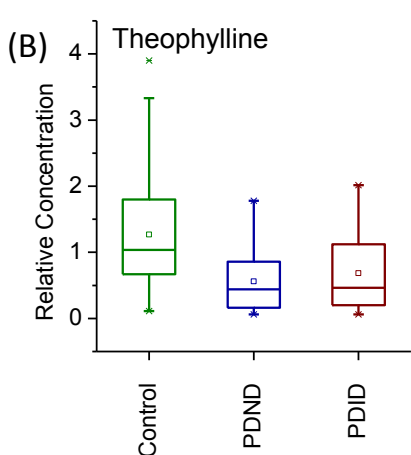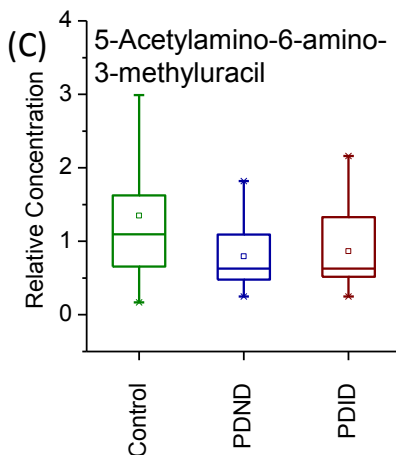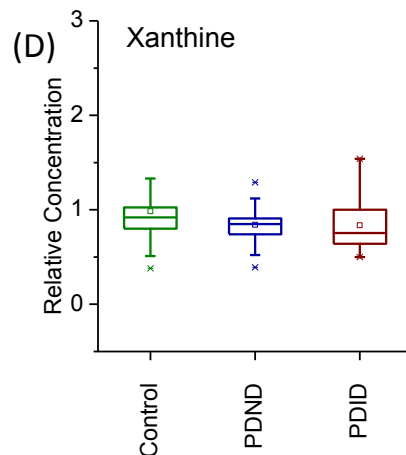

Supplemental Figure S3. (A) A simplified schematic of the caffeine metabolism pathway. Box plots of the relative concentrations of theophylline (B), 5-acetylamino-6-amino-3-methyluracil (C) and xanthine (D) in the control group, the PDND subgroup and the PDID subgroup.



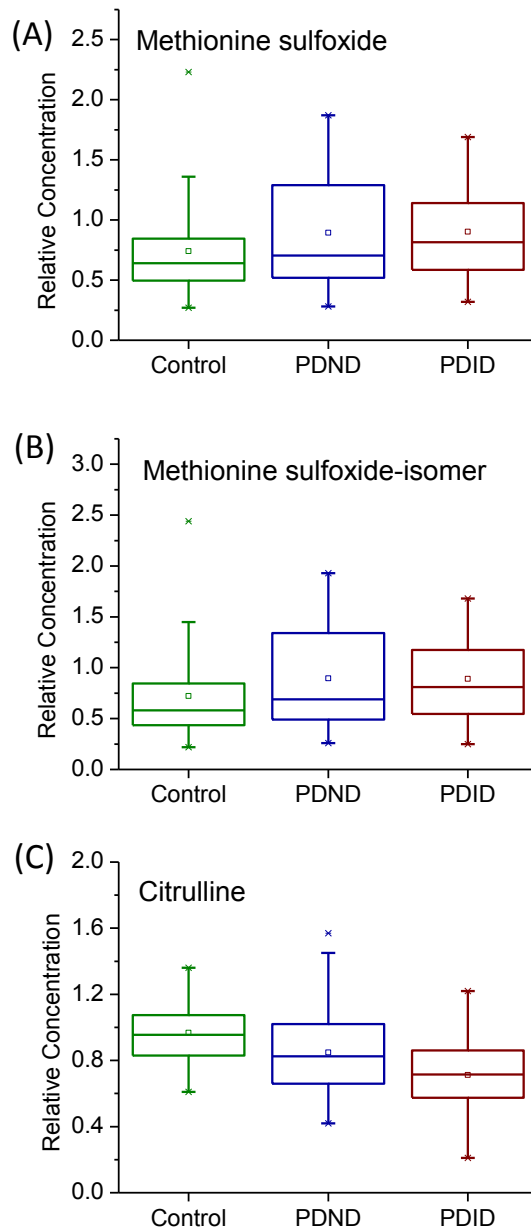

Supplemental Figure S4. Box plots of the relative concentrations of methionine sulfoxide (A), methionine sulfoxide-isomer (B) and citrulline (C) in the control group, the PDND subgroup and the PDID subgroup.
